# Supplementary material for: Exploration, synthesis and studies of gel forming simple sugar-chalcone derivatives
Source: Royal Society of Chemistry journal article supplement (doi:10.1039/c4ra06544a), 2014-01-01
Supplement: c4ra06544a1.pdf [file c4ra06544a1.pdf]

# Exploration, Synthesis and studies of gel forming simple sugar chalcone derivatives

Arasappan Hemamalini<sup>a</sup>, Thangamuthu Mohan Das<sup>a,b\*</sup>

<sup>a</sup>Department of Organic Chemistry, University of Madras, Guindy Campus, Chennai – 600 025, INDIA.

<sup>b</sup>Department of Chemistry, School of Basic and Applied Sciences, Central University of Tamil Nadu, Thiruvavur -610 004; Ph. No. +919489054264; Fax 04366 – 225312; E-mail: [tmohandas@cutn.ac.in](mailto:tmohandas@cutn.ac.in)

## 1. Experimental Section

### 1.1 Materials and methods

D-Glucose was purchased from Sigma-Aldrich Chemicals Pvt. Ltd., USA and was of high purity. Butyraldehyde and the organic catalyst (pyrrolidine) were obtained from SRL, India. Other reagents, such as, hydrochloric acid, sodium hydrogen carbonate, and solvents (AR Grade) were obtained from Sd-fine, India, in high purity and were used without any further purification. Acetyl acetone was purchased from loba-chemie. Acetic anhydride was purchased from Fischer Chemicals Pvt. Ltd., India. The solvents were purified according to the standard methods. Column chromatography was performed on silica gel (100 – 200 mesh). NMR spectra were recorded on a Bruker DRX 300 MHz instrument in either CDCl<sub>3</sub> or DMSO-d<sub>6</sub>. Chemical shifts are referenced to internal TMS. Elemental analysis were performed using a Perkin-Elmer 2400 series CHNS/O analyzer. While assigning the spectral data, several abbreviations were used and these include ‘Ar’ for aromatic, ‘Sac’ for saccharide ‘Alk’ for alkene respectively.

#### 2.1 General procedure for the synthesis of sugar chalcone derivatives (5-22):

To a solution of  $\beta$ -C-glycosidic ketone, (**1** / **2** / **3**) (1 mmol) in dry DCM (5 ml) were added pyrrolidine (30% mol) and aldehyde (1.2 mmol). After stirring at room temperature for a given period of time, the reaction mixture was evaporated under reduced pressure and extracted using EtOAc-water mixture. The ethylacetate layer was dried over anhyd. Na<sub>2</sub>SO<sub>4</sub> and concentrated to dryness. The product thus obtained was further purified by column chromatography.

#### 2.1a Synthesis, physicochemical and spectral data of (*E*)-1-(4,6-*O*-butylidene- $\beta$ -D-glucopyranosyl)-4-(4-bromophenyl)-but-3-en-2-one (**5**):

Compound, **5** was obtained by the aldol condensation of 4,6-*O*-butylidene- $\beta$ -D-

glucopyranosyl-propane-2-one, **1** (0.27 g, 1 mmol) with 4-bromobenzaldehyde (0.22 g, 1.2 mmol) as a colourless fluffy solid.

Mp: 228-230 °C; Yield: 0.30 g (68%); <sup>1</sup>H NMR (300 MHz, CDCl<sub>3</sub> + DMSO-d<sub>6</sub>): δ 7.65-7.45 (m, 5H, Alk-H, Ar-H), 6.77 (d, *J* = 16.2 Hz, 1H, Alk-H), 5.09 (s, 1H, Sac-OH), 4.87 (s, 1H, Sac-OH), 4.53 (t, *J* = 5.0 Hz, 1H, Sac-H), 4.05 (dd, *J* = 3.0 Hz, *J* = 10.1 Hz, 1H, Sac-H), 3.86 (t, *J* = 8.9 Hz, 1H, Sac-H), 3.60 (t, *J* = 9.0 Hz, 1H, Sac-H), 3.39 (t, *J* = 9.8 Hz, 1H, Sac-H), 3.31-3.27 (m, 1H, Sac-H), 3.40-3.10 (m, 2H, Sac-H), 3.12-3.09 (m, 1H, -CH<sub>2</sub>), 2.82 (dd, *J* = 9.0 Hz, *J* = 15.9 Hz, 1H, -CH<sub>2</sub>), 1.65-1.57 (m, 2H, -CH<sub>2</sub>), 1.42 (q, *J* = 7.2 Hz, 2H, -CH<sub>2</sub>), 0.90 (t, *J* = 7.2 Hz, 3H, -CH<sub>3</sub>); <sup>13</sup>C NMR (75 MHz, CDCl<sub>3</sub> + DMSO-d<sub>6</sub>): δ 202.7, 146.2, 138.3, 136.9, 134.6, 131.9, 129.2, 106.9, 85.5, 81.6, 79.5, 79.3, 75.4, 73.0, 48.3, 41.0, 22.1, 18.8; Elemental analysis Anal. Calc. for C<sub>20</sub>H<sub>25</sub>BrO<sub>6</sub>: C, 54.43; H, 5.71%. Found: C, 54.47; H, 5.75.

### **2.1b Synthesis, physicochemical and spectral data of (*E*)-1-(4,6-*O*-butylidene-β-D-glucopyranosyl)-4-(4-fluorophenyl)-but-3-en-2-one (**6**):**

Compound, **6** was obtained by the aldol condensation of 4,6-*O*-butylidene-β-D-glucopyranosyl-propane-2-one, **1** (0.27 g, 1 mmol) with 4-fluorobenzaldehyde, (0.15 g, 1.2 mmol) as a colourless fluffy solid.

Mp: 220-226 °C; Yield: 0.18 g (53%); <sup>1</sup>H NMR (300 MHz, CDCl<sub>3</sub> + DMSO-d<sub>6</sub>): δ 7.56-7.47 (m, 5H, Alk-H, Ar-H), 6.79 (d, *J* = 16.2 Hz, 1H, Alk-H), 4.52 (t, *J* = 5.0 Hz, 1H, Sac-H), 4.03 (dd, *J* = 3.9 Hz, *J* = 9.9 Hz, 1H, Sac-H), 3.84 (t, *J* = 9.3 Hz, 1H, Sac-H), 3.54 (t, *J* = 8.6 Hz, 1H, Sac-H), 3.37 (t, *J* = 8.4 Hz, 2H, Sac-H), 3.26-3.19 (m, 2H, Sac-H), 3.12 (dd, *J* = 2.4 Hz, *J* = 15.9 Hz, 1H, -CH<sub>2</sub>), 2.81 (dd, *J* = 9.0 Hz, *J* = 15.9 Hz, 1H, -CH<sub>2</sub>), 1.64-1.56 (m, 2H, -CH<sub>2</sub>), 1.41 (q, *J* = 7.8 Hz, 2H, -CH<sub>2</sub>), 0.90 (t, *J* = 7.4 Hz, 3H, -CH<sub>3</sub>); <sup>13</sup>C NMR (75 MHz, CDCl<sub>3</sub> + DMSO-d<sub>6</sub>): δ 202.4, 146.0, 138.4, 136.9, 134.7, 132.0, 129.1, 106.9, 85.6, 81.6, 79.6, 79.4, 75.4, 73.0, 48.4, 41.1, 22.1, 18.8; Elemental analysis Anal. Calc. for C<sub>20</sub>H<sub>25</sub>FO<sub>6</sub>: C, 63.15; H, 6.62%. Found: C, 63.19; H, 6.67.

### **2.1c Synthesis, physicochemical and spectral data of (*E*)-1-(4,6-*O*-butylidene-β-D-glucopyranosyl)-4-(4-allyloxyphenyl)-but-3-en-2-one (**7**):**

Compound, **7** was obtained by the aldol condensation of 4,6-*O*-butylidene-β-D-glucopyranosyl-propane-2-one, **1** (0.27 g, 1 mmol) with 4-allyloxybenzaldehyde,

(0.19 g, 1.2 mmol) as a colourless fluffy solid.

Mp: 204-208 °C; Yield: 0.19 g (45%); <sup>1</sup>H NMR (300 MHz, CDCl<sub>3</sub> + DMSO-d<sub>6</sub>): δ 7.86-7.80 (m, 3H, Alk-H, Ar-H), 7.24 (d, *J* = 8.7 Hz, 1H, Ar-H), 6.96 (d, *J* = 15.9 Hz, 1H, Alk-H), 6.40-6.30 (m, 1H, Alk-H), 5.73 (d, *J* = 17.1 Hz, 1H, Alk-H), 5.62 (d, *J* = 10.5 Hz, 1H, Alk-H), 5.28 (d, *J* = 4.5 Hz, 1H, -OCH<sub>2</sub>), 5.05 (d, *J* = 3.0 Hz, 1H, Sac-OH), 4.89 (d, *J* = 5.1 Hz, 1H, -Sac-OH), 4.84 (t, *J* = 5.0 Hz, 1H, Ace-H), 4.38 (dd, *J* = 3.9 Hz, *J* = 9.9 Hz, 1H, Sac-H), 4.19 (t, *J* = 4.5 Hz, 1H, Sac-H), 3.93 (t, *J* = 4.2 Hz, 1H, Sac-H), 3.71 (t, *J* = 9.6 Hz, 1H, Sac-H), 3.63-3.45 (m, 4H, Sac-H, -CH<sub>2</sub>), 3.12 (dd, *J* = 9.0 Hz, *J* = 15.9 Hz, 1H, -CH<sub>2</sub>), 1.95-1.89 (m, 2H, -CH<sub>2</sub>), 1.73 (q, *J* = 7.5 Hz, 2H, -CH<sub>2</sub>), 1.21 (t, *J* = 7.4 Hz, 3H, -CH<sub>3</sub>); <sup>13</sup>C NMR (75 MHz, CDCl<sub>3</sub> + DMSO-d<sub>6</sub>): δ 202.7, 165.3, 147.6, 137.5, 134.8, 131.9, 129.1, 122.7, 119.9, 107.0, 85.4, 81.5, 79.7, 79.4, 75.3, 73.5, 73.1, 48.0, 41.0, 22.1, 18.7; ESI-MS Calc. for C<sub>23</sub>H<sub>30</sub>O<sub>7</sub>, 418.20; *m/z* found, 419.20 [M+H]<sup>+</sup>; Elemental analysis Anal. Calc. for C<sub>23</sub>H<sub>30</sub>O<sub>7</sub>: C, 66.01; H, 7.23%. Found: C, 66.06; H, 7.27.

#### **2.1d Synthesis, physicochemical and spectral data of (*E*)-1-(4,6-*O*-butylidene-β-D-glucopyranosyl)-4-(4-hydroxyphenyl)-but-3-en-2-one (8):**

Compound, **8** was obtained by the aldol condensation of 4,6-*O*-butylidene-β-D-glucopyranosyl-propane-2-one, **1** (0.27 g, 1 mmol) with 4-hydroxybenzaldehyde, (0.14 g, 1.2 mmol) as a colourless solid.

Mp: 188-190 °C; Yield: 0.22 g (58%); <sup>1</sup>H NMR (300 MHz, CDCl<sub>3</sub> + DMSO-d<sub>6</sub>): δ 9.50 (s, 1H, Ph-OH), 7.53-7.40 (m, 3H, Ar-H), 6.86 (d, *J* = 8.4 Hz, 2H, Ar-H), 6.60 (d, *J* = 15.9 Hz, 1H, Alk-H), 4.76 (s, 1H, Sac-OH), 4.53 (t, *J* = 5.0 Hz, 1H, Sac-H), 4.10-4.07 (m, 1H, Sac-H), 3.89 (t, *J* = 7.8 Hz, 1H, Sac-H), 3.64 (t, *J* = 7.8 Hz, 1H, Sac-H), 3.40 (t, *J* = 9.6 Hz, 1H, Sac-H), 3.32-3.21 (m, 3H, Sac-H), 3.15-3.09 (m, 1H, -CH<sub>2</sub>), 2.80-2.77 (m, 1H, -CH<sub>2</sub>), 1.64-1.61 (m, 2H, -CH<sub>2</sub>), 1.40 (q, *J* = 7.2 Hz, 2H, -CH<sub>2</sub>), 0.90 (t, *J* = 7.2 Hz, 3H, -CH<sub>3</sub>); <sup>13</sup>C NMR (75 MHz, CDCl<sub>3</sub> + DMSO-d<sub>6</sub>): δ 192.6, 154.8, 138.1, 124.9, 120.4, 118.1, 110.9, 96.9, 75.3, 71.0, 69.8, 69.5, 65.3, 63.1, 37.9, 31.0, 12.1, 8.6; Elemental analysis Anal. Calc. for C<sub>20</sub>H<sub>26</sub>O<sub>7</sub>: C, 63.48; H, 6.93%. Found: C, 63.53; H, 6.97.

**2.1e Synthesis, physicochemical and spectral data of (*E*)-1-(4,6-*O*-butylidene- $\beta$ -D-glucopyranosyl)-4-(3-hydroxyphenyl)-but-3-en-2-one (9):**

Compound, **9** was obtained by the aldol condensation of 4,6-*O*-butylidene- $\beta$ -D-glucopyranosyl-propane-2-one, **1** (0.27 g, 1 mmol) with 3-hydroxybenzaldehyde, (0.14 g, 1.2 mmol) as a colourless solid.

Mp: 162-164 °C; Yield: 0.20 g (53%); <sup>1</sup>H NMR (300 MHz, CDCl<sub>3</sub> + DMSO-d<sub>6</sub>):  $\delta$  9.60 (s, 1H, Ph-OH), 7.62 (t, *J* = 7.7 Hz, 1H, Ar-H), 7.93 (s, 1H, Ar-H), 7.45-7.42 (m, 2H, Alk-H, Ar-H), 7.31 (d, *J* = 7.8 Hz, 1H, Ar-H), 7.13 (d, *J* = 16.2 Hz, 1H, Alk-H), 5.30 (s, 1H, Sac-OH), 5.02 (s, 1H, Sac-OH), 4.95 (t, *J* = 5.0 Hz, 1H, Sac-H), 4.50 (dd, *J* = 3.3 Hz, *J* = 10.1 Hz, 1H, Sac-H), 4.30 (t, *J* = 8.5 Hz, 1H, Sac-H), 4.05 (t, *J* = 8.1 Hz, 1H, Sac-H), 3.82 (t, *J* = 9.6 Hz, 1H, Sac-H), 3.74-3.62 (m, 3H, Sac-H), 3.55 (dd, *J* = 2.4 Hz, *J* = 15.9 Hz, 1H, -CH<sub>2</sub>), 3.24 (dd, *J* = 9.0 Hz, *J* = 15.9 Hz, 1H, -CH<sub>2</sub>), 2.08-2.02 (m, 2H, -CH<sub>2</sub>), 1.83 (q, *J* = 7.2 Hz, 2H, -CH<sub>2</sub>), 1.40 (t, *J* = 7.2 Hz, 3H, -CH<sub>3</sub>); <sup>13</sup>C NMR (75 MHz, CDCl<sub>3</sub> + DMSO-d<sub>6</sub>):  $\delta$  192.7, 152.4, 138.0, 130.3, 124.5, 121.0, 114.4, 112.7, 109.4, 96.9, 75.2, 71.3, 69.7, 69.4, 65.2, 63.0, 37.9, 30.9, 12.0, 8.6; Elemental analysis Anal. Calc. for C<sub>20</sub>H<sub>26</sub>O<sub>7</sub>: C, 63.48; H, 6.93%. Found: C, 63.53; H, 6.97.

**2.1f Synthesis, physicochemical and spectral data of (*E*)-1-(4,6-*O*-butylidene- $\beta$ -D-glucopyranosyl)-4-(5-chloro-2-hydroxyphenyl)-but-3-en-2-one (10):**

Compound, **10** was obtained by the reaction of aldol condensation of 4,6-*O*-butylidene- $\beta$ -D-glucopyranosyl-propane-2-one, **1** (0.27 g, 1 mmol) with 5-chloro-2-hydroxybenzaldehyde, (0.18 g, 1.2 mmol) as a colourless solid.

Mp: 81-82 °C; Yield: 0.23 g (56%); <sup>1</sup>H NMR (300 MHz, CDCl<sub>3</sub> + DMSO-d<sub>6</sub>):  $\delta$  10.3 (s, 1H, Ph-OH), 8.20 (d, *J* = 16.2 Hz, 1H, Alk-H), 7.81 (s, 1H, Ar-H), 7.53 (d, *J* = 7.8 Hz, 1H, Ar-H), 7.28 (d, *J* = 8.4 Hz, 1H, Ar-H), 7.21 (d, *J* = 15.9 Hz, 1H, Alk-H), 5.26 (bs, 1H, Sac-H), 5.01-4.93 (m, 2H, Sac-H), 4.50 (bs, 1H, Sac-H), 4.29 (bs, 1H, Sac-H), 4.02 (bs, 1H, Sac-H), 3.80-3.51 (m, 2H, Sac-H), 3.30-3.20 (m, 2H, -CH<sub>2</sub>), 2.02 (bs, 2H, -CH<sub>2</sub>), 1.86-1.81 (m, 2H, -CH<sub>2</sub>), 1.32-1.30 (m, 3H, -CH<sub>3</sub>); <sup>13</sup>C NMR (75 MHz, CDCl<sub>3</sub> + DMSO-d<sub>6</sub>):  $\delta$  202.9, 160.6, 142.2, 135.7, 132.4, 131.8, 128.8, 127.8, 122.6, 107.0, 85.4, 81.3,

80.0, 79.5, 75.4, 73.1, 48.0, 41.0, 22.1, 18.7; Elemental analysis Anal. Calc. for  $C_{20}H_{25}ClO_7$ : C, 58.18; H, 6.10%. Found: C, 58.23; H, 6.14.

**2.1g Synthesis, physicochemical and spectral data of (*E*)-1-(4,6-*O*-butylidene- $\beta$ -D-glucopyranosyl)-4-(3-bromo-2-hydroxyphenyl)-but-3-en-2-one (11):**

Compound, **11** was obtained by the reaction of aldol condensation of 4,6-*O*-butylidene- $\beta$ -D-glucopyranosyl-propane-2-one, **1** (0.27 g, 1 mmol) with 3-bromo-2-hydroxybenzaldehyde, (0.24 g, 1.2 mmol) as a colourless solid.

Mp: 146-148 °C; Yield: 0.23 g (50%);  $^1H$  NMR (300 MHz,  $CDCl_3$  +  $DMSO-d_6$ ):  $\delta$  10.5 (s, 1H, Ph-OH), 8.51 (d,  $J = 16.2$  Hz, 1H, Alk-H), 8.26-8.25 (m, 1H, Ar-H), 7.96 (q,  $J = 8.7$  Hz, 1H, Ar-H), 7.55-7.49 (m, 2H, Alk-H, Ar-H), 5.34 (d,  $J = 4.2$  Hz, 1H, Sac-OH), 5.24 (t,  $J = 5.0$  Hz, 1H, Sac-H), 5.05 (d,  $J = 2.7$  Hz, 1H, Sac-OH), 4.80 (dd,  $J = 3.9$  Hz,  $J = 9.9$  Hz, 1H, Sac-H), 4.62 (t,  $J = 8.3$  Hz, 1H, Sac-H), 4.36 (t,  $J = 8.5$  Hz, 1H, Sac-H), 4.11 (t,  $J = 9.8$  Hz, 1H, Sac-H), 4.03-3.95 (m, 3H, Sac-H), 3.84 (dd,  $J = 2.7$  Hz,  $J = 15.9$  Hz, 1H, -CH<sub>2</sub>), 3.56 (dd,  $J = 8.7$  Hz,  $J = 16.2$  Hz, 1H, -CH<sub>2</sub>), 2.38-2.30 (m, 2H, -CH<sub>2</sub>), 2.13 (q,  $J = 7.5$  Hz, 2H, -CH<sub>2</sub>), 1.61 (t,  $J = 7.2$  Hz, 3H, -CH<sub>3</sub>);  $^{13}C$  NMR (75 MHz,  $CDCl_3$  +  $DMSO-d_6$ ):  $\delta$  193.0, 151.0, 132.3, 128.6, 125.4, 121.9, 118.4, 113.1, 106.1, 97.0, 75.3, 71.2, 69.9, 69.6, 65.4, 63.1, 38.0, 31.0, 12.2, 8.7; Elemental analysis Anal. Calc. for  $C_{20}H_{25}BrO_7$ : C, 52.53; H, 5.51%. Found: C, 52.56; H, 5.54.

**2.1h Synthesis, physicochemical and spectral data of (*E*)-1-(4,6-*O*-butylidene- $\beta$ -D-glucopyranosyl)-4-(4-formylphenyl)-but-3-en-2-one (12):**

Compound, **12** was obtained by the aldol condensation of 4,6-*O*-butylidene- $\beta$ -D-glucopyranosyl-propane-2-one, **1** (0.27 g, 1 mmol) with terephthalaldehyde, (0.16 g, 1.2 mmol) as a yellow solid.

Mp: 190-192 °C; Yield: 0.27 g (69%);  $^1H$  NMR (300 MHz,  $CDCl_3$ ):  $\delta$  10.04 (s, 1H, -CHO), 7.92 (d,  $J = 8.4$  Hz, 2H, Ar-H), 7.75 (d,  $J = 8.4$  Hz, 2H, Ar-H), 7.59 (d,  $J = 16.2$  Hz, 1H, Alk-H), 6.88 (d,  $J = 16.2$  Hz, 1H, Alk-H), 4.86 (d,  $J = 4.5$  Hz, 1H, Sac-OH), 4.57 (d,  $J = 3.3$  Hz, 1H, Sac-OH), 4.54 (t,  $J = 5.1$  Hz, 1H, Sac-H), 4.08 (dd,  $J = 3.9$  Hz,  $J = 9.8$  Hz, 1H, Sac-H), 3.90 (t,  $J = 9.2$  Hz, 1H, Sac-H), 3.65 (t,  $J = 8.7$  Hz, 1H, Sac-H), 3.41 (t,  $J = 9.8$  Hz, 1H, Sac-H), 3.35-3.24 (m, 4H, Sac-H, -CH<sub>2</sub>), 3.18 (dd,  $J = 2.7$  Hz,  $J = 15.9$  Hz,

1H, -CH<sub>2</sub>), 1.65-1.59 (m, 2H, -CH<sub>2</sub>), 1.42 (q, *J* = 7.5 Hz, 2H, -CH<sub>2</sub>), 0.91 (t, *J* = 7.4 Hz, 3H, -CH<sub>3</sub>); <sup>13</sup>C NMR (75 MHz, CDCl<sub>3</sub>): δ 197.4, 191.4, 141.6, 140.1, 137.4, 130.2, 128.8, 102.5, 80.4, 76.0, 75.4, 74.4, 70.6, 68.3, 43.7, 36.2, 17.5, 13.9; Elemental analysis Anal. Calc. for C<sub>21</sub>H<sub>26</sub>O<sub>7</sub>: C, 64.60; H, 6.71%. Found: C, 64.65; H, 6.74.

### **2.1i Synthesis, physicochemical and spectral data of (*E*)-1-(4,6-*O*-butylidene-β-D-glucopyranosyl)-4-(4-cyanophenyl)-but-3-en-2-one (13):**

Compound, **13** was obtained by the aldol condensation of 4,6-*O*-butylidene-β-D-glucopyranosyl-propane-2-one, **1** (0.27 g, 1 mmol) with 4-cyanobenzaldehyde, (0.15 g, 1.2 mmol) as a yellow solid.

Mp: 172-174 °C; Yield: 0.23 g (59%); <sup>1</sup>H NMR (300 MHz, CDCl<sub>3</sub> + DMSO-*d*<sub>6</sub>): δ 7.71-7.62 (m, 4H, Ar-H), 7.55 (d, *J* = 16.2 Hz, 1H, Alk-H), 6.82 (d, *J* = 15.9 Hz, 1H, Alk-H), 4.53 (t, *J* = 5.1 Hz, 1H, Ace-H), 4.12 (dd, *J* = 3.9 Hz, *J* = 9.6 Hz, 1H, Sac-H), 3.97-3.90 (m, 1H, Sac-H), 3.72 (t, *J* = 8.9 Hz, 1H, Sac-H), 3.44-3.30 (m, 3H, Sac-H), 3.23 (t, *J* = 9.0 Hz, 1H, Sac-H), 3.15 (dd, *J* = 3.3 Hz, *J* = 16.2 Hz, 1H, -CH<sub>2</sub>), 2.92 (dd, *J* = 7.8 Hz, *J* = 16.1 Hz, 1H, -CH<sub>2</sub>), 1.66-1.59 (m, 2H, -CH<sub>2</sub>), 1.42 (q, *J* = 7.8 Hz, 2H, -CH<sub>2</sub>), 0.92 (t, *J* = 7.2 Hz, 3H, -CH<sub>3</sub>); <sup>13</sup>C NMR (75 MHz, CDCl<sub>3</sub> + DMSO-*d*<sub>6</sub>): δ 197.3, 140.8, 138.7, 132.7, 129.1, 128.7, 118.3, 113.7, 102.5, 80.4, 76.0, 75.3, 74.3, 70.6, 68.3, 43.7, 36.2, 17.5, 13.9; Elemental analysis Anal. Calc. for C<sub>21</sub>H<sub>25</sub>NO<sub>6</sub>: C, 65.10; H, 6.50%. Found: C, 65.16; H, 6.55.

### **2.1j Synthesis, physicochemical and spectral data of (*E*)-1-(4,6-*O*-butylidene-β-D-glucopyranosyl)-4-(4-carboxyphenyl)-but-3-en-2-one (14):**

Compound, **14** was obtained by the aldol condensation of 4,6-*O*-butylidene-β-D-glucopyranosyl-propane-2-one, **1** (0.27 g, 1 mmol) with 4-carboxybenzaldehyde, (0.18 g, 1.2 mmol) as a colourless solid.

Mp: 184-186 °C; Yield: 0.24 g (59%); <sup>1</sup>H NMR (300 MHz, CDCl<sub>3</sub> + DMSO-*d*<sub>6</sub>): δ 8.04 (d, *J* = 8.4 Hz, 2H, Ar-H), 7.64 (d, *J* = 8.4 Hz, 2H, Ar-H), 7.58 (d, *J* = 16.2 Hz, 1H, Alk-H), 6.85 (d, *J* = 16.2 Hz, 1H, Alk-H), 4.53 (t, *J* = 5.1 Hz, 1H, Sac-H), 4.05 (dd, *J* = 4.2 Hz, *J* = 10.1 Hz, 1H, Sac-H), 3.87 (t, *J* = 9.2 Hz, 1H, Sac-H), 3.59 (t, *J* = 8.7 Hz, 1H, Sac-H), 3.26-3.13 (m, 5H, Sac-H, -CH<sub>2</sub>), 2.84 (dd, *J* = 8.7 Hz, 1H, -CH<sub>2</sub>), 1.65-1.57 (m, 2H, -CH<sub>2</sub>), 1.42 (q, *J* = 7.5 Hz, 2H, -CH<sub>2</sub>), 0.90 (t, *J* = 7.4 Hz, 3H, -CH<sub>3</sub>); <sup>13</sup>C NMR(75

MHz, CDCl<sub>3</sub> + DMSO-d<sub>6</sub>):  $\delta$  202.5, 146.1, 143.3, 137.3, 134.9, 133.2, 132.9, 106.8, 85.6, 81.6, 79.6, 79.4, 75.4, 73.0, 48.4, 41.1, 22.2, 18.8; Elemental analysis Anal. Calc. for C<sub>21</sub>H<sub>26</sub>O<sub>8</sub>: C, 62.06; H, 6.45%. Found: C, 62.10; H, 6.49.

**2.1k Synthesis, physicochemical and spectral data of (*E*)-1-(4,6-*O*-butylidene- $\beta$ -D-glucopyranosyl)-4-(5-bromo-2-hydroxy-3-formylphenyl)-but-3-en-2-one (15):**

Compound, **15** was obtained by the aldol condensation of 4,6-*O*-butylidene- $\beta$ -D-glucopyranosyl-propane-2-one, **1** (0.27 g, 1 mmol) with 5-bromo-2-hydroxy-3-formyl benzaldehyde, (0.27 g, 1.2 mmol) as a colourless crystalline solid.

Mp: 236-238 °C; Yield: 0.32 g (65%); <sup>1</sup>H NMR (300 MHz, CDCl<sub>3</sub> + DMSO-d<sub>6</sub>):  $\delta$  9.95 (s, 1H, -CHO), 7.89 (d, *J* = 16.5 Hz, 1H, Alk-H), 7.76 (s, 1H, Ar-H), 7.71 (s, 1H, Ar-H), 6.94 (d, *J* = 16.5 Hz, 1H, Alk-H), 5.22 (s, 1H, Sac-OH), 5.01 (s, 1H, Sac-OH), 4.51 (t, *J* = 5.0 Hz, 1H, Sac-H), 4.03 (dd, *J* = 3.3 Hz, *J* = 9.5 Hz, 1H, Sac-H), 3.84 (t, *J* = 8.1 Hz, 1H, Sac-H), 3.23-3.10 (m, 6H, Sac-H, -CH<sub>2</sub>), 2.81 (dd, *J* = 9.0 Hz, *J* = 15.6 Hz, 1H, -CH<sub>2</sub>), 1.58-1.57 (m, 2H, -CH<sub>2</sub>), 1.40 (q, *J* = 7.5 Hz, 2H, -CH<sub>2</sub>), 0.89 (t, *J* = 7.2 Hz, 3H, -CH<sub>3</sub>); <sup>13</sup>C NMR (75 MHz, CDCl<sub>3</sub> + DMSO-d<sub>6</sub>):  $\delta$  197.6, 194.8, 158.1, 136.8, 136.1, 133.5, 128.8, 126.1, 123.7, 111.3, 101.2, 80.6, 76.7, 74.3, 74.0, 70.3, 67.5, 43.9, 35.9, 17.0, 13.8; ESI-MS: Calc. for C<sub>21</sub>H<sub>25</sub>BrO<sub>8</sub>, 484.07; *m/z* found, 485.08 [M+H]<sup>+</sup>; Elemental analysis Anal. Calc. for C<sub>21</sub>H<sub>25</sub>BrO<sub>8</sub>: C, 51.97; H, 5.19%. Found: C, 52.03; H, 5.24.

**2.1l Synthesis, physicochemical and spectral data of (*E*)-1-(4,6-*O*-butylidene- $\beta$ -D-glucopyranosyl)-4-(3-indolyl)-but-3-en-2-one (16):**

Compound, **16** was obtained by the reaction of aldol condensation of 4,6-*O*-butylidene- $\beta$ -D-glucopyranosyl-propane-2-one, **1** (0.27 g, 1 mmol) with indole-3-carboxaldehyde, (0.17 g, 1.2 mmol) as a yellow solid.

Mp: 195-198 °C; Yield: 0.30 g (75%); <sup>1</sup>H NMR (300 MHz, CDCl<sub>3</sub>):  $\delta$  7.86 (d, *J* = 16.2 Hz, 1H, Alk-H), 7.61 (s, 1H, Ind-H), 7.61 (s, 1H, Alk-H), 7.53-7.47 (m, 2H, Ar-H), 7.24-7.22 (m, 2H, Ar-H), 6.81 (d, *J* = 15.9 Hz, 1H, Alk-H), 4.91 (s, 1H, Sac-OH), 4.64 (s, 1H, Sac-OH), 4.55 (t, *J* = 5.1 Hz, 1H, Sac-H), 4.10 (dd, *J* = 3.3 Hz, *J* = 9.0 Hz, 1H, Sac-H), 3.93 (t, *J* = 7.5 Hz, 1H, Sac-H), 3.65 (t, *J* = 7.5 Hz, 1H, Sac-H), 3.43 (t, *J* = 9.6 Hz, 1H, Sac-H), 3.36-3.26 (m, 3H, Sac-H), 3.15 (dd, *J* = 3.0 Hz, *J* = 18.0 Hz, 1H, -CH<sub>2</sub>), 2.84 (dd, *J* = 8.7 Hz, *J* = 15.6 Hz, 1H, -CH<sub>2</sub>), 1.68-1.59 (m, 2H, -CH<sub>2</sub>), 1.43 (q, *J* = 7.5 Hz, 2H, -

CH<sub>2</sub>), 0.91 (t,  $J = 7.4$  Hz, 3H, -CH<sub>3</sub>); <sup>13</sup>C NMR (75 MHz, CDCl<sub>3</sub>):  $\delta$  202.8, 142.5 (2C), 135.9, 130.1, 127.6, 126.1, 125.9, 124.9, 117.5, 117.2, 107.0, 85.4, 78.0, 79.8, 79.6, 75.4, 73.1, 48.0, 41.0, 22.1, 18.7; Elemental analysis Anal. Calc. for C<sub>22</sub>H<sub>27</sub>NO<sub>6</sub>: C, 65.82; H, 6.78; N, 3.49%. Found: C, 65.86; H, 6.81; N, 3.53.

**2.1m Synthesis, physicochemical and spectral data of (*E*)-1-(4,6-*O*-butylidene- $\beta$ -D-glucopyranosyl)-4-(3-pyrrolyl)-but-3-en-2-one (17):**

Compound, **17** was obtained by the aldol condensation of 4,6-*O*-butylidene- $\beta$ -D-glucopyranosyl-propane-2-one, **1** (0.27 g, 1 mmol) with pyrrole-3-carboxaldehyde, (0.11 g, 1.2 mmol) as a yellow liquid.

Yield: 0.25 g (71%); <sup>1</sup>H NMR (300 MHz, CDCl<sub>3</sub> + DMSO-*d*<sub>6</sub>):  $\delta$  11.1 (s, 1H, -NH), 7.42 (d,  $J = 15.9$  Hz, 1H, Alk-H), 6.93 (s, 1H, Ar-H), 6.57-6.52 (m, 2H, Alk-H, Ar-H), 6.21 (s, 1H, Ar-H), 4.96 (d,  $J = 4.2$  Hz, 1H, Sac-OH), 4.80 (d,  $J = 3.0$  Hz, 1H, Sac-OH), 4.52 (t,  $J = 4.7$  Hz, 1H, Sac-H), 4.04 (dd,  $J = 3.9$  Hz,  $J = 9.6$  Hz, 1H, Sac-H), 3.83 (t,  $J = 9.4$  Hz, 1H, Sac-H), 3.58 (t,  $J = 8.4$  Hz, 1H, Sac-H), 3.38 (t,  $J = 9.6$  Hz, 1H, Sac-H), 3.27-3.18 (m, 3H, Sac-H), 3.09-3.03 (m, 1H, -CH<sub>2</sub>), 2.73 (dd,  $J = 9.0$  Hz,  $J = 15.8$  Hz, 1H, -CH<sub>2</sub>), 1.61-1.59 (m, 2H, -CH<sub>2</sub>), 1.41 (q,  $J = 7.2$  Hz, 2H, -CH<sub>2</sub>), 0.90 (t,  $J = 7.2$  Hz, 3H, -CH<sub>3</sub>); <sup>13</sup>C NMR (75 MHz, CDCl<sub>3</sub> + DMSO-*d*<sub>6</sub>):  $\delta$  197.1, 132.9, 128.2, 123.1, 119.6, 115.0, 110.1, 101.7, 80.2, 76.5, 74.5, 74.3, 70.1, 67.8, 42.5, 35.8, 16.5, 13.5; Elemental analysis Anal. Calc. for C<sub>18</sub>H<sub>25</sub>NO<sub>6</sub>: C, 61.52; H, 7.17%. Found: C, 61.56; H, 7.22.

**2.1n Synthesis, physicochemical and spectral data of (*E*)-1-(4,6-*O*-butylidene- $\beta$ -D-glucopyranosyl)-4-(3-quinolylyl)-but-3-en-2-one (18):**

Compound, **18** was obtained by the aldol condensation of 4,6-*O*-butylidene- $\beta$ -D-glucopyranosyl-propane-2-one, **1** (0.27 g, 1 mmol) with quinoline-3-carbaldehyde, (0.19 g, 1.2 mmol) as a colourless solid.

Mp: 240-243 °C; Yield: 0.38 g (93%); <sup>1</sup>H NMR (300 MHz, CDCl<sub>3</sub>):  $\delta$  8.27 (d,  $J = 8.4$  Hz, 1H, Ar-H), 8.06 (d,  $J = 8.4$  Hz, 1H, Ar-H), 7.89 (d,  $J = 7.8$  Hz, 1H, Ar-H), 7.77-7.69 (m, 3H, Alk-H, Ar-H), 7.59 (t,  $J = 7.4$  Hz, 1H, Ar-H), 7.27 (d,  $J = 16.2$  Hz, 1H, Alk-H), 5.21 (d,  $J = 5.1$  Hz, 1H, Sac-OH), 5.06 (d,  $J = 3.6$  Hz, 1H, Sac-OH), 4.52 (t,  $J = 4.7$  Hz, 1H, Sac-H), 4.03 (dd,  $J = 3.3$  Hz,  $J = 9.8$  Hz, 1H, Sac-H), 3.89 (t,  $J = 8.3$  Hz, 1H, Sac-H), 3.56-3.52 (m, 1H, Sac-H), 3.42-3.20 (m, 5H, Sac-H, -CH<sub>2</sub>), 2.91 (dd,



$J = 9.0$  Hz,  $J = 16.2$  Hz, 1H, -CH<sub>2</sub>), 1.60-1.57 (m, 2H, -CH<sub>2</sub>), 1.41 (q,  $J = 7.5$  Hz, 2H, -CH<sub>2</sub>), 0.90 (t,  $J = 7.2$  Hz, 3H, -CH<sub>3</sub>); <sup>13</sup>C NMR (75 MHz, CDCl<sub>3</sub>):  $\delta$  197.6, 153.0, 147.7, 141.6, 136.5, 130.8, 129.7, 129.1, 127.6, 127.3, 127.0, 120.2, 101.6, 80.4, 76.4, 74.3, 74.2, 70.2, 67.8, 43.2, 35.8, 16.9, 13.6; Elemental analysis Anal. Calc. for C<sub>23</sub>H<sub>27</sub>NO<sub>6</sub>: C, 66.81; H, 6.58; N, 3.39%. Found: C, 66.84; H, 6.62; N, 3.43.

### **2.1o Synthesis, physicochemical and spectral data of (*E*)-1-(4,6-*O*-butylidene-2,3-diacetyl- $\beta$ -D-glucopyranosyl)-4-(4-bromophenyl)-but-3-en-2-one (19):**

Compound, **19** was obtained as a colourless crystalline solid by the acetylation of sugar chalcone, **5** (0.44 g, 1 mmol) using NaOAc (0.25 g, 3 mmol) and Ac<sub>2</sub>O (4 ml, 40 mmol).

Mp: 158-160 °C; Yield: 0.45 g (85%); <sup>1</sup>H NMR (300 MHz, CDCl<sub>3</sub>):  $\delta$  7.55-7.39 (m, 5H, Ar-H, Alk-H), 6.70 (d,  $J = 15.9$  Hz, 1H, Alk-H), 5.23 (t,  $J = 9.2$  Hz, 1H, Sac-H), 4.93 (t,  $J = 9.5$  Hz, 1H, Sac-H), 4.48 (t,  $J = 5.1$  Hz, 1H, Sac-H), 4.19-4.13 (m, 2H, Sac-H), 3.41-3.39 (m, 2H, Sac-H), 2.92 (dd,  $J = 8.7$  Hz,  $J = 16.4$  Hz, 1H, -CH<sub>2</sub>), 2.65 (dd,  $J = 3.3$  Hz,  $J = 16.2$  Hz, 1H, -CH<sub>2</sub>), 2.06 (s, 3H, -COCH<sub>3</sub>), 2.03 (s, 3H, -COCH<sub>3</sub>), 1.59-1.56 (m, 2H, -CH<sub>2</sub>), 1.37 (q,  $J = 7.8$  Hz, 2H, -CH<sub>2</sub>), 0.89 (t,  $J = 7.4$  Hz, 3H, -CH<sub>3</sub>); <sup>13</sup>C NMR (75 MHz, CDCl<sub>3</sub>):  $\delta$  195.9, 170.2 (2C), 142.2, 132.3, 129.7, 126.6, 102.6, 78.4, 74.5, 73.1, 72.5, 70.8, 68.1, 43.0, 36.0, 20.8 (2C), 17.4, 13.8; Elemental analysis Anal. Calc. for C<sub>24</sub>H<sub>29</sub>BrO<sub>8</sub>: C, 54.87; H, 5.56%. Found: C, 54.92; H, 5.60.

### **2.1p Synthesis, physicochemical and spectral data of (*E*)-1-(4,6-*O*-butylidene-2,3-diacetyl- $\beta$ -D-glucopyranosyl)-4-(4-fluorophenyl)-but-3-en-2-one (20):**

Compound, **20** was obtained as a yellow solid by the acetylation of sugar chalcone, **6** (0.38 g, 1 mmol) using NaOAc (0.25 g, 3 mmol) and Ac<sub>2</sub>O (4 ml, 40 mmol).

Mp: 58-60 °C; Yield: 0.38 g (83%); <sup>1</sup>H NMR (300 MHz, CDCl<sub>3</sub>):  $\delta$  7.56-7.51 (m, 3H, Alk-H, Ar-H), 7.09 (t,  $J = 8.6$  Hz, 2H, Ar-H), 6.65 (d,  $J = 16.2$  Hz, 1H, Alk-H), 5.23 (t,  $J = 7.2$  Hz, 1H, Sac-H), 4.94 (t,  $J = 9.5$  Hz, 1H, Sac-H), 4.48 (t,  $J = 5.3$  Hz, 1H, Sac-H), 4.21-4.13 (m, 2H, Sac-H), 4.42-3.40 (m, 3H, Sac-H), 2.93 (dd,  $J = 8.4$  Hz,  $J = 16.1$  Hz, 1H, -CH<sub>2</sub>), 2.65 (dd,  $J = 3.3$  Hz,  $J = 16.2$  Hz, 1H, -CH<sub>2</sub>), 2.06 (s, 3H, -OCOCH<sub>3</sub>), 2.03 (s, 3H, -OCOCH<sub>3</sub>), 1.63-1.56 (m, 2H, -CH<sub>2</sub>), 1.37 (q,  $J = 7.5$  Hz, 2H, -CH<sub>2</sub>), 0.89 (t,  $J = 6.3$  Hz, 3H, -CH<sub>3</sub>); <sup>13</sup>C NMR (75 MHz, CDCl<sub>3</sub>):  $\delta$  195.8, 170.1, 169.6, 150.1, 138.4, 130.5,

124.7, 116.8, 102.4, 78.4, 74.5, 73.0, 72.6, 72.4, 71.8, 70.7, 42.8, 36.0, 20.8, 20.6, 17.3, 13.8; Elemental analysis Anal. Calc. for C<sub>24</sub>H<sub>29</sub>FO<sub>8</sub>: C, 62.06; H, 6.29%. Found: C, 62.10; H, 6.32.

**2.1q Synthesis, physicochemical and spectral data of (*E*)-1-(4,6-*O*-butylidene 2,3-diacetyl- $\beta$ -D-glucopyranosyl)-4-(4-allyloxyphenyl)-but-3-en-2-one (21):**

Compound, **21** was obtained as a colourless solid by the acetylation of sugar chalcone, **7** (0.42 g, 1 mmol) using NaOAc (0.25 g, 3 mmol) and Ac<sub>2</sub>O (4 ml, 40 mmol).

Mp: 126-128 °C; Yield: 0.40 g (80%); <sup>1</sup>H NMR (300 MHz, CDCl<sub>3</sub>):  $\delta$  7.50 (t, 3H, Ar-H, Alk-H), 6.93 (d, *J* = 8.7 Hz, 2H, Ar-H), 6.61 (d, *J* = 16.2 Hz, 1H, Alk-H), 6.12-5.99 (m, 1H, Alk-H), 5.42 (d, *J* = 17.3 Hz, 1H, Alk-H), 5.32 (d, *J* = 10.5 Hz, 1H, Alk-H), 5.23 (t, *J* = 9.2 Hz, 1H, Sac-H), 4.94 (t, *J* = 9.6 Hz, 1H, Sac-H), 4.58 (d, *J* = 5.1 Hz, 2H, -CH<sub>2</sub>), 4.48 (t, *J* = 5.1 Hz, 1H, Sac-H), 4.20-4.14 (m, 2H, Sac-H), 3.40-3.42 (m, 3H, Sac-H), 2.91 (dd, *J* = 8.4 Hz, *J* = 16.2 Hz, 1H, -CH<sub>2</sub>), 2.63 (dd, *J* = 3.3 Hz, *J* = 16.1 Hz, 1H, -CH<sub>2</sub>), 2.06 (s, 3H, -COCH<sub>3</sub>), 2.03 (s, 3H, -COCH<sub>3</sub>), 1.43-1.40 (m, 2H, -CH<sub>2</sub>), 1.37 (q, *J* = 8.1 Hz, 2H, -CH<sub>2</sub>), 0.89 (t, *J* = 7.4 Hz, 3H, -CH<sub>3</sub>); <sup>13</sup>C NMR (75 MHz, CDCl<sub>3</sub>):  $\delta$  196.0, 170.3, 170.2, 160.9, 143.5, 132.7, 130.2, 127.1, 124.1, 118.1, 115.3, 102.6, 78.5, 74.8, 73.2, 72.6, 70.8, 68.9, 68.2, 42.8, 36.1, 20.8 (2C), 17.5, 13.9; Elemental analysis Anal. Calc. for C<sub>27</sub>H<sub>34</sub>O<sub>9</sub>: C, 64.53; H, 6.82%. Found: C, 64.58; H, 6.85.

**2.1r Synthesis, physicochemical and spectral data of (*E*)-1-(4,6-*O*-butylidene-2,3-diacetyl- $\beta$ -D-glucopyranosyl)-4-(3,4-dioxanophenyl)-but-3-en-2-one (22):**

Compound, **22** was obtained as a yellow solid by the acetylation of its corresponding sugar chalcone, (0.41 g, 1 mmol) using NaOAc (0.25 g, 3 mmol) and Ac<sub>2</sub>O (4 ml, 40 mmol).

Mp: 114-116 °C; Yield: 0.40 g (82%); <sup>1</sup>H NMR (300 MHz, CDCl<sub>3</sub>):  $\delta$  7.45 (d, *J* = 16.2 Hz, 1H, Alk-H), 7.04-7.02 (m, 2H, Ar-H), 6.83 (d, *J* = 8.7 Hz, 1H, Ar-H), 6.56 (d, *J* = 15.9 Hz, 1H, Alk-H), 6.02 (s, 2H, -OCH<sub>2</sub>), 5.23 (t, *J* = 9.3 Hz, 1H, Sac-H), 4.93 (t, *J* = 9.5 Hz, 1H, Sac-H), 4.48 (t, *J* = 5.1 Hz, 1H, Sac-H), 4.19-4.13 (m, 2H, Sac-H), 3.41-3.39 (m, 3H, Sac-H), 2.90 (dd, *J* = 8.7 Hz, *J* = 16.1 Hz, 1H, -CH<sub>2</sub>), 2.63 (dd, *J* = 3.3 Hz, *J* = 16.1 Hz, 1H, -CH<sub>2</sub>), 2.06 (s, 3H, -COCH<sub>3</sub>), 2.03 (s, 3H, -COCH<sub>3</sub>),

1.63-1.56 (m, 2H, -CH<sub>2</sub>), 1.37 (q, *J* = 7.5 Hz, 2H, -CH<sub>2</sub>), 0.89 (t, *J* = 7.4 Hz, 3H, -CH<sub>3</sub>); <sup>13</sup>C NMR (75 MHz, CDCl<sub>3</sub>): δ 195.9, 170.2 (2C), 150.1, 148.5, 143.4, 128.7, 125.2, 124.3, 108.7, 106.6, 102.6, 101.7, 78.5, 74.7, 73.1, 72.5, 70.7, 68.2, 42.9, 36.0, 20.8, 17.4, 13.8; Elemental analysis Anal. Calc. for C<sub>25</sub>H<sub>30</sub>O<sub>10</sub>: C, 61.22; H, 6.16%. Found: C, 61.26; H, 6.19.

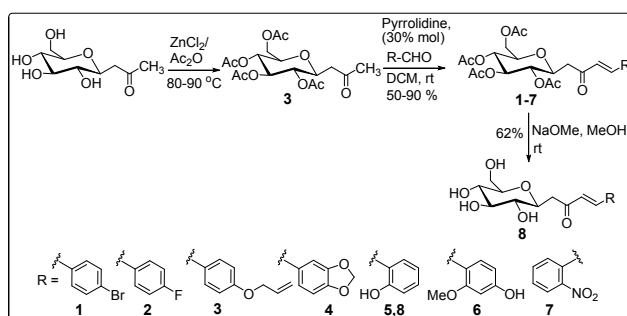

Scheme 1 Synthesis of sugar-chalcone derivatives, 1-8.

### 2.1s Synthesis, physicochemical and spectral data of (*E*)-1-(2,3,4,6-tetra-*O*-acetyl-β-*D*-glucopyranosyl)-4-(4-bromophenyl)-but-3-en-2-one (1):

Compound, **1** was obtained by the aldol condensation of 2,3,4,6-tetra-*O*-acetyl-β-*D*-glucopyranosyl-propane-2-one, **3** (0.39 g, 1 mmol) with 4-bromobenzaldehyde, (0.22 g, 1.2 mmol) as a colourless crystalline solid.

Mp: 138-142 °C; Yield: 0.48 g (86%); <sup>1</sup>H NMR (300 MHz, CDCl<sub>3</sub>): δ 7.56-7.40 (m, 5H, Alk-H, Ar-H), 6.72 (d, *J* = 16.2 Hz, 1H, Alk-H), 5.23 (t, *J* = 9.3 Hz, 1H, Sac-H), 5.07 (t, *J* = 9.6 Hz, 1H, Sac-H), 4.98 (t, *J* = 9.8 Hz, 1H, Sac-H), 4.26 (dd, *J* = 4.8 Hz, *J* = 12.5 Hz, 1H, Sac-H), 4.15-4.08 (m, 1H, Sac-H), 4.02 (dd, *J* = 2.1 Hz, *J* = 12.3 Hz, 1H, Sac-H), 3.75-3.69 (m, 1H, Sac-H), 3.02 (dd, *J* = 8.4 Hz, *J* = 16.5 Hz, 1H, -CH<sub>2</sub>), 2.67 (dd, *J* = 3.0 Hz, *J* = 16.4 Hz, 1H, -CH<sub>2</sub>), 2.03-2.02 (m, 12H, -COCH<sub>3</sub>); <sup>13</sup>C NMR (75 MHz, CDCl<sub>3</sub>): δ 195.9, 170.6, 170.2, 170.0, 169.6, 142.3, 133.1, 132.3, 129.7, 126.7, 125.1, 75.8, 74.2, 74.1, 71.7, 68.5, 62.0, 42.7, 20.7 (2C), 20.6 (2C); Elemental analysis Anal. Calc. for C<sub>24</sub>H<sub>27</sub>BrO<sub>10</sub>: C, 51.90; H, 4.90%. Found: C, 51.95; H, 4.94.

### 2.2t Synthesis, physicochemical and spectral data of (*E*)-1-(2,3,4,6-tetra-*O*-acetyl-β-*D*-glucopyranosyl)-4-(4-fluorophenyl)-but-3-en-2-one (2):

Compound, **2** was obtained by the aldol condensation of 2,3,4,6-tetra-*O*-acetyl-β-*D*-glucopyranosyl-propane-2-one, **3** (0.39 g, 1 mmol) with 4-fluorobenzaldehyde, (0.15

g, 1.2 mmol) as a colourless crystalline solid.

Mp: 128-130 °C; Yield: 0.37 g (76%); <sup>1</sup>H NMR (300 MHz, CDCl<sub>3</sub>): δ 7.57-7.46 (m, 3H, Alk-H, Ar-H), 7.09 (d, *J* = 8.4 Hz, 2H, Ar-H), 6.66 (d, *J* = 16.2 Hz, 1H, Alk-H), 5.24 (t, *J* = 9.3 Hz, 1H, Sac-H), 5.08 (t, *J* = 9.6 Hz, 1H, Sac-H), 4.98 (t, *J* = 9.6 Hz, 1H, Sac-H), 4.26 (dd, *J* = 4.8 Hz, *J* = 12.3 Hz, 1H, Sac-H), 4.13-4.09 (m, 1H, Sac-H), 4.02 (dd, *J* = 2.1 Hz, *J* = 12.3 Hz, 1H, Sac-H), 3.73-3.69 (m, 1H, Sac-H), 3.02 (dd, *J* = 8.4 Hz, *J* = 16.2 Hz, 1H, -CH<sub>2</sub>), 2.67 (dd, *J* = 3.0 Hz, *J* = 16.4 Hz, 1H, -CH<sub>2</sub>), 2.03-1.98 (m, 12H, -COCH<sub>3</sub>); <sup>13</sup>C NMR (75 MHz, CDCl<sub>3</sub>): δ 195.9, 170.6, 170.2, 170.0, 169.5, 142.4, 130.5, 130.3, 125.9, 116.4, 116.1, 76.6, 75.8, 74.2, 71.8, 68.6, 62.1, 42.7, 20.7, 20.6 (3C); Elemental analysis Anal. Calc. for C<sub>24</sub>H<sub>27</sub>FO<sub>10</sub>: C, 58.30; H, 5.50%. Found: C, 58.34; H, 5.54.

### **2.2u Synthesis, physicochemical and spectral data of (*E*)-1-(2,3,4,6-tetra-*O*-acetyl-β-D-glucopyranosyl)-4-(4-allyloxyphenyl)-but-3-en-2-one (3):**

Compound, **3** was obtained by the aldol condensation of 2,3,4,6-tetra-*O*-acetyl-β-D-glucopyranosyl-propane-2-one, **3** (0.39 g, 1 mmol) with 4-allyloxybenzaldehyde, (0.20 g, 1.2 mmol) as a colourless solid.

Mp: 90-94 °C; Yield: 0.39 g (74%); <sup>1</sup>H NMR (300 MHz, CDCl<sub>3</sub>): δ 7.55-7.50 (m, 3H, Ar-H, Alk-H), 6.95 (d, *J* = 8.4 Hz, 2H, Ar-H), 6.64 (d, *J* = 16.2 Hz, 1H, Alk-H), 6.13-6.00 (m, 1H, Alk-H), 5.44 (d, *J* = 17.1 Hz, 1H Alk-H), 5.33 (d, *J* = 10.5 Hz, 1H, Alk-H), 5.24 (t, *J* = 9.5 Hz, 1H, Sac-H), 5.09 (t, *J* = 9.8 Hz, 1H, Sac-H), 5.00 (t, *J* = 9.6 Hz, 1H, Sac-H), 4.60 (d, *J* = 5.4 Hz, 2H, -CH<sub>2</sub>), 4.27 (dd, *J* = 5.1 Hz, *J* = 12.5 Hz, 1H, Sac-H), 4.17-4.10 (m, 1H, Sac-H), 4.06-4.01 (m, 1H, Sac-H), 3.76-3.71 (m, 1H, Sac-H), 3.01 (dd, *J* = 8.4 Hz, *J* = 16.2 Hz, 1H, -CH<sub>2</sub>), 2.67 (dd, *J* = 3 Hz, *J* = 16.1 Hz, 1H, -CH<sub>2</sub>), 2.04-2.02 (m, 12H, -COCH<sub>3</sub>); <sup>13</sup>C NMR (75 MHz, CDCl<sub>3</sub>): δ 196.0, 170.6, 170.2, 170.0, 169.5, 160.8, 143.5, 132.7, 130.2, 127.0, 124.1, 118.0, 115.2, 75.7, 74.2, 71.7, 68.8, 68.5, 62.1, 42.5, 20.7 (2C), 20.6 (2C); Elemental analysis Anal. Calc. for C<sub>27</sub>H<sub>32</sub>O<sub>11</sub>: C, 60.90; H, 6.06%. Found: C, 60.94; H, 6.12.

### **2.2v Synthesis, physicochemical and spectral data of (*E*)-1-(2,3,4,6-tetra-*O*-acetyl-β-D-glucopyranosyl)-4-(3,4-dioxanophenyl)-but-3-en-2-one (4):**

Compound, **4** was obtained by the aldol condensation of 2,3,4,6-tetra-*O*-acetyl-β-D-

glucopyranosyl-propane-2-one, **3** (0.39 g, 1 mmol) with piperonyl aldehyde, (0.18 g, 1.2 mmol) as a yellow solid.

Mp: 112-114 °C; Yield: 0.37 g (71%); <sup>1</sup>H NMR (300 MHz, CDCl<sub>3</sub>): δ 7.47 (d, *J* = 16.2 Hz, 1H, Alk-H), 7.06-7.03 (m, 2H, Ar-H), 6.83 (d, *J* = 8.1 Hz, 1H, Ar-H), 6.57 (d, *J* = 16.2 Hz, 1H, Alk-H), 6.03 (s, 2H, -OCH<sub>2</sub>), 5.23 (t, *J* = 9.3 Hz, 1H, Sac-H), 5.08 (t, *J* = 9.8 Hz, 1H, Sac-H), 4.98 (t, *J* = 9.6 Hz, 1H, Sac-H), 4.26 (dd, *J* = 4.8 Hz, *J* = 12.6 Hz, 1H, Sac-H), 4.13-4.11 (m, 1H, Sac-H), 4.12 (dd, *J* = 1.2 Hz, *J* = 12.5 Hz, 1H, Sac-H), 3.73-3.70 (m, 1H, Sac-H), 2.99 (dd, *J* = 8.4 Hz, *J* = 16.2 Hz, 1H, -CH<sub>2</sub>), 2.66 (dd, *J* = 3.3 Hz, *J* = 16.2 Hz, 1H, -CH<sub>2</sub>), 2.03-2.01 (m, 12H, -COCH<sub>3</sub>); <sup>13</sup>C NMR (75 MHz, CDCl<sub>3</sub>): δ 196.0, 170.7, 170.2, 170.0, 169.6, 150.1, 148.5, 143.6, 128.6, 125.3, 124.3, 108.7, 106.6, 101.7, 75.7, 74.2, 71.7, 68.5, 62.1, 42.6, 20.7 (2C), 20.6 (2C); Elemental analysis Anal. Calc. for C<sub>25</sub>H<sub>28</sub>O<sub>12</sub>: C, 57.69; H, 5.42%. Found: C, 57.73; H, 5.45.

### **2.2w Synthesis, physicochemical and spectral data of (E)-1-(2,3,4,6-tetra-*O*-acetyl-β-D-glucopyranosyl)-4-(2-hydroxyphenyl)-but-3-en-2-one (5):**

Compound, **5** was obtained by the aldol condensation of 2,3,4,6-tetra-*O*-acetyl-β-D-glucopyranosyl-propane-2-one, **3** (0.39 g, 1 mmol) with salicylaldehyde, (0.15 g, 1.2 mmol) as a colourless solid.

Mp: 138-140 °C; Yield: 0.37 g (76%); <sup>1</sup>H NMR (300 MHz, CDCl<sub>3</sub>): δ 7.87 (d, *J* = 16.2 Hz, 1H, Alk-H), 7.51 (d, *J* = 7.8 Hz, 1H, Ar-H), 7.32-7.27 (m, 1H, Ar-H), 6.97 (t, *J* = 7.4 Hz, 1H, Ar-H), 6.91-6.85 (m, 2H, Ar-H, Alk-H), 6.18 (s, 1H, Ph-OH), 5.25 (t, *J* = 9.3 Hz, 1H, Sac-H), 5.10 (t, *J* = 9.6 Hz, 1H, Sac-H), 5.02 (t, *J* = 9.6 Hz, 1H, Sac-H), 4.30 (dd, *J* = 5.1 Hz, *J* = 12.5 Hz, 1H, Sac-H), 4.17-4.10 (m, 1H, Sac-H), 4.05 (dd, *J* = 2.1 Hz, *J* = 12.3 Hz, 1H, Sac-H), 3.76-3.71 (m, 1H, Sac-H), 3.07 (dd, *J* = 8.1 Hz, *J* = 16.1 Hz, 1H, -CH<sub>2</sub>), 2.71 (dd, *J* = 3.3 Hz, *J* = 15.9 Hz, 1H, -CH<sub>2</sub>), 2.05-2.02 (m, 12H, -COCH<sub>3</sub>); <sup>13</sup>C NMR (75 MHz, CDCl<sub>3</sub>): δ 197.6, 171.0, 170.3, 170.2, 169.7, 155.8, 139.9, 132.1, 129.3, 126.9, 121.6, 120.9, 116.6, 75.7, 74.4, 74.2, 71.8, 68.6, 62.2, 42.2, 20.8 (2C), 20.6 (2C); Elemental analysis Anal. Calc. for C<sub>24</sub>H<sub>28</sub>O<sub>11</sub>: C, 58.53; H, 5.73%. Found: C, 58.57; H, 5.76.

### **2.2x Synthesis, physicochemical and spectral data of (E)-1-(2,3,4,6-tetra-*O*-**

**acetyl- $\beta$ -D-glucopyranosyl)-4-(4-hydroxy-2-methoxyphenyl)-but-3-en-2-one (6):**

Compound, **6** was obtained by the aldol condensation of 2,3,4,6-tetra-*O*-acetyl- $\beta$ -D-glucopyranosyl-propane-2-one, **3** (0.39 g, 1 mmol) with vanillin, (0.18 g, 1.2 mmol) as a colourless crystalline solid.

Mp: 100-102 °C; Yield: 0.43 g (83%); <sup>1</sup>H NMR (300 MHz, CDCl<sub>3</sub>):  $\delta$  7.84 (d, *J* = 16.5 Hz, 1H, Alk-H), 7.10 (d, *J* = 7.2 Hz, 1H, Ar-H), 6.90-6.84 (m, 3H, Alk-H, Ar-H), 6.21 (s, 1H, Sac-OH), 5.23 (t, *J* = 9.3 Hz, 1H, Sac-H), 5.08 (t, *J* = 9.6 Hz, 1H, Sac-H), 4.99 (t, *J* = 9.6 Hz, 1H, Sac-H), 4.26 (dd, *J* = 4.8 Hz, *J* = 12.3 Hz, 1H, Sac-H), 4.14 (t, *J* = 9.2 Hz, 1H, Sac-H), 4.03 (d, *J* = 12.3 Hz, 1H, Sac-H), 3.92 (s, 3H, -OCH<sub>3</sub>), 3.75-3.70 (m, 1H, Sac-H), 3.05 (dd, *J* = 8.4 Hz, *J* = 16.2 Hz, 1H, -CH<sub>2</sub>), 2.70 (dd, *J* = 3.3 Hz, *J* = 16.2 Hz, 1H, -CH<sub>2</sub>), 2.02-2.01 (m, 12H, -COCH<sub>3</sub>); <sup>13</sup>C NMR (75 MHz, CDCl<sub>3</sub>):  $\delta$  196.7, 170.7, 170.3, 170.0, 169.6, 146.9, 145.7, 138.7, 127.2, 120.7, 120.6, 119.8, 112.2, 75.7, 74.3, 74.2, 71.7, 68.5, 62.1, 56.2, 42.3, 20.7 (2C), 20.6 (2C); Elemental analysis Anal. Calc. for C<sub>25</sub>H<sub>30</sub>O<sub>12</sub>: C, 57.47; H, 5.79%. Found: C, 57.51; H, 5.83.

**2.2y Synthesis, physicochemical and spectral data of (*E*)-1-(2,3,4,6-tetra-*O*-acetyl- $\beta$ -D-glucopyranosyl)-4-(2-nitrophenyl)-but-3-en-2-one (7):**

Compound, **7** was obtained by the aldol condensation reaction of 2,3,4,6-tetra-*O*-acetyl- $\beta$ -D-glucopyranosyl-propane-2-one, **3** (0.39 g, 1 mmol) with 2-nitrobenzaldehyde, (0.18 g, 1.2 mmol) as a yellow liquid.

Yield: 0.32 g (62%); <sup>1</sup>H NMR (300 MHz, CDCl<sub>3</sub>):  $\delta$  8.08 (d, *J* = 7.8 Hz, 1H, Ar-H), 8.00 (d, *J* = 16.2 Hz, 1H, Alk-H), 7.61-7.55 (m, 1H, Ar-H), 7.21-7.13 (m, 1H, Ar-H), 6.72 (d, *J* = 8.7 Hz, 1H, Ar-H), 6.61 (d, *J* = 15.9 Hz, 1H, Alk-H), 5.24 (t, *J* = 9.3 Hz, 1H, Sac-H), 5.09 (t, *J* = 9.6 Hz, 1H, Sac-H), 4.99 (t, *J* = 9.6 Hz, 1H, Sac-H), 4.25 (dd, *J* = 4.8 Hz, *J* = 12.5 Hz, 1H, Sac-H), 4.17-4.10 (m, 1H, Sac-H), 4.06 (dd, *J* = 2.1 Hz, *J* = 12.5 Hz, 1H, Sac-H), 3.76-3.71 (m, 1H, Sac-H), 3.06 (dd, *J* = 8.4 Hz, *J* = 16.2 Hz, 1H, -CH<sub>2</sub>), 2.74 (dd, *J* = 3.3 Hz, *J* = 16.2 Hz, 1H, -CH<sub>2</sub>), 2.05-2.02 (m, 12H, -COCH<sub>3</sub>); <sup>13</sup>C NMR (75 MHz, CDCl<sub>3</sub>):  $\delta$  195.8, 170.7, 170.3, 170.0, 169.5, 139.2, 133.7, 130.7, 130.6, 129.1, 125.1, 75.8, 74.2, 74.1, 71.7, 68.4, 62.0, 42.6, 20.7 (2C), 20.6 (2C); Elemental analysis Anal. Calc. for C<sub>24</sub>H<sub>27</sub>NO<sub>12</sub>: C, 55.28; H, 5.22; N, 2.69%. Found: C, 55.32; H, 5.25; N, 2.73.

### **2.2z Synthesis, physicochemical and spectral data of (*E*)-1-(2,3,4,6-tetra-*O*-hydroxy- $\beta$ -D-glucopyranosyl)-4-(2-hydroxyphenyl)-but-3-en-2-one (8):**

Compound, **8** was obtained as a wine red liquid by the deacetylation reaction of compound, **34** (0.32 g, 1 mmol) using sodiummethoxide.

Yield: 0.20 g (62%);  $^1\text{H}$  NMR (300 MHz,  $\text{CDCl}_3$  +  $\text{DMSO-d}_6$ ):  $\delta$  8.05 (d,  $J = 16.2$  Hz, 1H, Alk-H), 7.63 (d,  $J = 7.5$  Hz, 1H, Ar-H), 7.35 (t,  $J = 7.7$  Hz, 1H, Ar-H), 7.10-6.95 (m, 3H, Alk-H, Ar-H), 3.95-3.77 (m, 4H, Sac-H), 3.30-3.23 (m, 4H, Sac-H,  $-\text{CH}_2$ ), 3.02 (dd,  $J = 9.0$  Hz,  $J = 15.9$  Hz, 1H,  $-\text{CH}_2$ );  $^{13}\text{C}$  NMR (75 MHz,  $\text{CDCl}_3$  +  $\text{DMSO-d}_6$ ):  $\delta$  203.7, 162.1, 143.7, 136.4, 133.2, 131.1, 126.3, 124.3, 121.4, 84.7, 83.3, 80.9, 78.6, 75.5, 66.7, 47.9; Elemental analysis Anal. Calc. for  $\text{C}_{16}\text{H}_{20}\text{O}_7$ : C, 59.25; H, 6.22%. Found: C, 59.30; H, 6.28.

### **2.2z' Synthesis, physicochemical and spectral data of 2,3,4,6-tetra-*O*-acetyl- $\beta$ -D-glucopyranosyl)-4'-(*R*)-hydroxy-(2'-nitrophenyl)-butan-2-one (30):**

Aldol product, **30** was obtained as a by-product in the aldol condensation of  $\beta$ -C-glycosidic ketone, **3** (0.39 g, 1 mmol) with 2-nitro-benzaldehyde, (0.18 g, 1.2 mmol).

Mp: 142-143 °C; Yield: 0.19 g (35%);  $^1\text{H}$  NMR (300 MHz,  $\text{CDCl}_3$ ):  $\delta$  7.98 (d,  $J = 8.1$  Hz, 1H, Ar-H), 7.89 (d,  $J = 7.5$  Hz, 1H, Ar-H), 7.68 (t,  $J = 7.4$  Hz, 1H, Ar-H), 7.45 (t,  $J = 7.2$  Hz, 1H, Ar-H), 5.72 (d,  $J = 9.3$  Hz, 1H, Sac-H), 5.22 (t,  $J = 9.3$  Hz, 1H, Sac-H), 5.05 (t,  $J = 9.8$  Hz, 1H, Sac-H), 4.92 (t,  $J = 9.8$  Hz, 1H, Sac-H), 4.18-4.15 (m, 1H, Sac-H), 4.07-4.00 (m, 1H, Sac-H), 3.74-3.69 (m, 1H, Sac-H), 3.51 (s, 1H, Sac-H), 3.16-3.10 (m, 1H, Sac-H), 2.86 (dd,  $J = 8.7$  Hz,  $J = 15.9$  Hz, 1H, Sac-H), 2.72 (dd,  $J = 9.6$  Hz,  $J = 17.1$  Hz, 1H, Sac-H), 2.54 (dd,  $J = 2.7$  Hz,  $J = 16.2$  Hz, 1H, Sac-H), 2.06 (s, 6H,  $-\text{COCH}_3$ ), 2.03 (s, 3H,  $-\text{COCH}_3$ ), 2.01 (s, 3H,  $-\text{COCH}_3$ );  $^{13}\text{C}$  NMR (75 MHz,  $\text{CDCl}_3$ ):  $\delta$  206.3, 170.7, 170.2, 169.9, 169.5, 147.1, 138.9, 133.8, 128.3, 128.2, 124.4, 75.8, 74.0, 73.9, 71.5, 68.4, 65.1, 62.0, 52.1, 44.8, 20.7, 20.6; Elemental analysis Anal. Calc. for  $\text{C}_{24}\text{H}_{29}\text{NO}_{13}$ : C, 55.43; H, 5.42; N, 2.60%. Found: C, 55.47; H, 5.45; N, 2.63.

### **2.2z'' Synthesis, physicochemical and spectral data of 4,6-*O*-butylidene- $\beta$ -D-glucopyranosyl)-4'-(*R*)-hydroxy-(4''-carboxyphenyl)-butan-2-one 30':**

Aldol product, **30'** that was obtained as a by-product in the aldol condensation of  $\beta$ -C-glycosidic ketone, **2** (0.27 g, 1 mmol) with 4-formyl-benzoic acid, (0.18 g, 1.2 mmol).

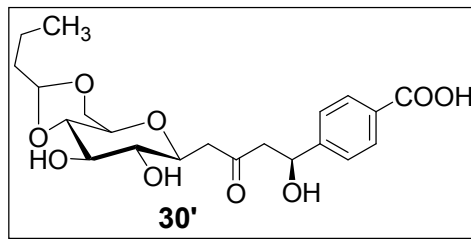

Yield: 0.13 g (31%);  $^1\text{H NMR}$  (300 MHz,  $\text{CDCl}_3$ ):  $\delta$  7.89 (d,  $J = 7.5$  Hz, 2H, Ar-H), 7.50 (bs, 2H, Ar-H), 4.51 (bs, 1H, Sac-H), 4.41-4.39 (m, 2H, Sac-H), 3.39-3.22 (m, 5H, Sac-H), 3.14-3.07 (m, 3H, -CH, - $\text{CH}_2$ ), 2.86-2.81 (m, 1H, - $\text{CH}_2$ ), 2.54-2.46 (m, 1H, - $\text{CH}_2$ ), 1.57-1.56 (m, 2H, - $\text{CH}_2$ ), 1.44-1.40 (m, 2H, - $\text{CH}_2$ ), 0.91 (t,  $J = 6.9$  Hz, 3H, - $\text{CH}_3$ );  $^{13}\text{C NMR}$  (75 MHz,  $\text{CDCl}_3$ ):  $\delta$  206.5, 206.2, 167.9, 143.6, 129.2, 128.3, 101.3, 80.5, 76.8, 73.9, 70.3, 67.4, 60.6, 45.7, 44.7, 35.9, 23.8, 17.1, 13.9; Elemental analysis Anal. Calc. for  $\text{C}_{21}\text{H}_{28}\text{O}_9$ : C, 59.43; H, 6.65%, Found: C, 59.47; H, 6.68.

## 2.2 General procedure for synthesis of sugar ketone derivatives (**23-29**):

Sugar chalcone (1 mmol) in ethanol (50 ml) was added to water solution containing  $\text{NH}_4\text{Cl}$  (20 mmol) at room temperature and stirred vigorously with Zn powder (3 mmol) added in three equal portions at intervals of 15 minutes. Stirring was continued for 15 minutes by warming the reaction mixture. The completion of the reaction was monitored through TLC and the reaction mixture was filtered using celite bed to remove the unreacted Zn. The filtrate was then evaporated under reduced pressure and extracted using EtOAc-water mixture. The ethylacetate layer was dried over anhyd.  $\text{Na}_2\text{SO}_4$  and concentrated to dryness. The product thus obtained was further purified by column chromatography.

### 2.2a Synthesis, physicochemical and spectral data of 1-(4,6-*O*-butylidene- $\beta$ -D-glucopyranosyl)-4-(4-bromophenyl)-butan-2-one (**23**):

Compound, **23** was obtained as a colourless solid by the reduction of sugar-chalcone, **5** (0.44 g, 1 mmol) using Zn (0.19 g, 3 mmol) and  $\text{NH}_4\text{Cl}$  (1.06 g, 20 mmol).

Mp: 126-128  $^\circ\text{C}$ ; Yield: 0.37 g (84%);  $^1\text{H NMR}$  (300 MHz,  $\text{CDCl}_3$ ):  $\delta$  7.39 (d,  $J = 8.4$  Hz, 2H, Ar-H), 7.05 (d,  $J = 8.4$  Hz, 2H, Ar-H), 4.52 (t,  $J = 5.1$  Hz, 1H, Ace-H), 4.09 (dd,  $J = 4.2$  Hz,  $J = 9.6$  Hz, 1H, Sac-H), 3.86-3.79 (m, 1H, Sac-H), 3.66 (t,  $J = 8.9$  Hz, 1H, Sac-H), 3.41-3.28 (m, 3H, Sac-H), 3.17 (t,  $J = 9.0$  Hz, 1H, Sac-H), 2.87-2.75 (m, 5H, -



CH<sub>2</sub>), 2.62 (dd,  $J = 7.8$  Hz,  $J = 15.9$  Hz, 1H, -CH<sub>2</sub>), 1.64-1.59 (m, 2H, -CH<sub>2</sub>), 1.42 (q,  $J = 7.8$  Hz, 2H, -CH<sub>2</sub>), 0.92 (t,  $J = 7.4$  Hz, 3H, -CH<sub>3</sub>); <sup>13</sup>C NMR (75 MHz, CDCl<sub>3</sub>):  $\delta$  207.5, 140.0, 131.5, 130.1, 119.9, 102.5, 80.4, 75.9, 75.3, 74.2, 70.6, 68.2, 45.3, 45.0, 36.2, 30.9, 17.5, 13.9; Elemental analysis Anal. Calc. for C<sub>20</sub>H<sub>27</sub>BrO<sub>6</sub>: C, 54.18; H, 6.14%. Found: C, 54.20; H, 6.17.

### **2.2b Synthesis, physicochemical and spectral data of 1-(4,6-*O*-butylidene- $\beta$ -D-glucopyranosyl)-4-(4-fluorophenyl)-butan-2-one (24):**

Compound, **24** was obtained as a colourless solid by the reduction of sugar-chalcone, **6** (0.38 g, 1 mmol) using Zn (0.20 g, 3 mmol) and NH<sub>4</sub>Cl (1.06 g, 20 mmol).

Mp: 116-118 °C; Yield: 0.30 g (79%); <sup>1</sup>H NMR (300 MHz, CDCl<sub>3</sub>):  $\delta$  7.12 (t,  $J = 6.9$  Hz, 2H, Ar-H), 6.95 (t,  $J = 8.6$  Hz, 2H, Ar-H), 4.51 (t,  $J = 5.0$  Hz, 1H, Sac-H), 4.09 (dd,  $J = 4.2$  Hz,  $J = 10.1$  Hz, 1H, Sac-H), 3.83 (t,  $J = 8.6$  Hz, 1H, Sac-H), 3.74-3.63 (m, 1H, Sac-H), 3.45-3.26 (m, 3H, -CH<sub>2</sub>, Sac-H), 3.19 (m, 1H, Sac-H), 2.89-2.82 (m, 4H, -CH<sub>2</sub>, Sac-H), 2.79-2.77 (m, 1H, -CH<sub>2</sub>), 2.62 (dd,  $J = 7.8$  Hz,  $J = 16.2$  Hz, 1H, -CH<sub>2</sub>), 1.64-1.59 (m, 2H, -CH<sub>2</sub>), 1.48-1.36 (m, 2H, -CH<sub>2</sub>), 0.92 (t,  $J = 7.2$  Hz, 3H, -CH<sub>3</sub>); <sup>13</sup>C NMR (75 MHz, CDCl<sub>3</sub>):  $\delta$  206.4, 135.4, 128.6, 126.3, 113.9, 101.3, 79.3, 74.7, 74.2, 73.1, 69.4, 67.1, 44.3, 44.2, 35.1, 27.4, 16.3, 12.8; Elemental analysis Anal. Calc. for C<sub>20</sub>H<sub>27</sub>FO<sub>6</sub>: C, 62.81; H, 7.12%. Found: C, 62.83; H, 7.14.

### **2.2c Synthesis, physicochemical and spectral data of 1-(4,6-*O*-butylidene- $\beta$ -D-glucopyranosyl)-4-(4-allyloxyphenyl)-butan-2-one (25):**

Compound, **25** was obtained as a liquid by the reduction of sugar-chalcone, **7** (0.42 g, 1 mmol) using Zn (0.20 g, 3 mmol) and NH<sub>4</sub>Cl (1.07 g, 20 mmol).

Yield: 0.30 g (71%); <sup>1</sup>H NMR (300 MHz, CDCl<sub>3</sub>):  $\delta$  7.09 (d,  $J = 8.1$  Hz, 2H, Ar-H), 6.85 (d,  $J = 6.9$  Hz, 2H, Ar-H), 6.11-6.04 (m, 1H, Alk-H), 5.42 (d,  $J = 17.4$  Hz, 1H, Alk-H), 5.30 (d,  $J = 9.3$  Hz, 1H, Alk-H), 4.53 (bs, 3H, -OCH<sub>2</sub>, Ace-H), 4.12 (t,  $J = 4.8$  Hz, 1H, Sac-H), 3.84 (t,  $J = 10.5$  Hz, 1H, Sac-H), 3.65 (t,  $J = 9.1$  Hz, 1H, Sac-H), 3.44-3.20 (m, 5H, Sac-H), 2.97-2.79 (m, 4H, -CH<sub>2</sub>), 2.64 (dd,  $J = 7.2$  Hz,  $J = 15.6$  Hz, 1H, -CH<sub>2</sub>), 1.65-1.60 (m, 2H, -CH<sub>2</sub>), 1.45-1.42 (m, 2H, -CH<sub>2</sub>), 0.93 (t,  $J = 7.4$  Hz, 3H, -CH<sub>3</sub>); <sup>13</sup>C NMR (75 MHz, CDCl<sub>3</sub>):  $\delta$  208.4, 133.4, 129.2, 117.6, 114.8, 102.5, 80.5, 76.1, 75.2, 74.2, 70.6,

68.9, 45.6, 45.4, 36.2, 29.7, 28.5, 17.5, 13.9; Elemental analysis Anal. Calc. for  $C_{23}H_{32}O_7$ : C, 65.70; H, 7.67%. Found: C, 65.74; H, 7.71.

**2.2d Synthesis, physicochemical and spectral data of 1-(4,6-*O*-butylidene- $\beta$ -D-glucopyranosyl)-4-(5-chloro-2-hydroxyphenyl)-butan-2-one (26):**

Compound, **26** was obtained as a colourless solid by the reduction of sugar-chalcone, **10** (0.42 g, 1 mmol) using Zn (0.20 g, 3 mmol) and  $NH_4Cl$  (1.07 g, 20 mmol).

Yield: 0.24 g (59%);  $^1H$  NMR (300 MHz,  $CDCl_3$ ):  $\delta$  7.07 (s, 1H, Ar-H), 7.05-7.02 (m, 1H, Ar-H), 6.80 (d,  $J = 8.4$  Hz, 1H, Ar-H), 4.50 (t,  $J = 5.0$  Hz, 1H, Ace-H), 4.14 (m, 2H, Sac-H), 3.75 (t,  $J = 8.9$  Hz, 1H, Sac-H), 3.65 (t,  $J = 9.0$  Hz, 1H, Sac-H), 3.47-3.25 (m, 5H, - $CH_2$ , Sac-H), 2.90-2.76 (m, 3H, - $CH_2$ ), 2.64 (dd,  $J = 7.5$  Hz,  $J = 15.2$  Hz, 1H, - $CH_2$ ), 1.62-1.59 (m, 2H, - $CH_2$ ), 1.45-1.40 (m, 2H, - $CH_2$ ), 1.28 (t,  $J = 7.2$  Hz, 3H, - $CH_3$ );  $^{13}C$  NMR (75 MHz,  $CDCl_3$ ):  $\delta$  211.4, 130.0, 129.2, 127.7, 125.3, 123.8, 118.4, 102.6, 80.3, 75.0, 74.3, 70.5, 68.1, 45.0, 44.9, 36.2, 31.5, 23.4, 17.4, 13.9; Elemental analysis Anal. Calc. for  $C_{20}H_{27}ClO_7$ : C, 57.90; H, 6.56%. Found: C, 57.96; H, 6.61.

**2.2e Synthesis, physicochemical and spectral data of 1-(4,6-*O*-butylidene- $\beta$ -D-glucopyranosyl)-4-(2-hydroxyphenyl)-butan-2-one (27):**

Compound, **27** was obtained as a colourless liquid by the reduction of its corresponding sugar-chalcone (0.38 g, 1 mmol) using Zn (0.20 g, 3 mmol) and  $NH_4Cl$  (1.07 g, 20 mmol).

Yield: 0.24 g (63%);  $^1H$  NMR (300 MHz,  $CDCl_3$ ):  $\delta$  7.14-7.04 (m, 2H, Ar-H), 6.91-6.82 (m, 2H, Ar-H), 4.52 (t,  $J = 5.9$  Hz, 1H, Ace-H), 4.14 (d,  $J = 4.5$  Hz,  $J = 9.9$  Hz, 1H, Sac-H), 3.83-3.72 (m, 2H, Sac-H), 3.48-3.22 (m, 7H, Sac-H, - $CH_2$ ), 2.94-2.87 (m, 2H, - $CH_2$ ), 2.66 (dd,  $J = 7.8$  Hz,  $J = 16.4$  Hz, 1H, - $CH_2$ ), 1.65-1.61 (m, 2H, - $CH_2$ ), 1.47-1.43 (m, 2H, - $CH_2$ ), 0.93 (t,  $J = 6.7$  Hz, 3H, - $CH_3$ );  $^{13}C$  NMR (75 MHz,  $CDCl_3$ ):  $\delta$  208.0, 130.4, 129.2, 127.8, 127.2, 125.0, 117.1, 80.4, 76.1, 74.9, 74.2, 70.5, 68.2, 45.1, 44.9, 36.2, 31.8, 29.7, 17.5, 13.9; Elemental analysis Anal. Calc. for  $C_{20}H_{28}O_7$ : C, 63.14; H, 7.42%. Found: C, 63.18; H, 7.47.

**2.2f Synthesis, physicochemical and spectral data of 1-(4,6-*O*-butylidene- $\beta$ -D-glucopyranosyl)-4-(3-quinolinyl)-butan-2-one (28):**

Compound, **28** was obtained as a brown solid by the reduction of sugar-chalcone, **18** (0.41 g, 1 mmol) using Zn (0.19 g, 3 mmol) and NH<sub>4</sub>Cl (1.05 g, 20 mmol).

Mp: 121-123 °C; Yield: 0.32 g (76%); <sup>1</sup>H NMR (300 MHz, CDCl<sub>3</sub>): δ 7.99 (d, *J* = 8.4 Hz, 1H, Ar-H), 7.94 (d, *J* = 8.4 Hz, 1H, Ar-H), 7.71 (d, *J* = 8.4 Hz, 1H, Ar-H), 7.61 (t, *J* = 7.4 Hz, 1H, Ar-H), 7.42 (t, *J* = 7.7 Hz, 1H, Ar-H), 7.25 (d, *J* = 8.4 Hz, 1H, Ar-H), 4.43 (t, *J* = 5.0 Hz, 1H, Ace-H), 4.01 (dd, *J* = 4.2 Hz, *J* = 9.6 Hz, 1H, Sac-H), 3.83-3.76 (m, 1H, Sac-H), 3.61 (t, *J* = 10.1 Hz, 1H, Sac-H), 3.35-3.19 (m, 4H, Sac-H), 3.12 (t, *J* = 9.0 Hz, 2H, -CH<sub>2</sub>), 3.00 (q, *J* = 5.1 Hz, 2H, -CH<sub>2</sub>), 2.92 (dd, *J* = 4.5 Hz, *J* = 16.1 Hz, 1H, -CH<sub>2</sub>), 2.73 (dd, *J* = 6.9 Hz, *J* = 15.9 Hz, 1H, -CH<sub>2</sub>), 1.56-1.51 (m, 2H, -CH<sub>2</sub>), 1.34 (q, *J* = 7.8 Hz, 2H, -CH<sub>2</sub>), 0.84 (t, *J* = 7.4 Hz, 3H, -CH<sub>3</sub>); <sup>13</sup>C NMR (75 MHz, CDCl<sub>3</sub>): δ 208.1, 160.8, 136.4, 129.4, 128.6, 127.5, 125.9, 121.7, 102.4, 80.5, 76.0, 75.3, 74.4, 70.6, 68.3, 45.7, 42.2, 36.2, 32.3, 17.5, 13.9; Elemental analysis Anal. Calc. for C<sub>23</sub>H<sub>29</sub>NO<sub>6</sub>: C, 66.49; H, 7.04; N 3.37%. Found: C, 66.52; H, 7.07; N, 3.39.

### **2.2g Synthesis, physicochemical and spectral data of 1-(4,6-*O*-butylidene-β-D-glucopyranosyl)-4-(1-pyrene)-butan-2-one (29):**

Compound, **29** was obtained as a colourless solid by the reduction of its corresponding sugar-chalcone (0.49 g, 1 mmol) using Zn (0.20 g, 3 mmol) and NH<sub>4</sub>Cl (1.07 g, 20 mmol).

Mp: 188-190 °C; Yield: 0.40 g (82%); <sup>1</sup>H NMR (300 MHz, CDCl<sub>3</sub>): δ 8.23-7.97 (m, 8H, Ar-H), 7.87 (d, *J* = 7.8 Hz, 1H, Ar-H), 4.33 (t, *J* = 5.1 Hz, 1H, Ace-H), 4.03 (d, *J* = 5.4 Hz, 1H, Sac-H), 3.84-3.77 (m, 1H, Sac-H), 3.65-3.59 (m, 3H, Sac-H), 3.28-3.18 (m, 3H, Sac-H), 3.06-2.95 (m, 3H, -CH<sub>2</sub>, Sac-H), 2.87 (dd, *J* = 3.9 Hz, *J* = 15.8 Hz, 1H, -CH<sub>2</sub>), 2.77-2.60 (m, 3H, -CH<sub>2</sub>), 1.60-1.54 (m, 2H, -CH<sub>2</sub>), 1.38 (q, *J* = 7.8 Hz, 2H, -CH<sub>2</sub>), 0.91 (t, *J* = 7.2 Hz, 3H, -CH<sub>3</sub>); <sup>13</sup>C NMR (75 MHz, CDCl<sub>3</sub>): δ 208.0, 135.1, 131.4, 130.8, 130.1, 128.5, 127.6, 127.5, 127.2, 126.8, 125.9, 125.1, 125.0, 124.9, 122.9, 102.4, 80.3, 76.0, 75.2, 74.1, 70.5, 68.1, 45.5, 45.4, 36.2, 27.0, 17.4, 13.9; ESI-MS Calc. for C<sub>30</sub>H<sub>32</sub>O<sub>6</sub>, 488; *m/z* found, 511 [M+Na]<sup>+</sup>; Elemental analysis Anal. Calc. for C<sub>30</sub>H<sub>32</sub>O<sub>6</sub>: C, 73.75; H, 6.60%. Found: C, 73.78; H, 6.62.

### 2.3 General procedure for synthesis of dimers (37-41):

To a solution of  $\beta$ -C-glycosidic ketone, **1** or **3** (1 mmol) in dry DCM (5 ml) were added pyrrolidine (50% mol) and *O*-alkylated aldehyde. After stirring at room temperature for a given period of time, the reaction mixture was evaporated under reduced pressure and extracted using EtOAc-water mixture. The ethylacetate layer was dried over anhyd. Na<sub>2</sub>SO<sub>4</sub> and concentrated to dryness. Product thus obtained was further purified by column chromatography.

#### 2.3a Synthesis, physicochemical and spectral data of (1*E*,4*E*)-1,5-bis(4-allyloxy)phenyl)penta-1,4-dien-3-one (**37**):

Compound, **37** was obtained by the reaction of  $\beta$ -C-glycoside, **4** (0.27 g, 1 mmol) with 4-allyloxybenzaldehyde, (0.19 g, 1.2 mmol) as yellow fluffy solid. However, the formation of corresponding sugar-chalcone, **31** was also observed.

Mp: 120-122 °C; Yield: 0.05 g (14%); <sup>1</sup>H NMR (300 MHz, CDCl<sub>3</sub>):  $\delta$  7.71 (d, *J* = 15.9 Hz, 2H, Alk-H), 7.58 (d, *J* = 8.4 Hz, 4H, Ar-H), 7.00-6.95 (m, 6H, Alk-H, Ar-H), 6.15-6.02 (m, 2H, -C $\equiv$ CH), 5.45 (d, *J* = 17.1 Hz, 2H, Alk-H), 5.34 (d, *J* = 10.8 Hz, 1H, Alk-H), 4.61 (d, *J* = 5.1 Hz, 4H, -OCH<sub>2</sub>); <sup>13</sup>C NMR (75 MHz, CDCl<sub>3</sub>):  $\delta$  188.9, 160.6, 142.7, 132.8, 130.1, 127.8, 123.6, 118.1, 115.2, 77.2, 68.9; Elemental analysis Anal. Calc. for C<sub>23</sub>H<sub>22</sub>O<sub>3</sub>: C, 79.74; H, 6.40%. Found: C, 79.79; H, 6.46.

#### 2.3b Synthesis, physicochemical and spectral data of (1*E*,4*E*)-1,5-bis(2-(prop-2-ynyloxy)naphthalen-1-yl)penta-1,4-dien-3-one (**38**):

Compound, **38** was obtained by the reaction of  $\beta$ -C-glycoside, **2** (0.27 g, 1 mmol) with 2-(prop-2-ynyloxy)-1-naphthaldehyde (0.25 g, 1.2 mmol) as a dark yellow solid in addition to the formation of corresponding sugar-chalcone, **32**.

Mp: 134-136 °C; Yield: 0.09 g (20%); <sup>1</sup>H NMR (300 MHz, CDCl<sub>3</sub>):  $\delta$  8.43 (d, *J* = 16.2 Hz, 2H, Alk-H), 8.29 (d, *J* = 8.4 Hz, 2H, Ar-H), 7.90 (d, *J* = 9.3 Hz, 2H, Ar-H), 7.83 (d, *J* = 8.1 Hz, 2H, Ar-H), 7.56 (t, *J* = 7.1 Hz, 2H, Ar-H), 7.51-7.41 (m, 6H, Alk-H, Ar-H), 4.93 (d, *J* = 2.1 Hz, 4H, -OCH<sub>2</sub>), 2.55 (t, *J* = 2.3 Hz, 2H, -C $\equiv$ CH); <sup>13</sup>C NMR (75 MHz, CDCl<sub>3</sub>):  $\delta$  190.5, 154.6, 136.1, 132.9, 131.9, 131.3, 129.6, 128.6, 127.5, 124.5, 123.9, 119.0, 114.4, 78.5, 78.2, 57.1; ESI-MS Calc. for C<sub>31</sub>H<sub>22</sub>O<sub>3</sub>, 442.16; *m/z* found, 443.16

[M+H]<sup>+</sup>; Elemental analysis Anal. Calc. for C<sub>31</sub>H<sub>22</sub>O<sub>3</sub>: C, 84.14; H, 5.01%. Found: C, 84.20; H, 5.09.

**2.3c Synthesis, physicochemical and spectral data of (1E,4E)-1,5-bis(2-(prop-2-ynyloxy)benz-1-yl)penta-1,4-dien-3-one (39):**

Compound, **39** was obtained by the reaction of  $\beta$ -C-glycoside, **2** (0.27 g, 1 mmol) with 2-(prop-2-ynyloxy)-1-benzaldehyde (0.19 g, 1.2 mmol) as a yellow liquid in addition to the formation of corresponding sugar-chalcone, **33**.

Yield: 0.03 g (10%); <sup>1</sup>H NMR (300 MHz, CDCl<sub>3</sub>):  $\delta$  7.89 (d, *J* = 16.8 Hz, 2H, Alk-H), 7.58 (d, *J* = 7.5 Hz, 2H, Ar-H), 7.38 (t, *J* = 7.9 Hz, 2H, Ar-H), 7.14-7.01 (m, 4H, Ar-H), 6.75 (d, *J* = 16.5 Hz, 2H, Alk-H), 4.80 (d, *J* = 2.4 Hz, 4H, -OCH<sub>2</sub>), 2.55 (t, *J* = 2.4 Hz, 2H, -C $\equiv$ CH); <sup>13</sup>C NMR (75 MHz, CDCl<sub>3</sub>):  $\delta$  199.0, 156.2, 138.3, 131.6, 128.6, 128.3, 121.8, 112.9, 78.1, 76.0, 56.3, 27.2; Elemental analysis Anal. Calc. for C<sub>23</sub>H<sub>18</sub>O<sub>3</sub>: C, 80.68; H, 5.30%. Found: C, 80.73; H, 5.35.

**2.3d Synthesis, physicochemical and spectral data of (1E,4E)-1,5-bis(5-chloro-2-(prop-2-ynyloxy)benz-1-yl)penta-1,4-dien-3-one (40):**

Compound, **40** was obtained by the reaction of  $\beta$ -C-glycoside, **2** (0.27 g, 1 mmol) with 5-chloro-2-(prop-2-ynyloxy)-1-benzaldehyde (0.23 g, 1.2 mmol) as a yellow liquid in addition to the formation of corresponding sugar-chalcone, **34**.

Yield: 0.02 g (5%); <sup>1</sup>H NMR (300 MHz, CDCl<sub>3</sub>):  $\delta$  7.82 (s, 2H, Ar-H), 7.53-7.47 (m, 4H, Alk-H, Ar-H), 7.13-7.08 (m, 4H, Alk-H, Ar-H), 4.74 (d, *J* = 2.4 Hz, 4H, -OCH<sub>2</sub>), 2.55 (t, *J* = 2.3 Hz, 2H, -C $\equiv$ CH); Elemental analysis Anal. Calc. for C<sub>23</sub>H<sub>16</sub>Cl<sub>2</sub>O<sub>3</sub>: C, 67.17; H, 3.92%. Found: C, 67.21; H, 3.95.

**2.3e Synthesis, physicochemical and spectral data of (1E,4E)-1,5-bis(4-(prop-2-ynyloxy)benz-1-yl)penta-1,4-dien-3-one (41):**

Compound, **41** was obtained by the aldol condensation of  $\beta$ -C-glycoside, **2** (0.27 g, 1 mmol) with 4-(prop-2-ynyloxy)-1-benzaldehyde, (0.19 g, 1.2 mmol) as a yellow solid in addition to the formation of corresponding sugar-chalcone, **35**.

M.Pt: 94-96 °C; Yield: 0.04 g (12%); <sup>1</sup>H NMR (300 MHz, CDCl<sub>3</sub>):  $\delta$  7.70 (d, *J* = 15.9 Hz, 2H, Alk-H), 7.59 (d, *J* = 8.7 Hz, 4H, Ar-H), 7.02 (d, *J* = 9.0 Hz, 2H, Ar-H), 6.97

(d,  $J = 15.9$  Hz, 4H, Ar-H), 4.61 (d,  $J = 2.1$  Hz, 4H, -OCH<sub>2</sub>), 2.55 (bs, 2H, -C≡CH); <sup>13</sup>C NMR (75 MHz, CDCl<sub>3</sub>):  $\delta$  187.0, 157.6, 140.7, 128.2, 126.7, 122.1, 113.5, 76.2, 74.2, 54.1; Elemental analysis Anal. Calc. for C<sub>23</sub>H<sub>18</sub>O<sub>3</sub>: C, 80.68; H, 5.30%. Found: C, 80.74; H, 5.36.

### 2.3f Synthesis, physicochemical and spectral data of (*E*)-1-(2,3,4-tri-*O*-acetyl- $\beta$ -D-xylopyranosyl)-4-(4-allyloxyphenyl)-but-3-en-2-one (31):

Compound, **31** was obtained by the aldol condensation reaction of 2,3,4-tri-*O*-acetyl- $\beta$ -D-xylopyranosyl-propane-2-one, **4** (0.32 g, 1 mmol) with 4-allyloxybenzaldehyde (0.20 g, 1.2 mmol) as a yellow solid.

Mp: 116-118 °C; Yield: 0.38 g (83%); <sup>1</sup>H NMR (300 MHz, CDCl<sub>3</sub>):  $\delta$  7.55-7.50 (m, 3H, Ar-H, Alk-H), 6.94 (d,  $J = 8.7$  Hz, 2H, Ar-H), 6.64 (d,  $J = 16.2$  Hz, 1H, Alk-H), 6.09-6.02 (m, 1H, Alk-H), 5.43 (d,  $J = 17.1$  Hz, 1H, Alk-H), 5.33 (d,  $J = 10.5$  Hz, 1H, Alk-H), 5.23 (t,  $J = 9.3$  Hz, 1H, Sac-H), 5.04-4.91 (m, 2H, Sac-H), 4.59 (d,  $J = 5.1$  Hz, 2H, -CH<sub>2</sub>), 4.09-4.01 (m, 2H, Sac-H), 3.34 (t,  $J = 10.8$  Hz, 1H, Sac-H), 2.97 (dd,  $J = 8.7$  Hz,  $J = 15.9$  Hz, 1H, -CH<sub>2</sub>), 2.63 (dd,  $J = 2.7$  Hz,  $J = 8.0$  Hz, 1H, -CH<sub>2</sub>), 2.04 (s, 9H, -COCH<sub>3</sub>); <sup>13</sup>C NMR (75 MHz, CDCl<sub>3</sub>):  $\delta$  196.3, 170.2, 170.1, 169.9, 160.8, 143.6, 132.7, 130.2, 127.0, 124.2, 118.1, 115.2, 74.9, 73.8, 72.0, 69.3, 68.9, 66.8, 42.5, 20.7 (3C); Elemental analysis Anal. Calc. for C<sub>24</sub>H<sub>28</sub>O<sub>9</sub>: C, 62.60; H, 6.13%. Found: C, 62.64; H, 6.16.

### 2.3g Synthesis, physicochemical and spectral data of (*E*)-1-(4,6-*O*-butylidene- $\beta$ -D-glucopyranosyl)-4-(2-prop-2-ynyloxy-1-naphthyl)-but-3-en-2-one (32):

Compound, **32** was obtained by the aldol condensation of  $\beta$ -C-glycoside, **2** (0.27 g, 1 mmol) with 2-(prop-2-ynyloxy)-1-naphthaldehyde (0.25 g, 1.2 mmol) as a yellow solid.

Mp: 202-204 °C; Yield: 0.37 g (79%); <sup>1</sup>H NMR (300 MHz, CDCl<sub>3</sub>):  $\delta$  8.24 (d,  $J = 16.5$  Hz, 1H, Alk-H), 8.15 (d,  $J = 8.4$  Hz, 1H, Ar-H), 7.89 (d,  $J = 9.0$  Hz, 1H, Ar-H), 7.82 (d,  $J = 7.8$  Hz, 1H, Ar-H), 7.54 (t,  $J = 7.7$  Hz, 1H, Ar-H), 7.44-7.37 (m, 2H, Ar-H), 7.08 (d,  $J = 16.5$  Hz, 1H, Alk-H), 4.89 (d,  $J = 2.4$  Hz, 2H, -OCH<sub>2</sub>), 4.55 (t,  $J = 5.1$  Hz, 1H, Sac-H), 4.18 (dd,  $J = 3.9$  Hz,  $J = 9.6$  Hz, 1H, Sac-H), 4.02-3.96 (m, 1H, Sac-H), 3.76 (t,  $J = 8.7$  Hz, 1H, Sac-H), 3.50-3.35 (m, 3H, Sac-H), 3.31-3.19 (m, 2H, Sac-H, -CH<sub>2</sub>), 3.04 (dd,  $J = 7.2$  Hz,  $J = 16.2$  Hz, 1H, -CH<sub>2</sub>), 2.56 (t,  $J = 2.4$  Hz, 1H, -C≡CH), 1.65-1.61 (m, 2H, -

CH<sub>2</sub>), 1.43 (q,  $J = 7.8$  Hz, 2H, -CH<sub>2</sub>), 0.92 (t,  $J = 7.4$  Hz, 3H, -CH<sub>3</sub>); <sup>13</sup>C NMR (75 MHz, CDCl<sub>3</sub>):  $\delta$  198.9, 154.7, 136.9, 132.7, 132.0, 131.7, 129.5, 128.7, 127.6, 124.5, 123.5, 118.1, 114.2, 102.5, 80.5, 78.3, 77.2, 76.3, 75.4, 74.7, 70.7, 68.4, 57.0, 43.8, 36.3, 17.5, 13.9; ESI-MS Calc. for C<sub>27</sub>H<sub>30</sub>O<sub>7</sub>, 466.20;  $m/z$  found, 467.21 [M+H]<sup>+</sup>; Elemental analysis Anal. Calc. for C<sub>27</sub>H<sub>30</sub>O<sub>7</sub>: C, 69.51; H, 6.48%. Found: C, 69.56; H, 6.53.

### **2.3h Synthesis, physicochemical and spectral data of (*E*)-1-(4,6-*O*-butylidene- $\beta$ -D-glucopyranosyl)-4-(2-prop-2-ynyloxyphenyl)-but-3-en-2-one (33):**

Compound, **33** was obtained by the aldol condensation of  $\beta$ -C-glycoside, **2** (0.27 g, 1 mmol) with 2-(prop-2-ynyloxy)benzaldehyde (0.19 g, 1.2 mmol) as a colourless solid.

Mp: 107-108 °C; Yield: 0.29 g (69%); <sup>1</sup>H NMR (300 MHz, CDCl<sub>3</sub>):  $\delta$  7.95 (d,  $J = 16.5$  Hz, 1H, Alk-H), 7.57 (d,  $J = 7.5$  Hz, 1H, Ar-H), 7.39 (t,  $J = 8.0$  Hz, 1H, Ar-H), 7.07-7.00 (m, 2H, Ar-H), 6.82 (d,  $J = 16.5$  Hz, 1H, Alk-H), 4.79 (d,  $J = 2.4$  Hz, 2H, -OCH<sub>2</sub>), 4.53 (t,  $J = 5.1$  Hz, 1H, Sac-H), 4.14 (dd,  $J = 4.2$  Hz,  $J = 9.6$  Hz, 1H, Sac-H), 3.98-3.91 (m, 1H, Sac-H), 3.73 (t,  $J = 8.9$  Hz, 1H, Sac-H), 3.46-3.31 (m, 3H, Sac-H), 3.25 (t,  $J = 8.9$  Hz, 1H, Sac-H), 3.25 (t,  $J = 8.9$  Hz, 1H, Sac-H), 3.14 (dd,  $J = 4.2$  Hz,  $J = 16.4$  Hz, 1H, -CH<sub>2</sub>), 3.00 (dd,  $J = 7.2$  Hz,  $J = 16.1$  Hz, 1H, -CH<sub>2</sub>), 2.55 (t,  $J = 2.4$  Hz, 1H, -C $\equiv$ CH), 1.62-1.60 (m, 2H, -CH<sub>2</sub>), 1.42 (q,  $J = 7.8$  Hz, 2H, -CH<sub>2</sub>), 0.92 (t,  $J = 7.4$  Hz, 3H, -CH<sub>3</sub>); <sup>13</sup>C NMR (75 MHz, CDCl<sub>3</sub>):  $\delta$  198.7, 156.4, 138.8, 131.8, 128.7, 127.3, 124.0, 121.8, 112.8, 102.5, 80.5, 78.1, 76.2, 75.4, 74.6, 70.6, 68.3, 56.2, 43.2, 36.2, 17.5, 13.9; Elemental analysis Anal. Calc. for C<sub>23</sub>H<sub>28</sub>O<sub>7</sub>: C, 66.33; H, 6.78%. Found: C, 66.36; H, 6.81.

### **2.3i Synthesis, physicochemical and spectral data of (*E*)-1-(4,6-*O*-butylidene- $\beta$ -D-glucopyranosyl)-4-(5-chloro-2-prop-2-ynyloxyphenyl)-but-3-en-2-one (34):**

Compound, **34** was obtained by the aldol condensation of  $\beta$ -C-glycoside, **2** (0.27 g, 1 mmol) with 5-chloro-2-(prop-2-ynyloxy)benzaldehyde (0.23 g, 1.2 mmol) as a colourless solid.

Mp: 124-125 °C; Yield: 0.34 g (76%); <sup>1</sup>H NMR (300 MHz, CDCl<sub>3</sub>):  $\delta$  7.82 (d,  $J = 16.2$  Hz, 1H, Alk-H), 7.51 (s, 1H, Ar-H), 7.31 (dd,  $J = 2.4$  Hz,  $J = 8.9$  Hz, 1H, Ar-H), 6.98 (d,  $J = 9.0$  Hz, 1H, Ar-H), 6.77 (d,  $J = 16.5$  Hz, 1H, Alk-H), 4.76 (d,  $J = 2.1$  Hz, 2H, -OCH<sub>2</sub>), 4.53 (t,  $J = 5.0$  Hz, 1H, Sac-H), 4.15-4.10 (m, 1H, Sac-H), 3.97-3.90 (m, 1H,

Sac-H), 3.73 (t,  $J = 8.9$  Hz, 1H, Sac-H), 3.44-3.22 (m, 4H, Sac-H, -CH<sub>2</sub>), 3.14 (dd,  $J = 3.6$  Hz,  $J = 16.1$  Hz, 1H, -CH<sub>2</sub>), 2.58 (t,  $J = 2.4$  Hz, 1H, -C≡CH), 1.64-1.60 (m, 2H, -CH<sub>2</sub>), 1.43 (q,  $J = 7.2$  Hz, 2H, -CH<sub>2</sub>), 0.91 (t,  $J = 7.4$  Hz, 3H, -CH<sub>3</sub>); <sup>13</sup>C NMR (75 MHz, CDCl<sub>3</sub>):  $\delta$  198.3, 154.8, 137.0, 131.1, 128.1, 128.0, 127.0, 125.6, 114.3, 102.5, 80.5, 77.7, 76.2, 75.3, 74.5, 70.6, 68.3, 56.6, 43.4, 36.2, 17.5, 13.9; Elemental analysis Anal. Calc. for C<sub>23</sub>H<sub>27</sub>ClO<sub>7</sub>: C, 61.26; H, 6.04%. Found: C, 61.29; H, 6.08.

### 2.3j Synthesis, physicochemical and spectral data of (*E*)-1-(4,6-*O*-butylidene- $\beta$ -D-glucopyranosyl)-4-(4-prop-2-ynyloxyphenyl)-but-3-en-2-one (35):

Compound, **35** was obtained by the aldol condensation of  $\beta$ -C-glycoside, **2** (0.27 g, 1 mmol) with 4-(prop-2-ynyloxy)benzaldehyde (0.19 g, 1.2 mmol) as a colourless solid.

Mp: 178-180 °C; Yield: 0.26 g (62%); <sup>1</sup>H NMR (300 MHz, CDCl<sub>3</sub>):  $\delta$  8.44-8.39 (m, 3H, Ar-H, Alk-H), 7.88 (d,  $J = 8.7$  Hz, 2H, Ar-H), 7.56 (d,  $J = 16.2$  Hz, 2H, Alk-H), 5.63 (d,  $J = 2.4$  Hz, 2H, -OCH<sub>2</sub>), 5.43 (t,  $J = 5.0$  Hz, 1H, Sac-H), 5.35 (d,  $J = 3.6$  Hz, 1H, Sac-OH), 5.06 (s, 1H, Sac-OH), 4.99 (dd,  $J = 3.6$  Hz,  $J = 9.6$  Hz, 1H, Sac-H), 4.80 (t,  $J = 8.4$  Hz, 1H, Sac-H), 4.56 (t,  $J = 8.4$  Hz, 1H, Sac-H), 4.30 (t,  $J = 9.8$  Hz, 1H, Sac-H), 4.24-4.11 (m, 3H, Sac-H), 4.03 (dd,  $J = 2.4$  Hz,  $J = 14.4$  Hz, 1H, -CH<sub>2</sub>), 3.73 (dd,  $J = 8.7$  Hz,  $J = 15.9$  Hz, 1H, -CH<sub>2</sub>), 3.49 (t,  $J = 2.3$  Hz, 1H, -C≡CH), 2.55-2.49 (m, 2H, -CH<sub>2</sub>), 2.32 (q,  $J = 7.5$  Hz, 2H, -CH<sub>2</sub>), 1.80 (t,  $J = 7.4$  Hz, 3H, -CH<sub>3</sub>); <sup>13</sup>C NMR (75 MHz, CDCl<sub>3</sub>):  $\delta$  192.5, 154.2, 137.3, 124.7, 122.7, 119.5, 110.1, 97.1, 75.3, 72.7, 72.1, 71.3, 70.8, 69.9, 69.6, 65.3, 63.1, 50.6, 38.1, 31.0, 12.1, 8.6; Elemental analysis Anal. Calc. for C<sub>20</sub>H<sub>26</sub>O<sub>7</sub>: C, 63.48; H, 6.93%. Found: C, 66.53; H, 6.97.

### 2.3k Synthesis, physicochemical and spectral data of (*E*)-1-(4,6-*O*-butylidene- $\beta$ -D-glucopyranosyl)-4-(3-methoxy-4-prop-2-ynyloxyphenyl)-but-3-en-2-one (36):

Compound, **36** was obtained by the aldol condensation of  $\beta$ -C-glycoside, **2** (0.27 g, 1 mmol) with 3-methoxy-4-(prop-2-ynyloxy)benzaldehyde (0.23 g, 1.2 mmol) as a colourless solid.

Mp: 179-180 °C; Yield: 0.35 g (78%); <sup>1</sup>H NMR (300 MHz, CDCl<sub>3</sub>):  $\delta$  7.54 (d,  $J = 15.9$  Hz, 1H, Alk-H), 7.26 (s, 1H, Ar-H), 7.15-7.02 (m, 3H, Ar-H), 6.66 (dd,  $J = 15.9$  Hz, 1H, Alk-H), 4.82 (s, 2H, -OCH<sub>2</sub>), 4.54 (bs, 1H, Sac-H), 4.14 (t,  $J = 4.8$  Hz, 1H, Sac-H), 3.92 (s, 3H, -OCH<sub>3</sub>), 3.72 (t,  $J = 9.2$  Hz, 1H, Sac-H), 3.43 (t,  $J = 9.5$  Hz, 1H, Sac-H), 3.35-



3.24 (m, 4H, Sac-H), 3.10-2.96 (m, 2H, -CH<sub>2</sub>), 2.01 (bs, 1H, -C≡CH), 1.64-1.60 (m, 2H, -CH<sub>2</sub>), 1.46-1.41 (m, 2H, -CH<sub>2</sub>), 0.92 (t, *J* = 7.2 Hz, 3H, -CH<sub>3</sub>); <sup>13</sup>C NMR (75 MHz, CDCl<sub>3</sub>): δ 202.5, 154.5, 153.7, 147.5, 133.3, 129.8, 127.3, 118.6, 115.3, 107.0, 85.4, 81.3, 79.8, 79.4, 73.1, 61.4, 60.7, 48.1, 41.0, 22.1, 18.7; Elemental analysis Anal. Calc. for C<sub>24</sub>H<sub>30</sub>O<sub>8</sub>: C, 64.56; H, 6.77%. Found: C, 64.60; H, 6.79.

**<sup>1</sup>H NMR, <sup>13</sup>C NMR, DEPT-135, <sup>1</sup>H-<sup>1</sup>H [COSY] spectra, Mass spectra are given below:**

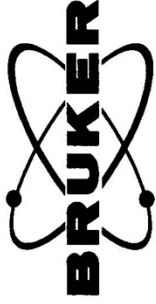

Current Data Parameters  
 NAME TMDH-154  
 EXPNO 1  
 PROCNO 1

F2 - Acquisition Parameters  
 Date\_ 20110727  
 Time\_ 19.05  
 INSTRUM spect  
 PROBD 5 mm DUL 13C-1  
 PULPROG zg30  
 TD 65536  
 SOLVENT CDCl3  
 NS 16  
 DS 2  
 SWH 6172.839 Hz  
 FIDRES 0.094190 Hz  
 AQ 5.3084660 sec  
 RG 143.7  
 DW 81.000 usec  
 DE 6.00 usec  
 TE 300.0 K  
 DL 1.00000000 sec  
 TDO 1

===== CHANNEL f1 =====  
 NUC1 1H  
 P1 13.15 usec  
 PL1 0.00 dB  
 SF01 300.1318534 MHz

F2 - Processing parameters  
 SI 32768  
 SF 300.1313064 MHz  
 WDW EM  
 SSB 0  
 LB 0.30 Hz  
 GB 0  
 PC 1.00

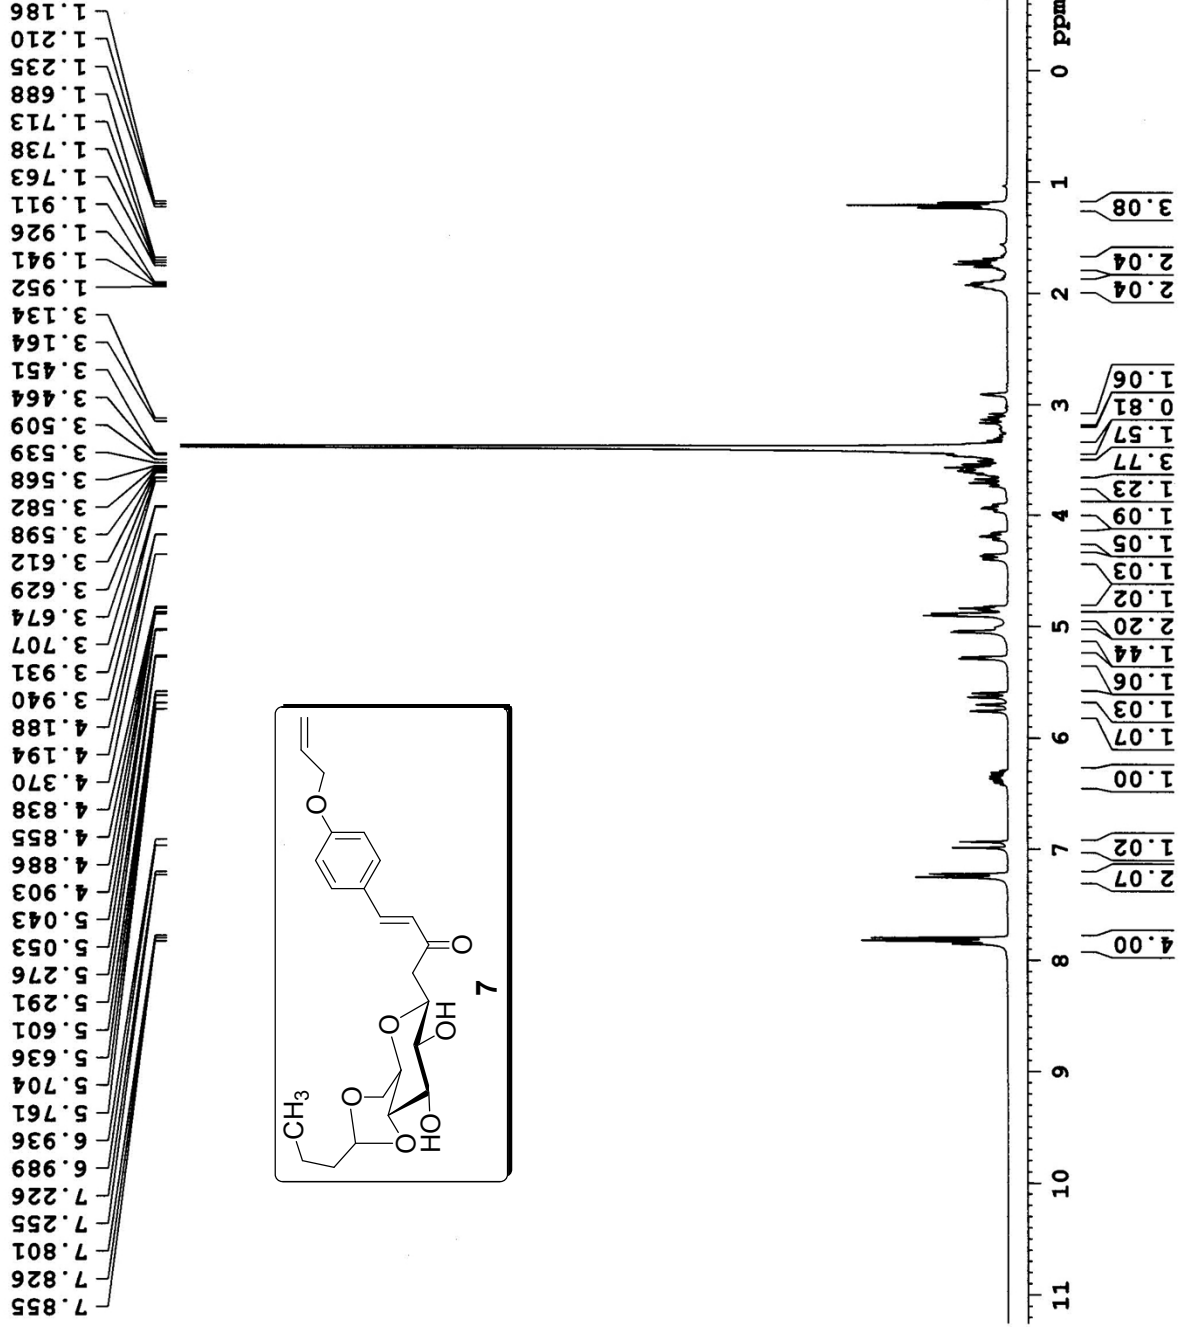

Figure 1 <sup>1</sup>H NMR spectrum (300 MHz, CDCl<sub>3</sub>) of compound, 7.

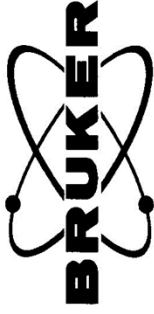

Current Data Parameters  
 NAME TMDH-154C  
 EXPNO 1  
 PROCNO 1

F2 - Acquisition Parameters  
 Date\_ 20110728  
 Time 9.58  
 INSTRUM spect  
 PROBHD 5 mm DUL 13C-1  
 PULPROG zgpg30  
 TD 65536  
 SOLVENT CDCl3  
 NS 502  
 DS 4  
 SWH 17985.611 Hz  
 FIDRES 0.274439 Hz  
 AQ 1.8219508 sec  
 RG 4096  
 DW 27.800 usec  
 DE 6.00 usec  
 TE 300.0 K  
 D1 2.00000000 sec  
 d11 0.03000000 sec  
 DELTA 1.89999998 sec  
 TD0 1

==== CHANNEL f1 =====  
 NUC1 13C  
 P1 9.30 usec  
 PL1 0.00 dB  
 SFO1 75.4752953 MHz

==== CHANNEL f2 =====  
 CPDPRG2 waltz16  
 NUC2 1H  
 PCPD2 80.00 usec  
 PL2 0.00 dB  
 PL12 15.68 dB  
 PL13 16.00 dB  
 SFO2 300.1312005 MHz

F2 - Processing parameters  
 SI 32768  
 SF 75.4677490 MHz  
 WDW EM  
 SSB 0  
 LB 1.00 Hz  
 GB 0  
 PC 1.40

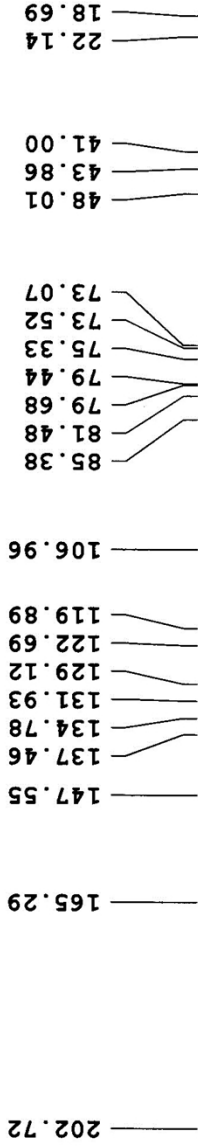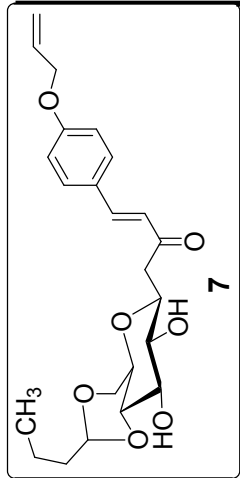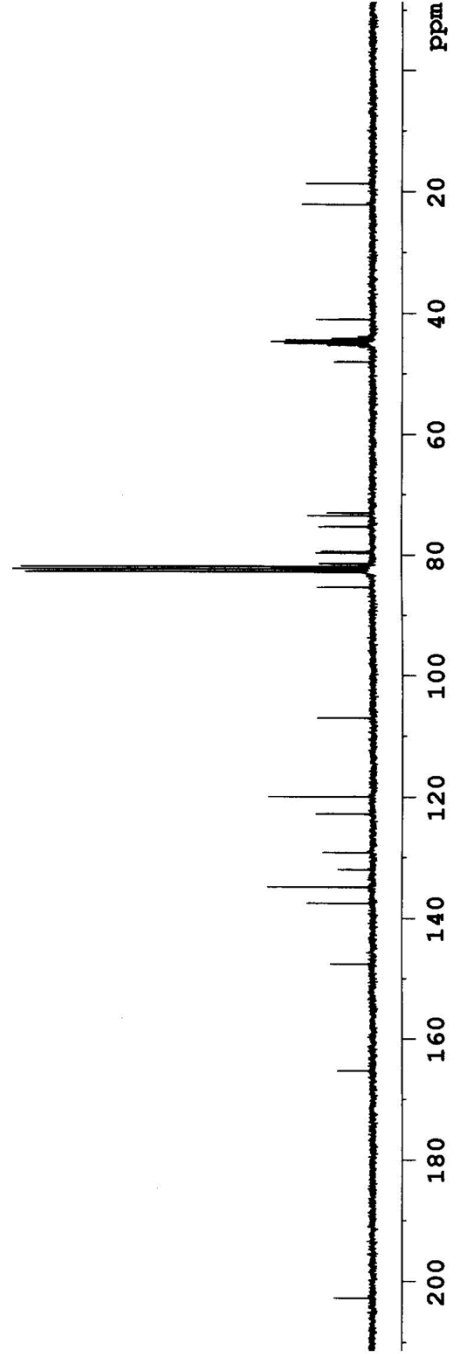

Figure 2 <sup>13</sup>C NMR spectrum (75 MHz, CDCl<sub>3</sub>) of compound, 7.

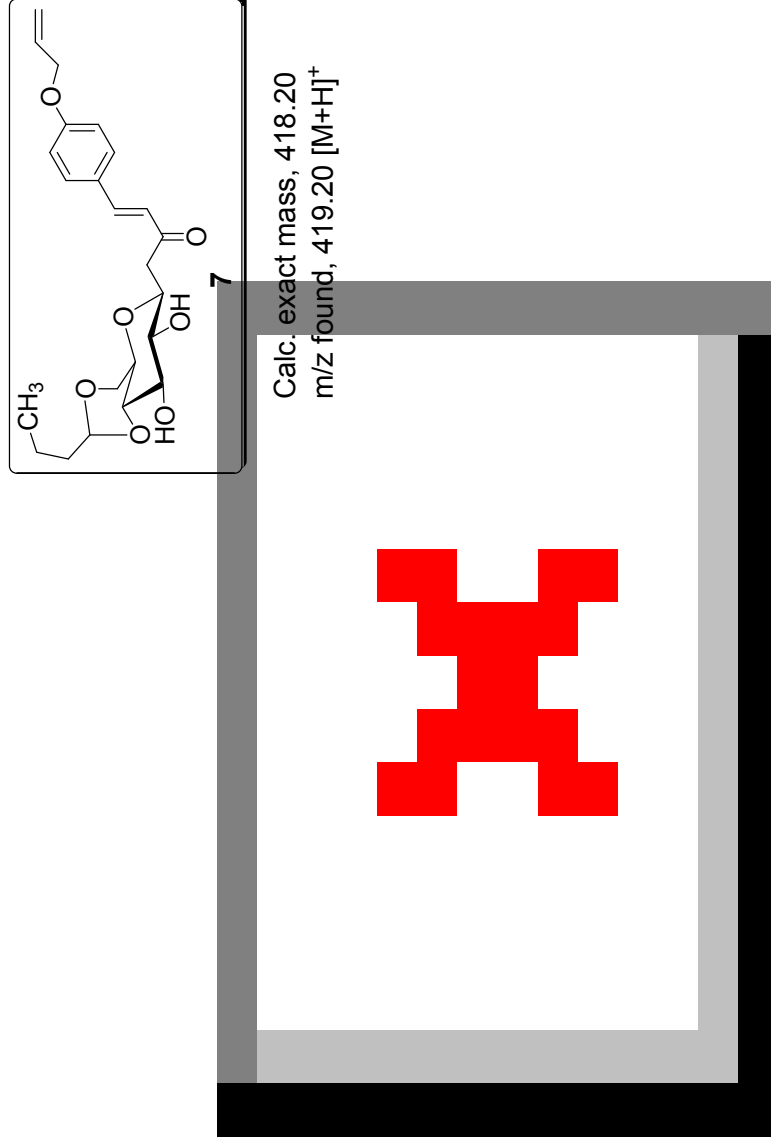

Figure 3 Mass spectrum of compound, 7.

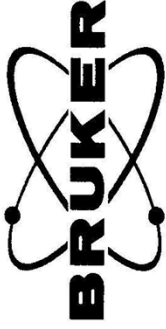

Current Data Parameters  
NAME TMDH-296  
EXPNO 1  
PROCNO 1

F2 - Acquisition Parameters  
Date\_ 20130105  
Time 19.18  
INSTRUM spect  
PROBHD 5 mm DUL 13C-1  
PULPROG zg30  
TD 65536  
SOLVENT CDCl3  
NS 39  
DS 2  
SWH 6172.839 Hz  
FIDRES 0.094190 Hz  
AQ 5.3084660 sec  
RG 322.5  
DW 81.000 usec  
DE 6.00 usec  
TE 300.0 K  
D1 1.00000000 sec  
TD0 1

==== CHANNEL f1 =====  
NUC1 1H  
P1 13.15 usec  
PL1 0.00 dB  
SF01 300.1318534 MHz

F2 - Processing parameters  
SI 32768  
SF 300.1314023 MHz  
WDW EM  
SSB 0  
LB 0.30 Hz  
GB 0  
PC 1.00

7.804  
7.564  
7.536  
7.521  
7.504  
7.475  
7.467  
6.816  
6.762  
4.536  
4.520  
4.503  
4.048  
4.016  
4.001  
3.844  
3.836  
3.544  
3.516  
3.406  
3.374  
3.341  
3.288  
3.273  
3.257  
3.249  
3.244  
3.218  
3.189  
3.158  
3.149  
3.141  
3.096  
3.088  
2.850  
2.820  
1.609  
1.595  
1.580  
1.566  
1.452  
1.428  
1.402  
1.377  
0.929  
0.904  
0.880

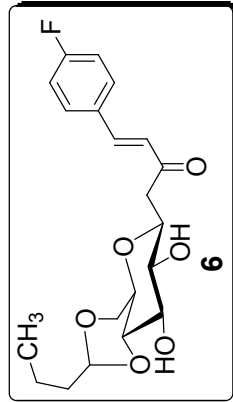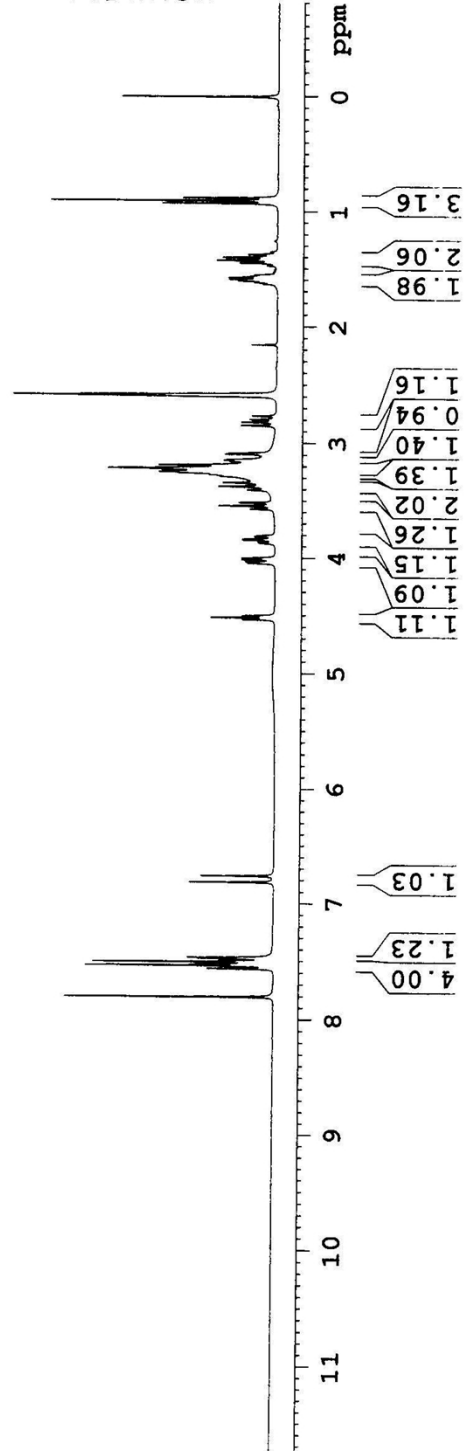

Figure 4 <sup>1</sup>H NMR spectrum (300 MHz, CDCl<sub>3</sub> + DMSO) of compound, 6.

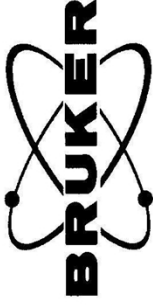

Current Data Parameters  
 NAME TMDH-296  
 EXPNO 2  
 PROCNO 1

F2 - Acquisition Parameters  
 Date\_ 20130106  
 Time\_ 7.55  
 INSTRUM spect  
 PROBHD 5 mm DUL 13C-1  
 PULPROG zgpg30  
 TD 65536  
 SOLVENT CDCl3  
 NS 4984  
 DS 4  
 SWH 18832.393 Hz  
 FIDRES 0.287360 Hz  
 AQ 1.7400308 sec  
 RG 4096  
 DW 26.550 usec  
 DE 6.00 usec  
 TE 300.0 K  
 DI 2.0000000 sec  
 d11 0.0300000 sec  
 DELTA 1.89999998 sec  
 TD0 1

==== CHANNEL f1 =====  
 NUC1 13C  
 P1 9.30 usec  
 PL1 0.00 dB  
 SFO1 75.4752953 MHz

==== CHANNEL f2 =====  
 CPDPRG2 waltz16  
 NUC2 1H  
 PCPD2 80.00 usec  
 PL2 0.00 dB  
 PL12 15.68 dB  
 PL13 16.00 dB  
 SFO2 300.1312005 MHz

F2 - Processing parameters  
 SI 32768  
 SF 75.4677490 MHz  
 WDW EM  
 SSB 0  
 LB 1.00 Hz  
 GB 0  
 PC 1.40

202.40  
 145.99  
 138.43  
 136.87  
 134.68  
 132.00  
 129.14  
 106.85  
 85.60  
 83.25  
 81.63  
 79.59  
 79.42  
 75.44  
 73.02  
 48.37  
 41.08  
 22.14  
 18.79

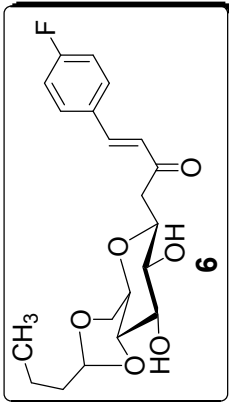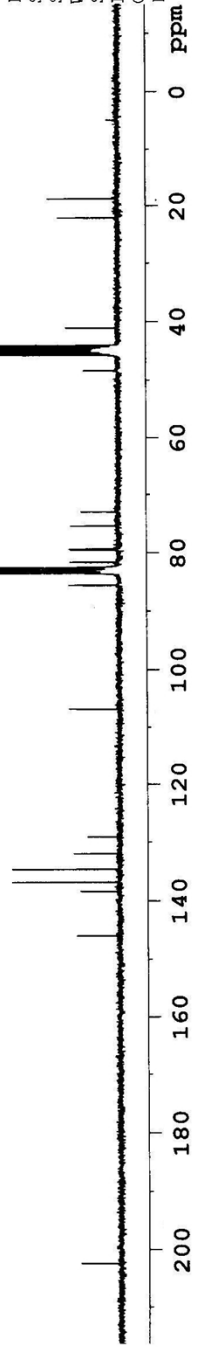

Figure 5 <sup>13</sup>C NMR spectrum (75 MHz, CDCl<sub>3</sub> + DMSO) of compound, 6.

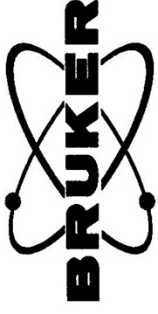

Current Data Parameters  
 NAME TMDH-289  
 EXPNO 1  
 PROCNO 1

F2 - Acquisition Parameters  
 Date\_ 20121227  
 Time\_ 20.43  
 INSTRUM spect  
 PROBHD 5 mm DUL 13C-1  
 PULPROG zg30  
 TD 65536  
 SOLVENT CDCl3  
 NS 16  
 DS 2  
 SWH 6172.839 Hz  
 FIDRES 0.094190 Hz  
 AQ 5.3084660 sec  
 RG 101.6  
 DW 81.000 usec  
 DE 6.00 usec  
 TE 300.0 K  
 D1 1.00000000 sec  
 TD0 1

==== CHANNEL f1 =====  
 NUC1 1H  
 P1 13.15 usec  
 PL1 0.00 dB  
 SFO1 300.1318534 MHz

F2 - Processing parameters  
 SI 32768  
 SF 300.1314034 MHz  
 EM  
 WDW 0  
 SSB 0  
 LB 0.30 Hz  
 GB 0  
 PC 1.00

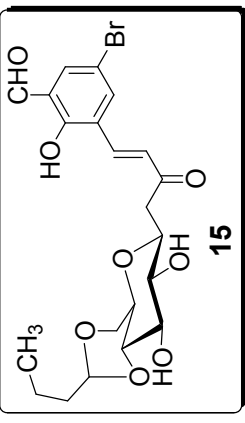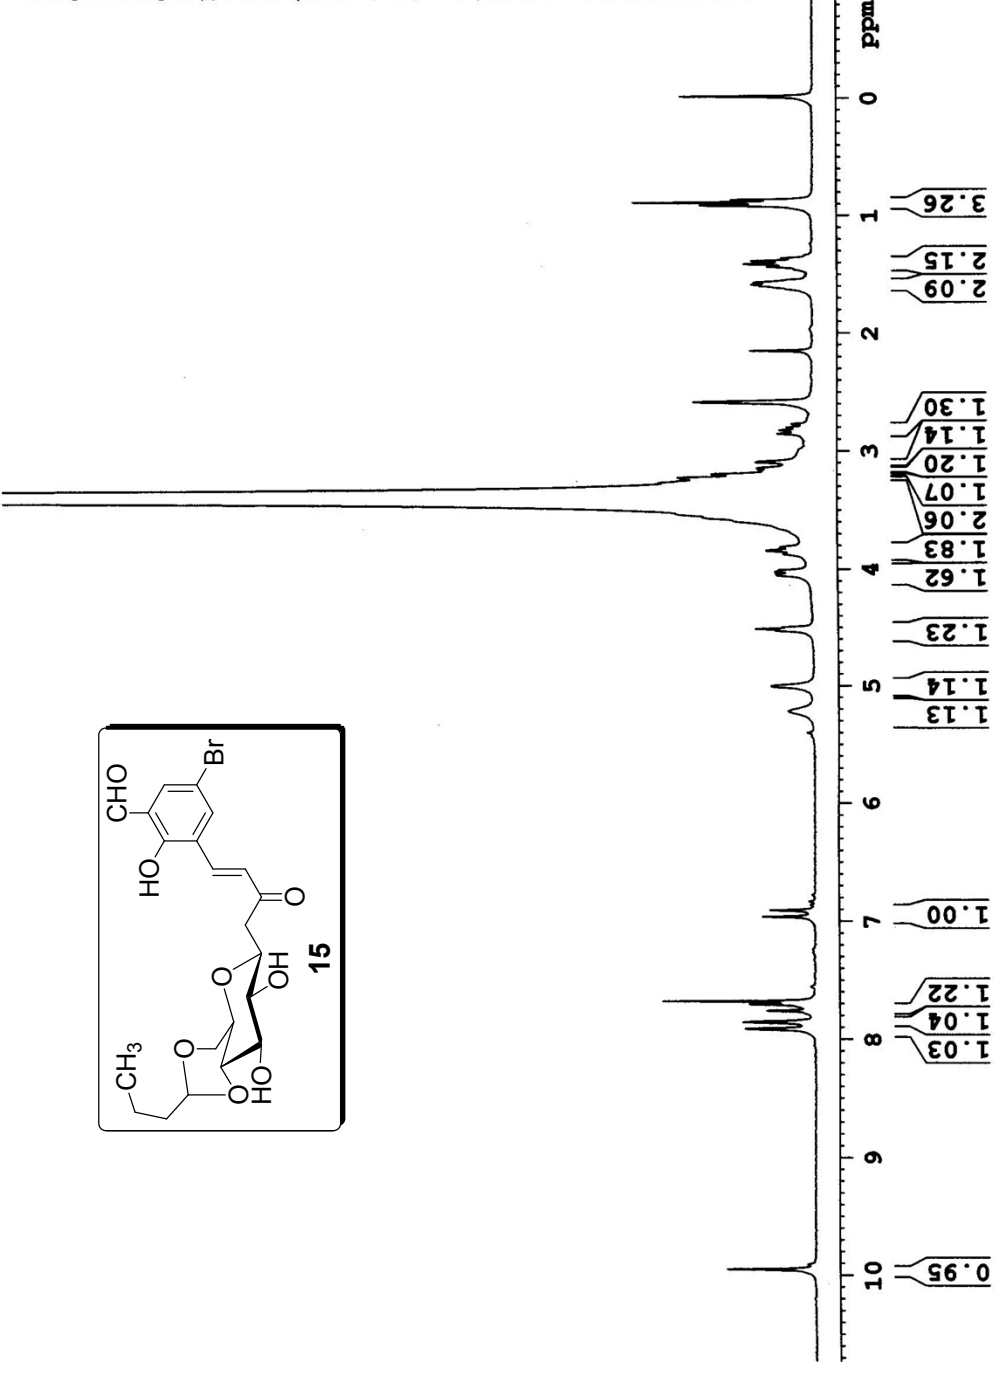

Figure 6 <sup>1</sup>H NMR spectrum (300 MHz, DMSO) of compound, 15.

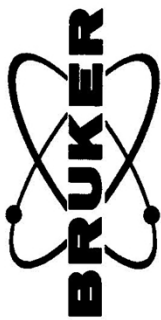

Current Data Parameters  
NAME AT-MRS5-13  
EXPNO 1  
PROCNO 1

F2 - Acquisition Parameters

Date\_ 20130805  
Time 16.59  
INSTRUM spect  
PROBHD 5 mm DUL 13C-1  
PULPROG zgpg30  
TD 65536  
SOLVENT DMSO  
NS 611  
DS 4  
SWH 17985.611 Hz  
FIDRES 0.274439 Hz  
AQ 1.8219508 sec  
RG 456.1  
DW 27.800 usec  
DE 6.00 usec  
TE 300.0 K  
D1 2.0000000 sec  
d11 0.0300000 sec  
DELTA 1.89999998 sec  
TDO 1

==== CHANNEL f1 =====  
NUC1 13C  
P1 9.30 usec  
PL1 0.00 dB  
SFO1 75.4752953 MHz

==== CHANNEL f2 =====  
CPDPRG2 waltz16  
NUC2 1H  
PCPD2 80.00 usec  
PL2 0.00 dB  
PL12 15.68 dB  
PL13 16.00 dB  
SFO2 300.1312005 MHz

F2 - Processing parameters  
SI 32768  
SF 75.4677867 MHz  
WDW EM  
SSB 0  
LB 1.00 Hz  
GB 0  
PC 1.40

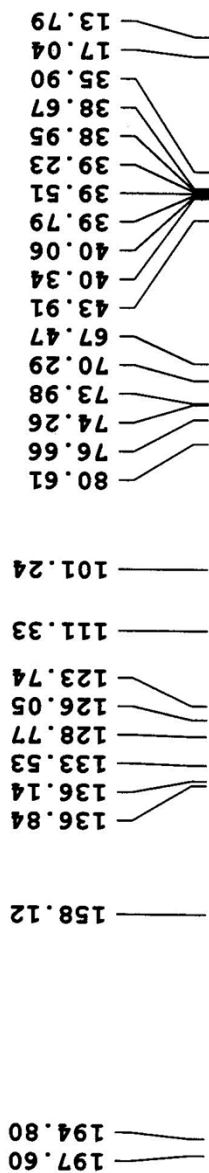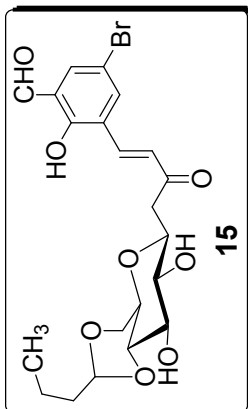

Figure 7 <sup>13</sup>C NMR spectrum (75 MHz, DMSO) of compound, 15.



Electrospray Ionization-MS

SKH4 17 (0.368) AM (Cam, 4, 100.00, Ar, 8500.0, 556.28, 0.30, LS 10); Sm (SG, 2x5.00); Sb (10, 1.00); Cm (17:21-53:64)

WATERS-Q-ToF Premier-HAB213

1: TOF MS ES+  
1.58e3

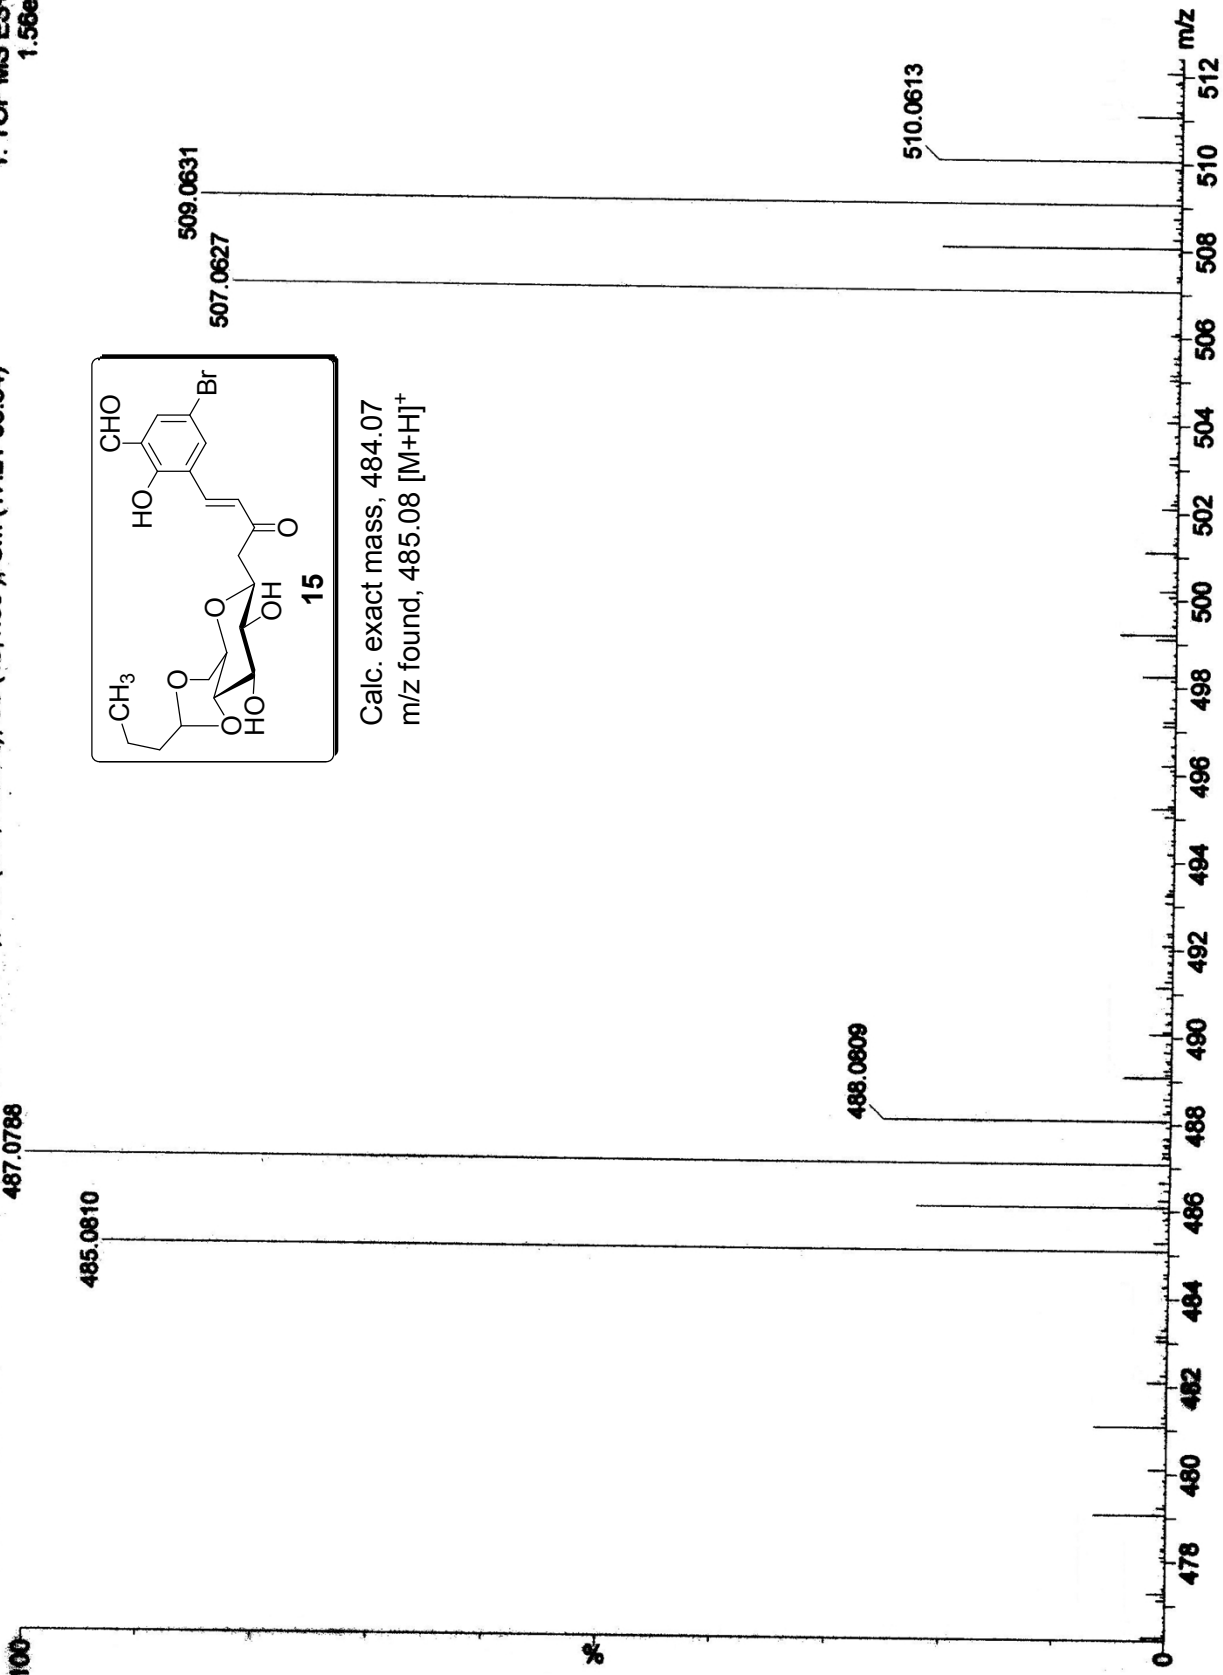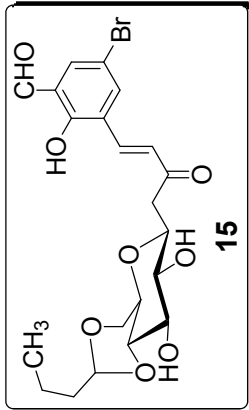

Calc. exact mass, 484.07  
m/z found, 485.08 [M+H]<sup>+</sup>

Figure 8 Mass spectrum of compound, 15.

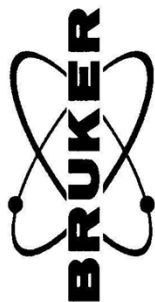

7.975  
7.948  
7.912  
7.886  
7.698  
7.673  
7.473  
7.447  
5.742  
5.711  
5.250  
5.219  
5.188  
5.082  
5.049  
5.017  
4.953  
4.920  
4.888  
4.212  
4.187  
4.171  
4.135  
4.129  
4.087  
4.077  
4.056  
4.046  
4.024  
4.014  
3.737  
3.728  
3.711  
3.704  
3.099  
3.094  
3.043  
3.037  
2.826  
2.797  
2.766  
2.740  
2.595  
2.585  
2.060  
2.056  
2.031  
2.007

Current Data Parameters  
 NAME TMDH-184-2D  
 EXPNO 3  
 PROCNO 1

F2 - Acquisition Parameters  
 Date\_ 20111031  
 Time 21.43  
 INSTRUM spect  
 PROBDH 5 mm DUL 13C-1  
 PULPROG zg30  
 TD 65536  
 SOLVENT CDCl3  
 NS 16  
 DS 2  
 SWH 6172.839 Hz  
 FIDRES 0.094190 Hz  
 AQ 5.3084660 sec  
 RG 143.7  
 DE 81.000 usec  
 TE 300.0 K  
 D1 1.00000000 sec  
 TD0 1

==== CHANNEL f1 =====  
 NUC1 1H  
 P1 13.15 usec  
 PL1 0.00 dB  
 SFO1 300.1318534 MHz  
 F2 - Processing parameters  
 SI 32768  
 SF 300.1299943 MHz  
 WDW EM  
 SSB 0  
 LB 0.30 Hz  
 GB 0  
 PC 1.00

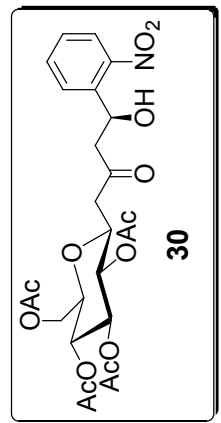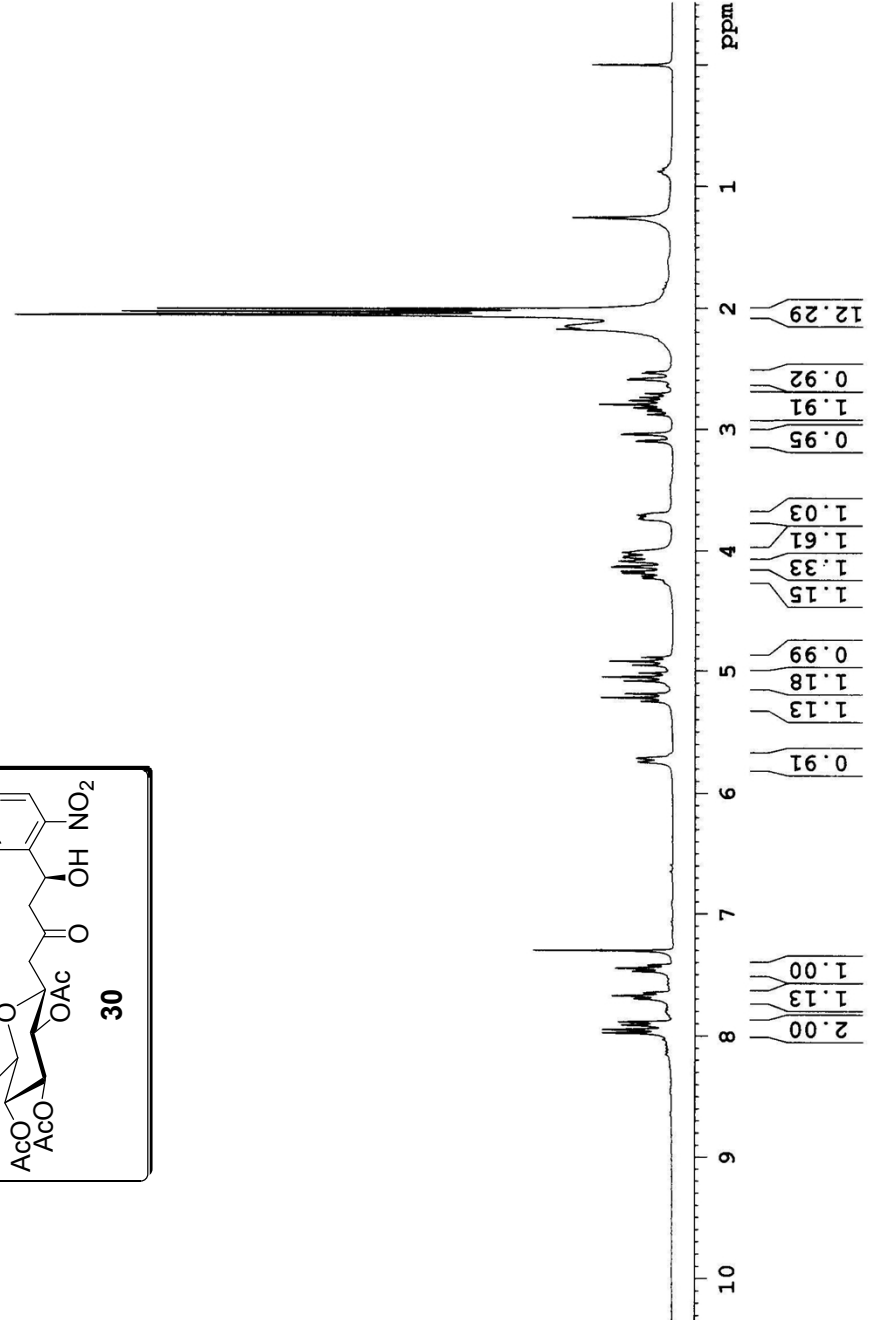

Figure 9 <sup>1</sup>H NMR spectrum (300 MHz, CDCl<sub>3</sub>) of compound, **30**.

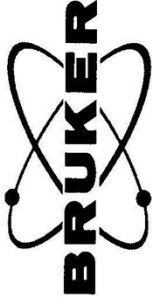

Current Data Parameters  
NAME TMDH-184-2D  
EXPNO 4  
PROCNO 1

F2 - Acquisition Parameters  
Date\_ 20111101  
Time 2.04  
INSTRUM spect  
PROBHD 5 mm DUL 13C-1  
PULPROG zgpg30  
TD 65536  
SOLVENT CDCl3  
NS 4000  
DS 4  
SWH 17985.611 Hz  
FIDRES 0.274439 Hz  
AQ 1.8219508 sec  
RG 5160.6  
DW 27.800 usec  
DE 6.00 usec  
TE 300.0 K  
D1 2.0000000 sec  
d11 0.0300000 sec  
DELTA 1.8999998 sec  
TDO 1

=====  
CHANNEL f1  
NUC1 13C  
P1 9.30 usec  
PL1 0.00 dB  
SF01 75.4752953 MHz

=====  
CHANNEL f2  
CPDPRG2 waltz16  
NUC2 1H  
PCPD2 80.00 usec  
PL2 0.00 dB  
PL12 15.68 dB  
PL13 16.00 dB  
SF02 300.1312005 MHz

F2 - Processing parameters  
SI 32768  
SF 75.4677490 MHz  
WDW EM  
SSB 0  
LB 1.00 Hz  
GB 0  
PC 1.40

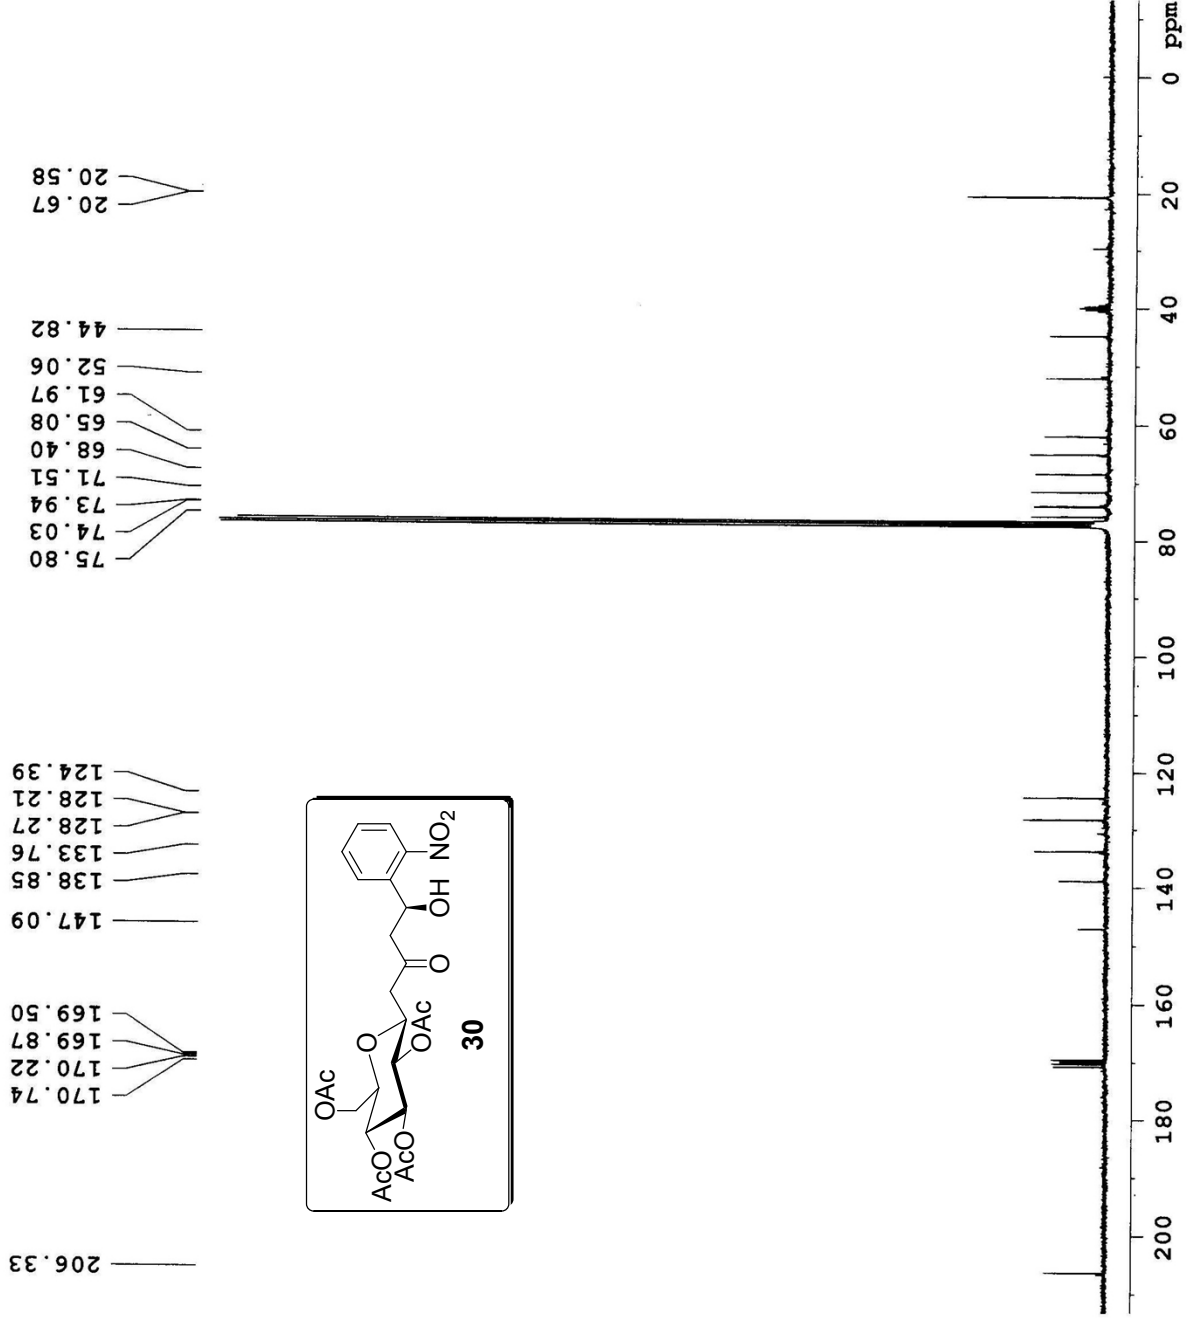

Figure 10 <sup>13</sup>C NMR spectrum (75 MHz, CDCl<sub>3</sub>) of compound, **30**.

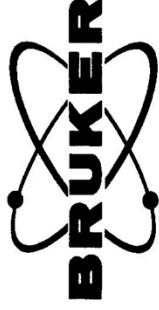

8.225  
8.194  
8.178  
8.161  
8.152  
8.125  
8.110  
8.094  
8.084  
8.021  
8.021  
7.993  
7.967  
7.882  
7.856  
7.259  
4.344  
4.327  
4.310  
4.041  
4.023  
3.654  
3.629  
3.604  
3.238  
3.230  
3.216  
3.036  
3.008  
2.983  
2.851  
2.839  
2.772  
2.760  
2.692  
2.680  
2.654  
1.597  
1.589  
1.573  
1.565  
1.558  
1.542  
1.418  
1.393  
1.367  
0.930  
0.906  
0.882

Current Data Parameters  
 NAME TMDH-TGM-2  
 EXPNO 1  
 PROCNO 1

F2 - Acquisition Parameters  
 Date\_ 20130524  
 Time 16.33  
 INSTRUM spect  
 PROBHD 5 mm DUL 13C-1  
 PULPROG zg30  
 TD 65536  
 SOLVENT CDCl3  
 NS 17  
 DS 2  
 SWH 6172.839 Hz  
 FIDRES 0.094190 Hz  
 AQ 5.3084660 sec  
 RG 287.4  
 DW 81.000 usec  
 DE 6.00 usec  
 TE 300.0 K  
 D1 1.00000000 sec  
 TD0 1

==== CHANNEL f1 =====  
 NUC1 1H  
 P1 13.15 usec  
 PL1 0.00 dB  
 SF01 300.1318534 MHz

F2 - Processing parameters  
 SI 32768  
 SF 300.1300070 MHz  
 WDW EM  
 SSB 0  
 LB 0.30 Hz  
 GB 0  
 PC 1.00

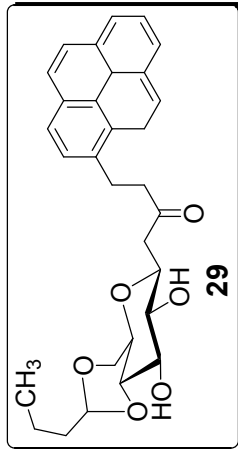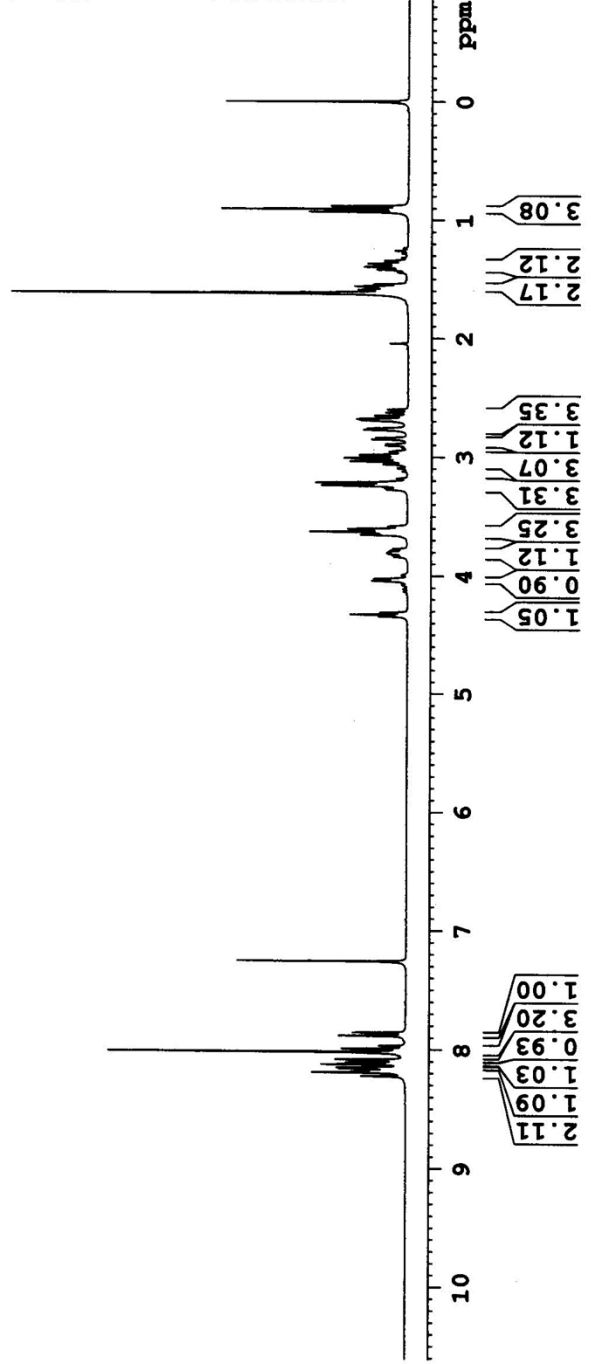

Figure 11 <sup>1</sup>H NMR spectrum (300 MHz, CDCl<sub>3</sub>) of compound, 29.

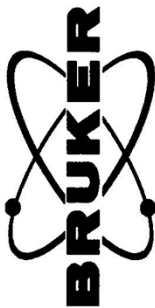

Current Data Parameters  
NAME TMDH-TGM-2  
EXPNO 2  
PROCNO 1

F2 - Acquisition Parameters  
Date\_ 20130525  
Time 22.58  
INSTRUM spect  
PROBHD 5 mm DUL 13C-1  
PULPROG zgpg30  
TD 65536  
SOLVENT CDCl3  
NS 1024  
DS 4  
SWH 17985.611 Hz  
FIDRES 0.274439 Hz  
AQ 1.8219508 sec  
RG 1448.2  
DW 27.800 usec  
DE 6.00 usec  
TE 300.0 K  
d1 2.00000000 sec  
d11 0.03000000 sec  
DELTA 1.89999998 sec  
TDO 1

==== CHANNEL f1 =====  
NUC1 13C  
P1 9.30 usec  
PL1 0.00 dB  
SFO1 75.4752953 MHz

==== CHANNEL f2 =====  
CPDPRG2 waltz16  
NUC2 1H  
PCPD2 80.00 usec  
PL2 0.00 dB  
PLI2 15.68 dB  
PLI3 16.00 dB  
SFO2 300.1312005 MHz

F2 - Processing parameters  
SI 32768  
SF 75.4677490 MHz  
WDW EM  
SSB 0  
LB 1.00 Hz  
GB 0  
PC 1.40

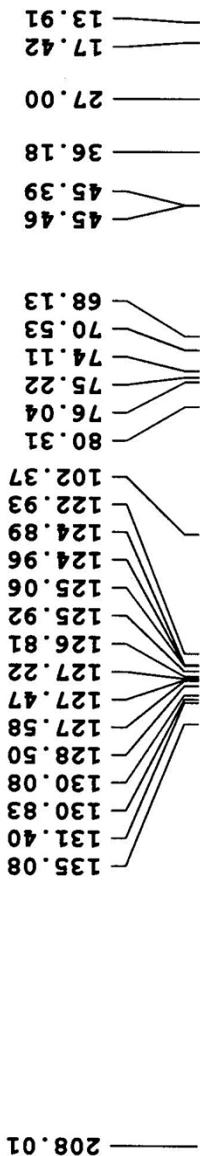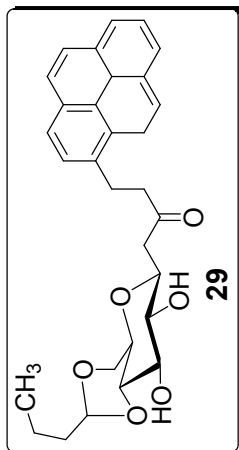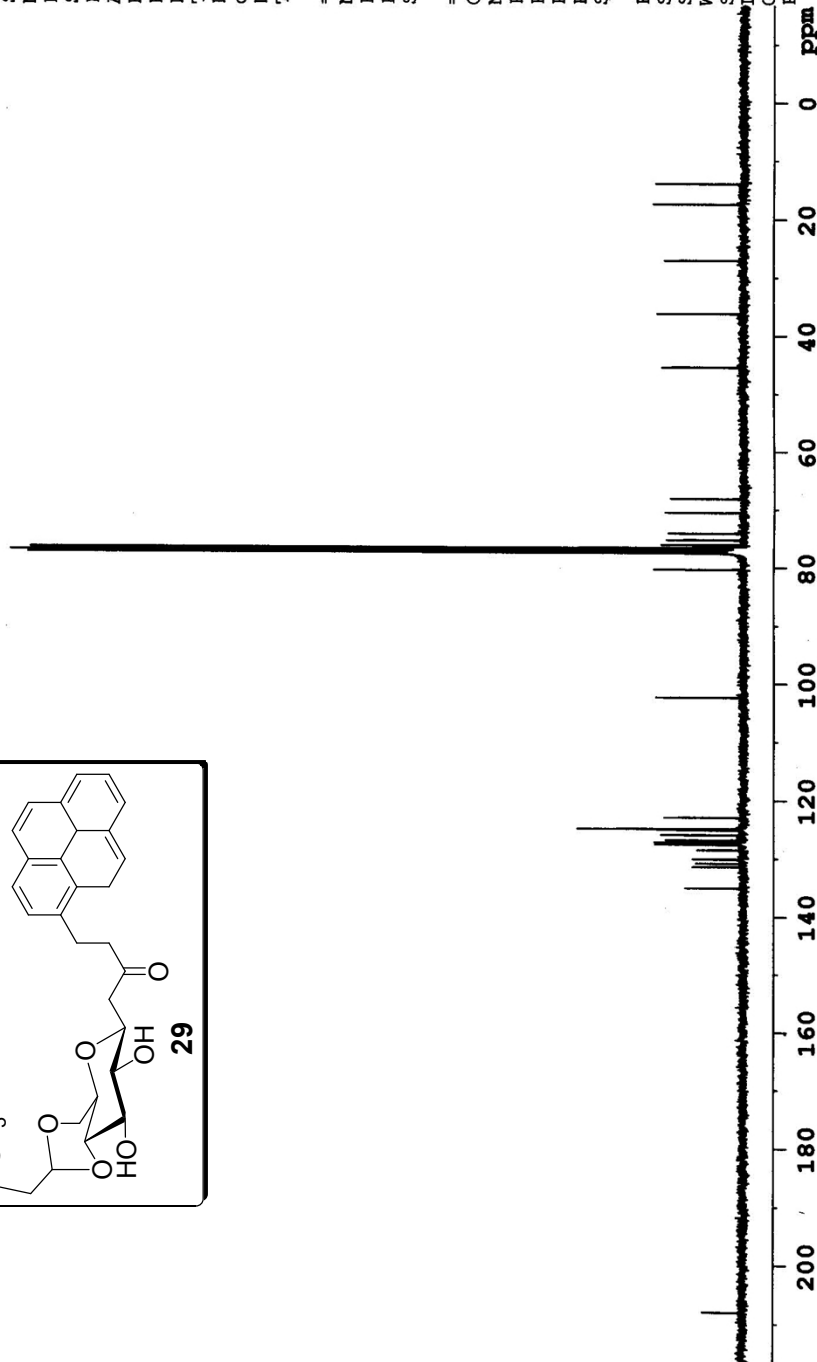

Figure 12 <sup>13</sup>C NMR spectrum (75 MHz, CDCl<sub>3</sub>) of compound, 29.

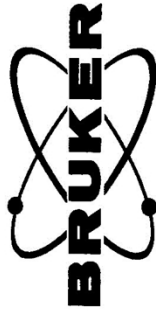

Current Data Parameters  
 NAME TMDH-TGM-2  
 EXPNO 2  
 PROCNO 1

F2 - Acquisition Parameters  
 Date\_ 20130524  
 Time 17.14  
 INSTRUM spect  
 PROBHD 5 mm DUL 13C-1  
 PULPROG depl135  
 TD 65536  
 SOLVENT CDCl3  
 NS 192  
 DS 4  
 SWH 17985.611 Hz  
 FIDRES 0.274439 Hz  
 AQ 1.8219508 sec  
 RG 16384  
 DW 27.800 usec  
 DE 6.00 usec  
 TE 300.0 K  
 CNST2 145.000000  
 D1 2.0000000 sec  
 d2 0.00344828 sec  
 d12 0.0002000 sec  
 DELTA 0.00001184 sec  
 TD0 1

==== CHANNEL f1 =====  
 NUC1 13C  
 P1 9.30 usec  
 P2 18.60 usec  
 PL1 0.00 dB  
 SF01 75.4752953 MHz

==== CHANNEL f2 =====  
 CPDPRG2 waltz16  
 NUC2 1H  
 P3 13.15 usec  
 P4 26.30 usec  
 PCPD2 80.00 usec  
 PL2 0.00 dB  
 PL12 15.68 dB  
 SF02 300.1312005 MHz

F2 - Processing parameters  
 SI 32768  
 SF 75.4677490 MHz  
 WDW EM  
 SSB 0  
 LB 1.00 Hz  
 GB 0  
 PC 1.40

127.58  
 127.47  
 127.24  
 126.82  
 125.93  
 125.06  
 124.89  
 122.94  
 102.37  
 80.29  
 76.02  
 75.20  
 74.08  
 70.52  
 68.13  
 45.47  
 45.38  
 36.18  
 27.00  
 17.43  
 13.93

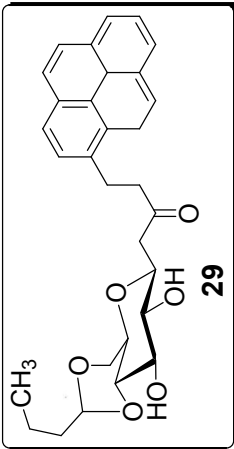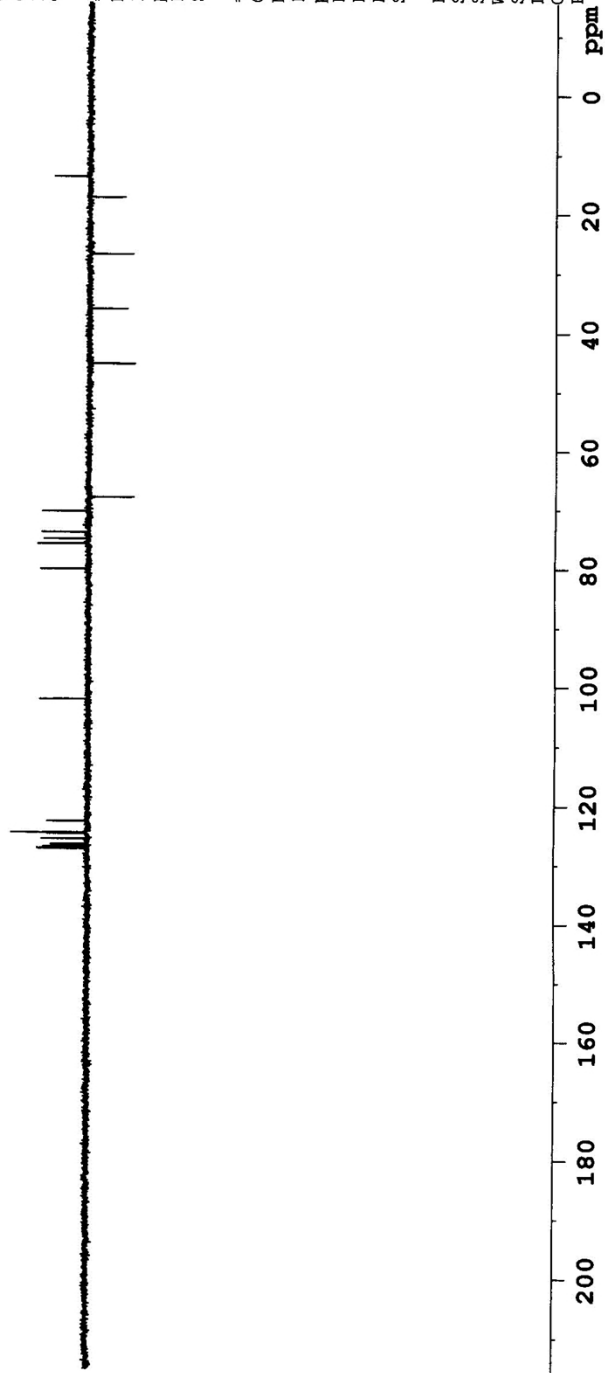

Figure 13 DEPT-135 spectrum (75 MHz, CDCl<sub>3</sub>) of compound, 29.

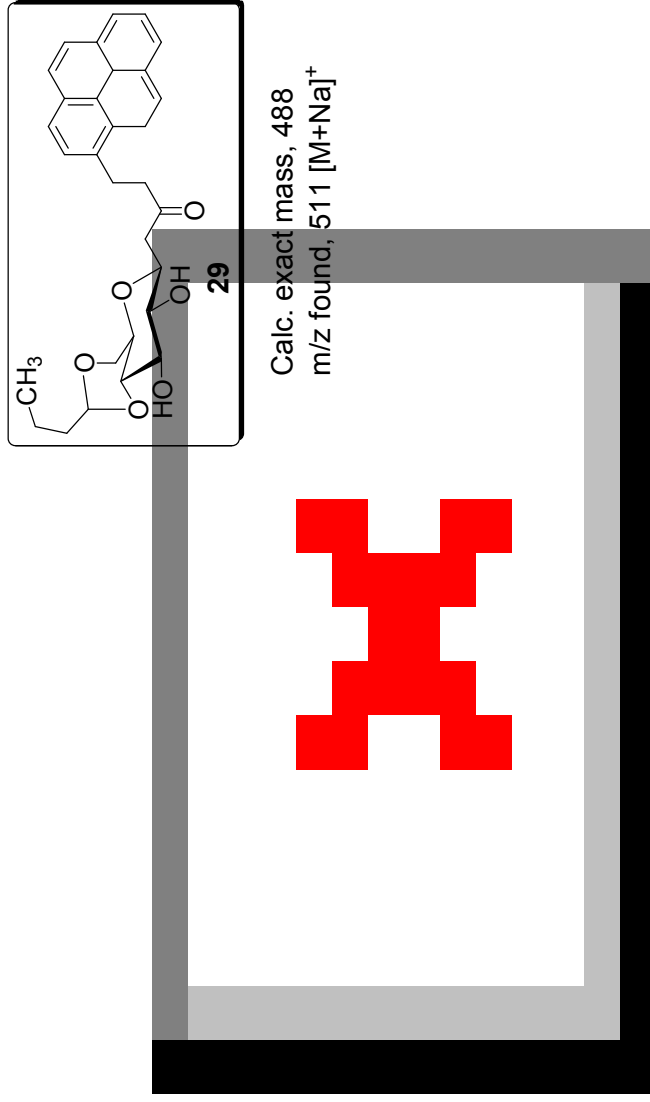

Figure 14 Mass spectrum of compound, 29.

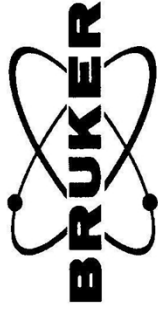

Current Data Parameters  
 NAME TMDH-290-1  
 EXPNO 1  
 PROCNO 1

F2 - Acquisition Parameters  
 Date\_ 20121229  
 Time 19.17  
 INSTRUM spect  
 PROBHD 5 mm DUL 13C-1  
 PULPROG zg30  
 TD 65536  
 SOLVENT CDCl3  
 NS 22  
 DS 2  
 SWH 6172.839 Hz  
 FIDRES 0.094190 Hz  
 AQ 5.3084660 sec  
 RG 322.5  
 DW 81.000 usec  
 DE 6.00 usec  
 TE 300.0 K  
 D1 1.00000000 sec  
 TD0 1

==== CHANNEL f1 =====  
 NUC1 1H  
 P1 13.15 usec  
 PL1 0.00 dB  
 SFO1 300.1318534 MHz

F2 - Processing parameters  
 SI 32768  
 SF 300.1300057 MHz  
 WDW EM  
 SSB 0  
 LB 0.30 Hz  
 GB 0  
 PC 1.00

8.271  
8.216  
8.164  
8.136  
7.900  
7.870  
7.829  
7.803  
7.541  
7.537  
7.444  
7.418  
7.402  
7.372  
7.112  
7.057  
4.896  
4.888  
4.563  
4.546  
4.529  
4.188  
4.169  
4.156  
3.756  
3.497  
3.464  
3.432  
3.380  
3.307  
3.277  
3.248  
3.208  
3.194  
3.078  
3.054  
2.572  
2.564  
2.556  
1.649  
1.625  
1.609  
1.467  
1.442  
1.416  
0.947  
0.922  
0.898

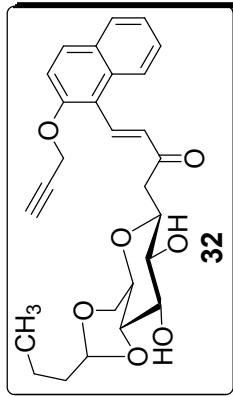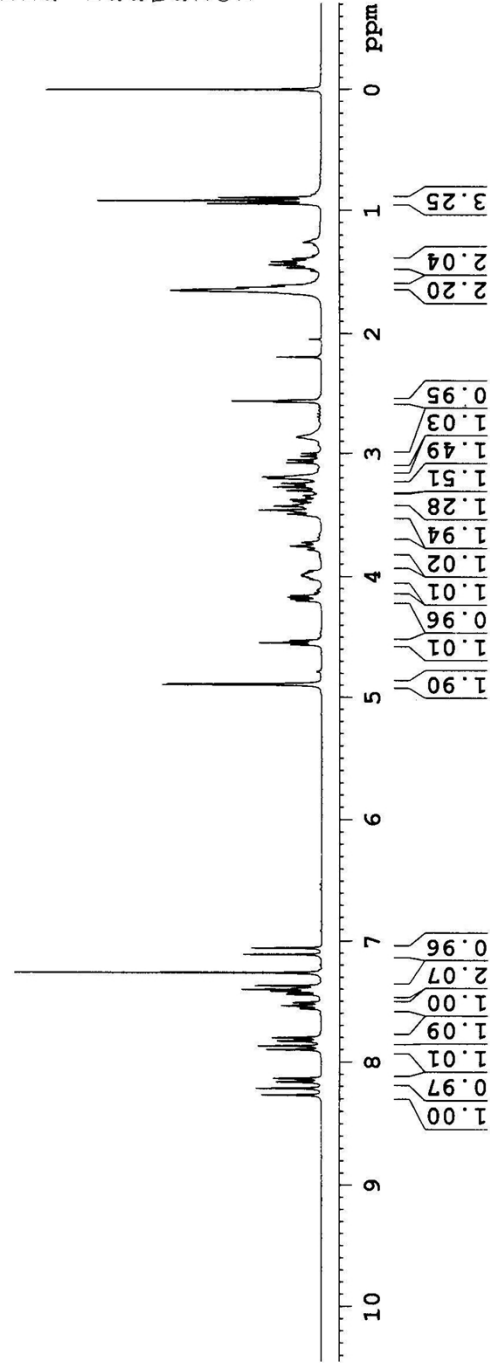

Figure 15 <sup>1</sup>H NMR spectrum (300 MHz, CDCl<sub>3</sub>) of compound, 32.



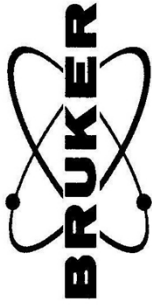

Current Data Parameters  
NAME TMDH-290-1  
EXPNO 2  
PROCNO 1

F2 - Acquisition Parameters  
Date\_ 20121229  
Time\_ 19.29  
INSTRUM spect  
PROBHD 5 mm DUL 13C-1  
PULPROG zgpg30  
TD 65536  
SOLVENT CDCl3  
NS 2000  
DS 4  
SWH 17985.611 Hz  
FIDRES 0.274439 Hz  
AQ 1.8219508 sec  
RG 4096  
DW 27.800 usec  
DE 6.00 usec  
TE 300.0 K  
D1 2.0000000 sec  
d11 0.0300000 sec  
DELTA 1.89999998 sec  
TDO 1

==== CHANNEL f1 =====  
NUC1 13C  
P1 9.30 usec  
PL1 0.00 dB  
SFO1 75.4752953 MHz

==== CHANNEL f2 =====  
CPDPRG2 waltz16  
NUC2 1H  
PCPD2 80.00 usec  
PL2 0.00 dB  
PL12 15.68 dB  
PL13 16.00 dB  
SFO2 300.1312005 MHz

F2 - Processing parameters  
SI 32768  
SF 75.4677490 MHz  
WDW EM  
SSB 0  
ALB 1.00 Hz  
GB 0  
PC 1.40

198.88  
154.69  
136.94  
132.71  
132.04  
131.73  
129.54  
128.68  
127.59  
124.48  
123.51  
118.14  
114.19  
102.48  
80.46  
78.31  
77.21  
76.27  
75.44  
74.65  
70.70  
68.38  
56.96  
43.80  
36.25  
17.47  
13.92

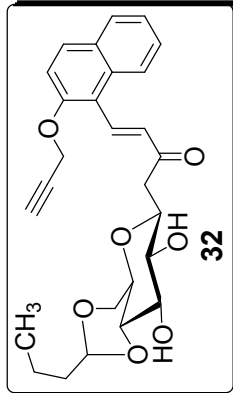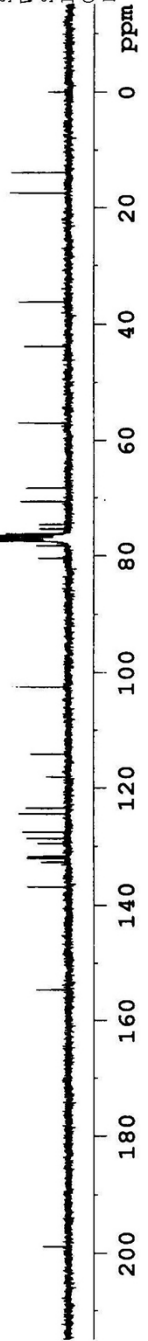

Figure 16 <sup>13</sup>C NMR spectrum (75 MHz, CDCl<sub>3</sub>) of compound, 32.

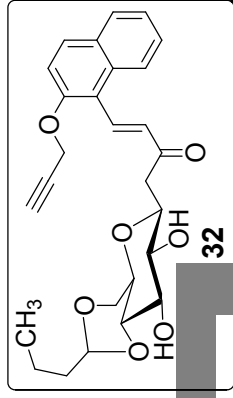

32

Calc. exact mass, 466.20  
m/z found, 467.21 [M+H]<sup>+</sup>

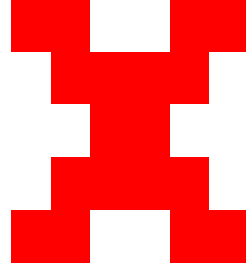

Figure 17 Mass spectrum of compound, 32.

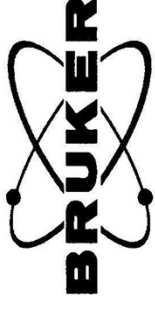

Current Data Parameters  
NAME TMDH-288  
EXNO 1  
PROCNO 1

F2 - Acquisition Parameters  
Date 20121226  
Time 15.51  
INSTRUM spect  
PROBHD 5 mm DUL 13C-1  
PULPROG zg30  
TD 65536  
SOLVENT CDCl3  
NS 50  
DS 2  
SWH 6172.839 Hz  
FIDRES 0.094190 Hz  
AQ 5.3084660 sec  
RG 724.1  
DW 81.000 usec  
DE 6.00 usec  
TE 300.0 K  
D1 1.00000000 sec  
TD0 1

==== CHANNEL f1 =====  
NUC1 1H  
P1 13.15 usec  
PL1 0.00 dB  
SF01 300.1318534 MHz

F2 - Processing parameters  
SI 32768  
SF 300.1300058 MHz  
WDW EM  
SSB 0  
LB 0.30 Hz  
GB 0  
PC 1.00

2.559  
2.552  
2.544

4.931  
4.924

8.452  
8.398  
8.305  
8.277  
7.911  
7.880  
7.848  
7.821  
7.588  
7.588  
7.565  
7.541  
7.512  
7.458  
7.439  
7.409  
7.263

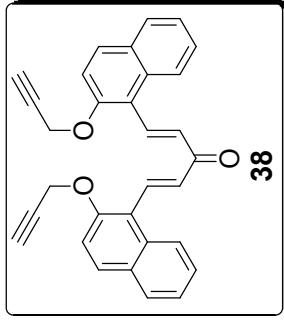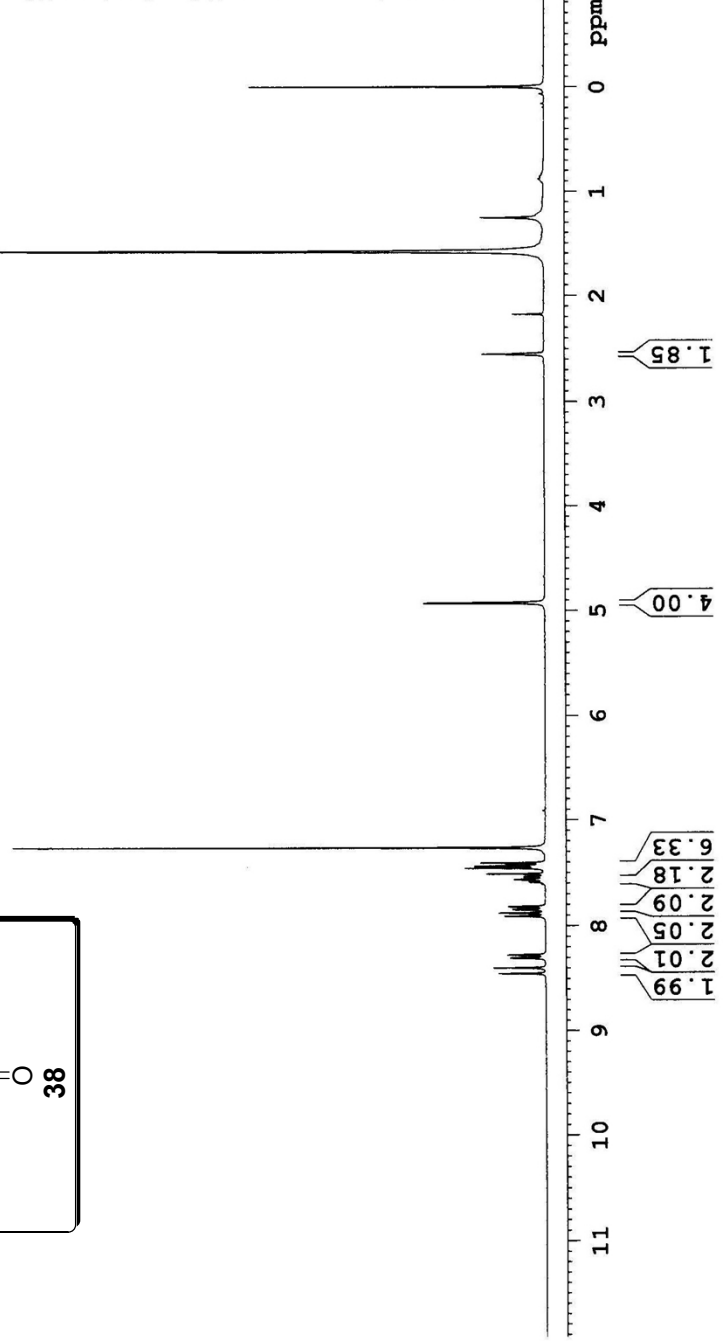

Figure 18 <sup>1</sup>H NMR spectrum (300 MHz, CDCl<sub>3</sub>) of compound, 38.

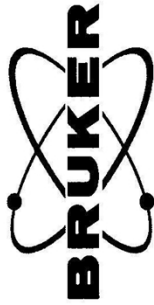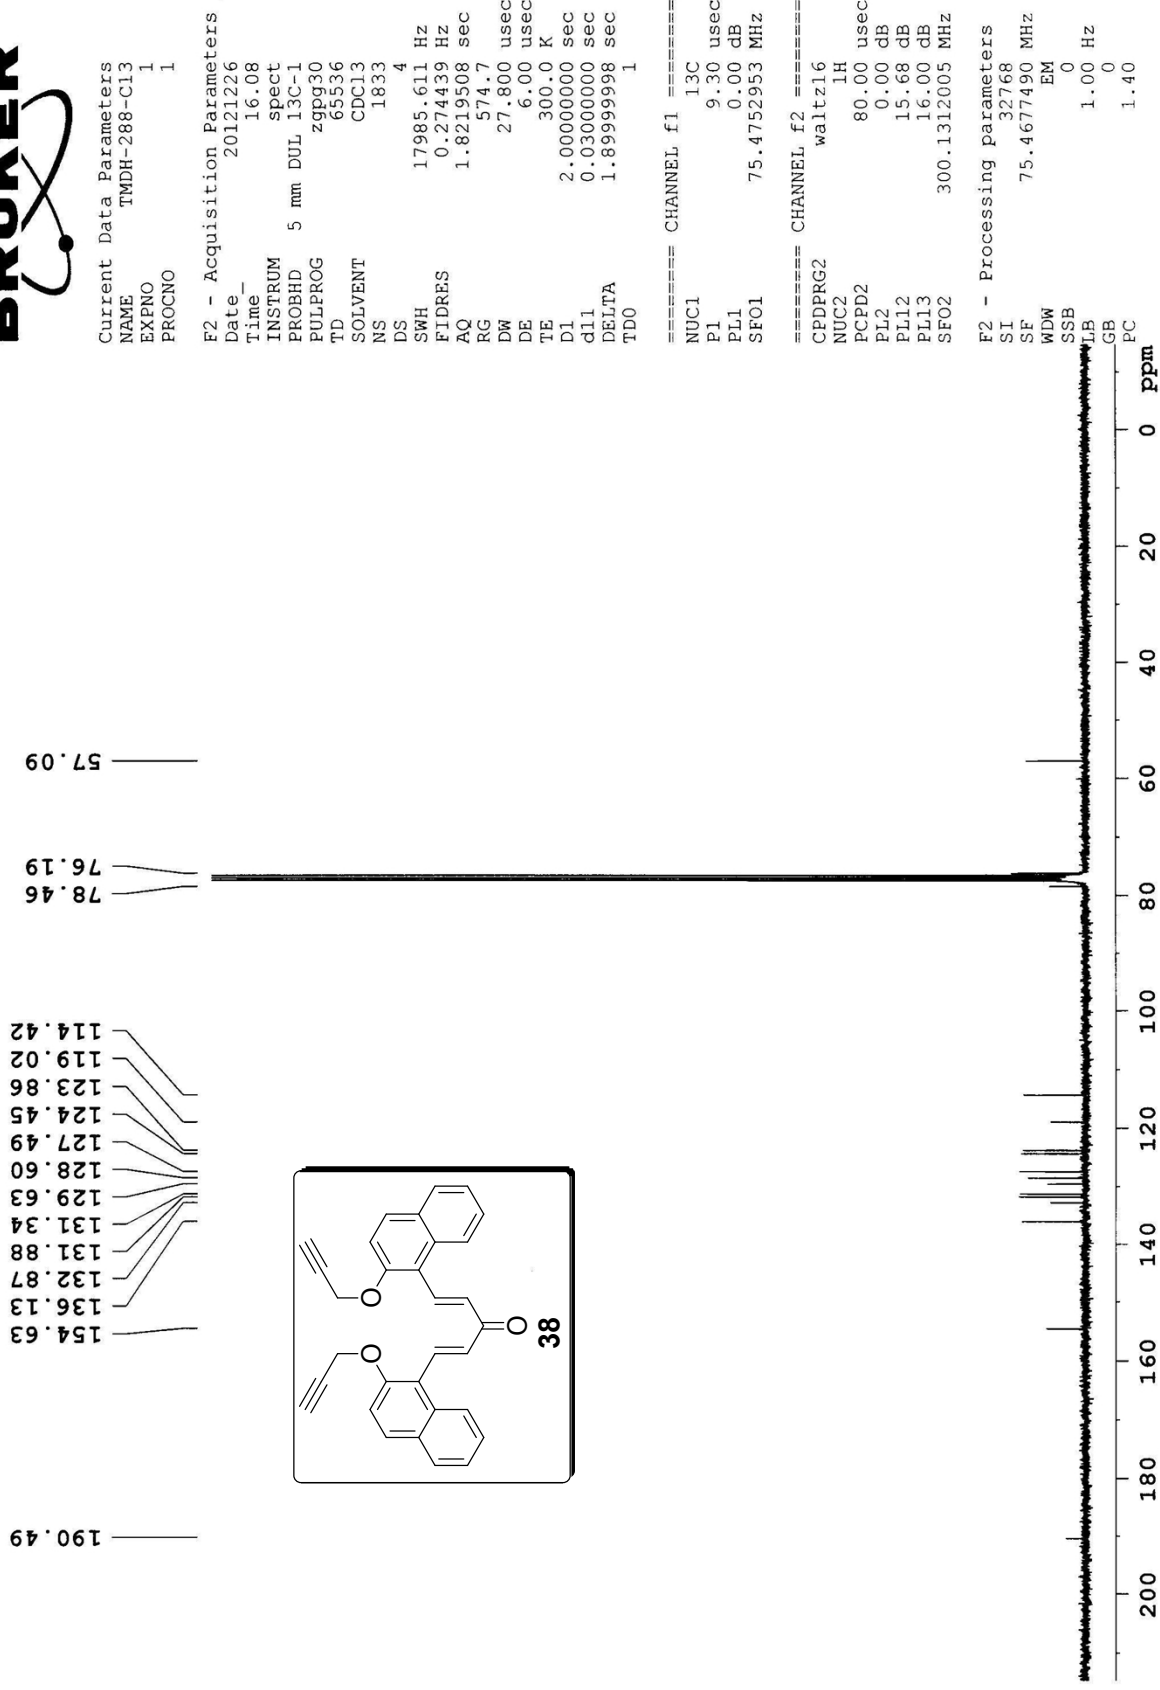

Figure 19 <sup>13</sup>C NMR spectrum (75 MHz, CDCl<sub>3</sub>) of compound, 38.

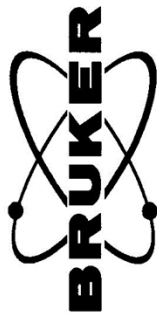

Current Data Parameters  
 NAME TMD-288  
 EXPNO 1  
 PROCNO 1

F2 - Acquisition Parameters  
 Date\_ 20121227  
 Time 10.27  
 INSTRUM spect  
 PROBHD 5 mm DUL 13C-1  
 PULPROG dept135  
 TD 65536  
 SOLVENT CDCl3  
 NS 687  
 DS 4  
 SWH 17985.611 Hz  
 FIDRES 0.274439 Hz  
 AQ 1.8219508 sec  
 RG 16384  
 DW 27.800 usec  
 DE 6.00 usec  
 TE 300.0 K  
 CNST2 145.0000000  
 D1 2.0000000 sec  
 d2 0.00344828 sec  
 d12 0.00002000 sec  
 DELTA 0.00001184 sec  
 TD0 1

===== CHANNEL f1 =====  
 NUC1 13C  
 P1 9.30 usec  
 P2 18.60 usec  
 PL1 0.00 dB  
 SFO1 75.4752953 MHz

===== CHANNEL f2 =====  
 CPDPRG2 waltz16  
 NUC2 1H  
 P3 13.15 usec  
 P4 26.30 usec  
 PCPD2 80.00 usec  
 PL2 0.00 dB  
 PL12 15.68 dB  
 SFO2 300.1312005 MHz

F2 - Processing parameters  
 SI 32768  
 SF 75.4677490 MHz  
 WDW EM  
 SSB 0  
 LB 1.00 Hz  
 GB 0  
 PC 1.40

136.14  
 131.86  
 131.36  
 128.61  
 127.50  
 124.45  
 123.86  
 114.38

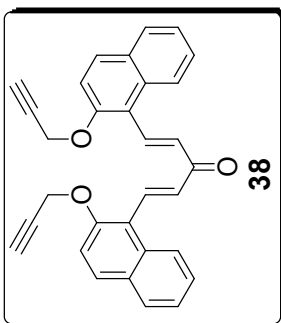

57.06

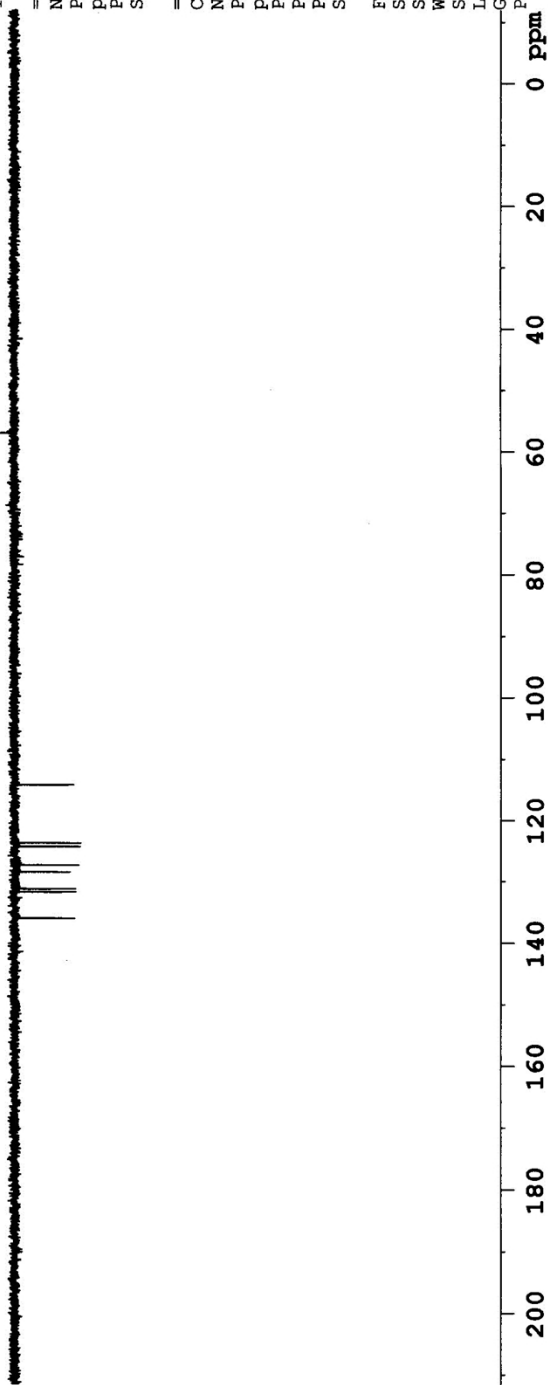

Figure 20 DEPT-135 spectrum (75 MHz, CDCl<sub>3</sub>) of compound, 38.

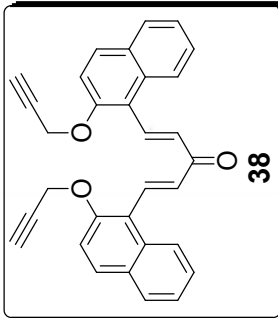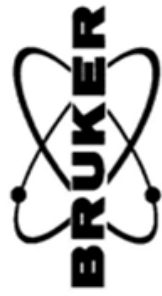

Current Data Parameters  
 NAME TMDR-288-2D  
 EXPNO 2  
 PROCNO 1

F2 - Acquisition Parameters  
 Date\_ 20130101  
 Time 6.57  
 INSTRUM spect  
 PROBHD 5 mm DUL 13C-1  
 PULPROG cosyxf90  
 TD 2048  
 SOLVENT CDCl3  
 NS 8  
 DS 4  
 SMH 2997.602 Hz  
 FIDRES 1.463673 Hz  
 AQ 0.3416564 sec  
 RG 406.4  
 DW 166.800 usec  
 DE 6.00 usec  
 TE 300.0 K  
 d0 0.00000300 sec  
 d1 1.98975897 sec  
 INO 0.00033360 sec

CHANNEL f1  
 NDC1 1H  
 P1 13.15 usec  
 PL1 0.00 dB  
 SF01 300.1313199 MHz

F1 - Acquisition parameters  
 NDO 1  
 TD 256  
 SF01 300.1313 MHz  
 FIDRES 11.709382 Hz  
 SW 9.988 Ppm  
 FhMODE QF

F2 - Processing parameters  
 SI 1024  
 SF 300.1300062 MHz  
 WDW SINE  
 SSB 0  
 LB 0.00 Hz  
 GB 0  
 PC 1.40

F1 - Processing parameters  
 SI 1024  
 MC2 QF  
 SF 300.1300062 MHz  
 WDW SINE  
 SSB 0  
 LB 0.00 Hz  
 GB 0

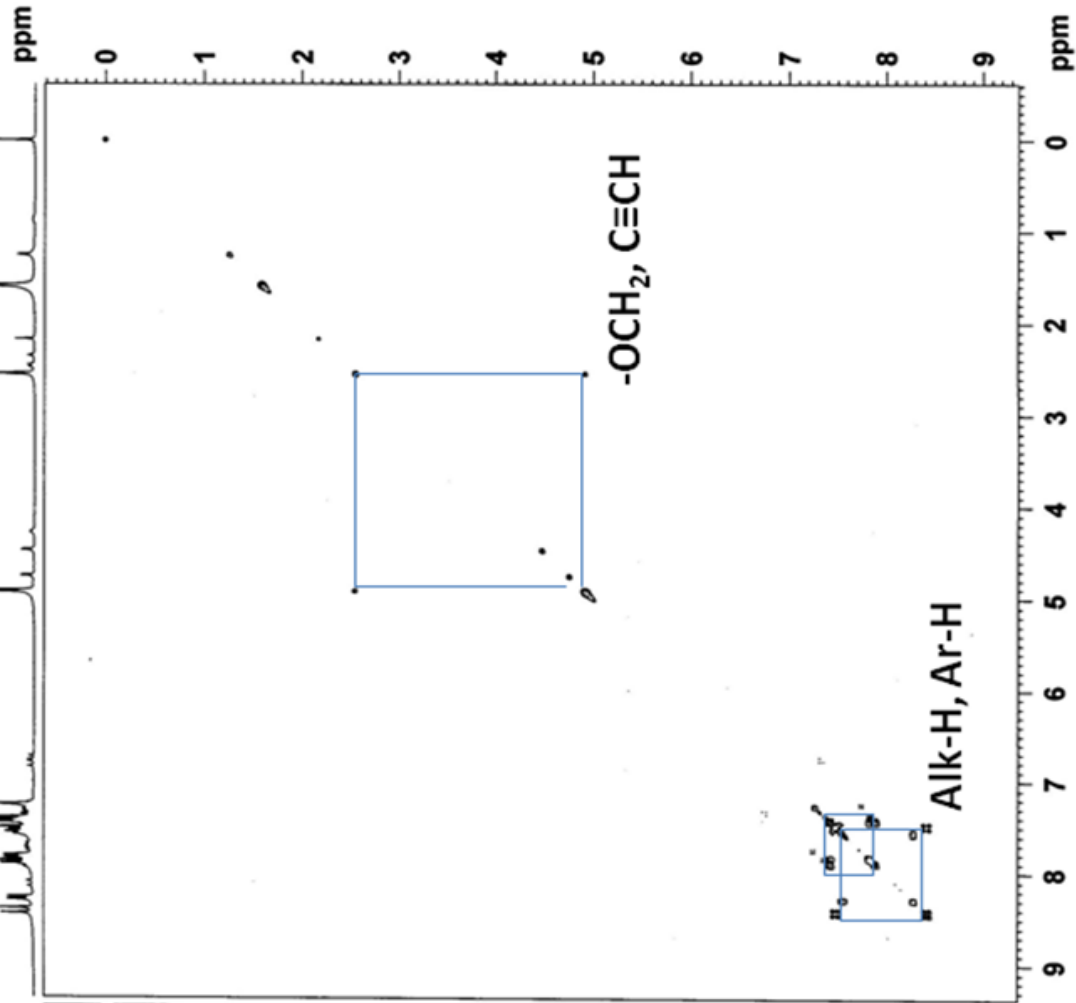

Figure 21 <sup>1</sup>H-<sup>1</sup>H [COSY] spectrum (300 MHz, CDCl<sub>3</sub>) of compound, 38.

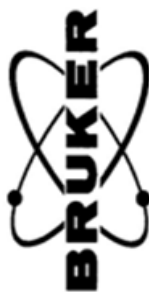

Current Data Parameters  
NAME: TMSH-288-ZD  
EXPNO: 4  
PROCNO: 1

F2 - Acquisition Parameters  
Date\_ 20130101  
Time 8.52  
INSTRUM spect  
PROBHD 5 mm DOL 13C-1  
PULPROG zgpg30  
TD 65536  
SOLVENT CDCl3  
NS 16  
DS 4  
SWH 16666.666 Hz  
FIDRES 4.069010 Hz  
AQ 0.1229300 sec  
RG 16384  
CW 30.000 usec  
CYCLES 1024  
TE 300.0 K  
CNS1 145.0000000  
CNS2 145.0000000  
CNS3 3.0000000  
d0 0.00000300 sec  
d1 2.04423189 sec  
d2 0.00344828 sec  
d3 0.00229885 sec  
d4 0.00000000 sec  
d5 0.00000000 sec  
d6 0.00000000 sec  
d7 0.00000000 sec  
d8 0.00000000 sec  
d9 0.00016080 sec

\*\*\*\*\* CHANNEL f1 \*\*\*\*\*  
NUC1 13C  
P1 9.30 usec  
PL1 18.40 dB  
SFO1 75.474263 MHz

\*\*\*\*\* CHANNEL f2 \*\*\*\*\*  
CPDPRG2 waltz16  
NUC2 1H  
P3 13.15 usec  
PL2 80.00 usec  
PL3 0.00 dB  
PL4 15.68 dB  
SFO2 300.1313555 MHz

F1 - Acquisition parameters  
NS0 2  
TD 110  
SFO1 300.1314 MHz  
FIDRES 28.267752 Hz  
SW 10.360 PPM  
FREQ00 QF

F2 - Processing parameters  
SI 2048  
SF 75.4677490 MHz  
WDW Q3162  
SSB 2  
LB 0.00 Hz  
GB 0  
PC 1.40

F1 - Processing parameters  
SI 1024  
SF 300.1300000 MHz  
WDW Q3162  
SSB 2  
LB 0.00 Hz  
GB 0

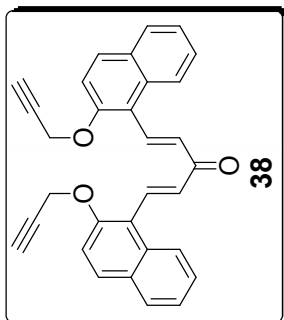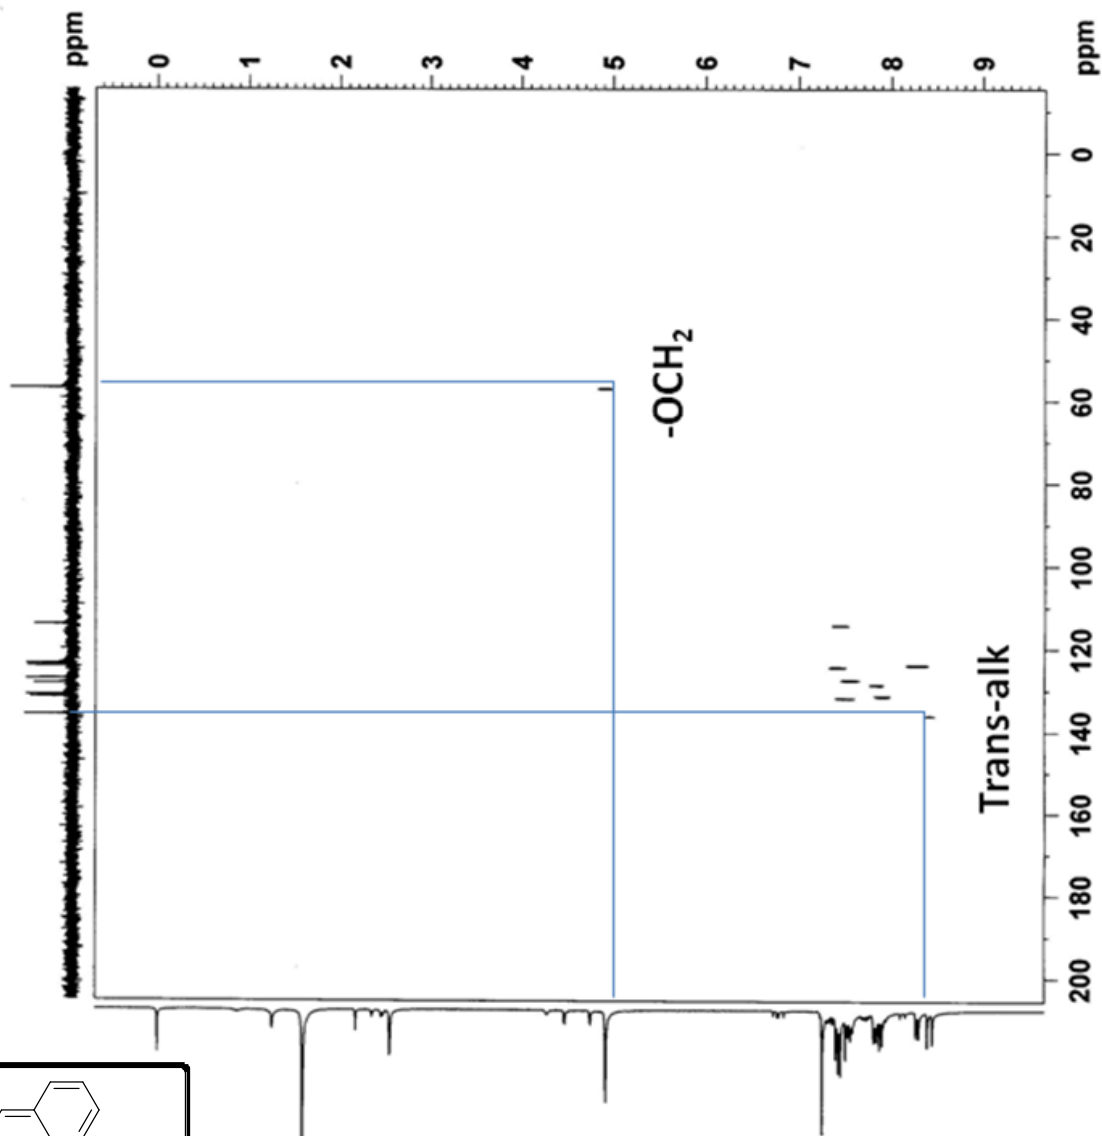

Figure 22  $^1\text{H}$ - $^{13}\text{C}$  [COSY] spectrum (300 MHz, 75 MHz,  $\text{CDCl}_3$ ) of compound, **38**.

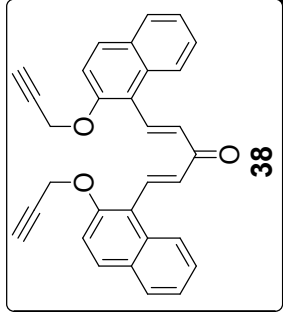

Calc. exact mass, 422.16  
m/z found, 423.16 [M+H]<sup>+</sup>

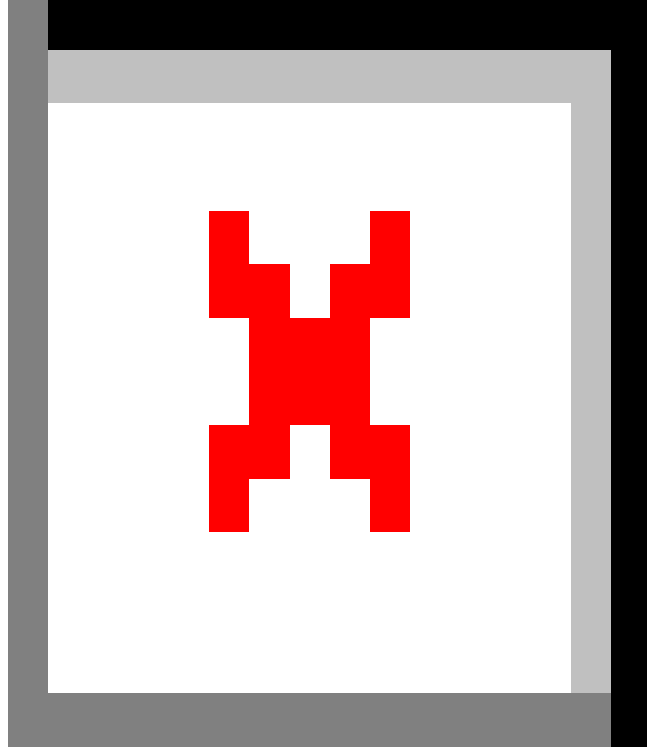

Figure 23 Mass spectrum of compound, 38.



**Table 1: Gelation studies of sugar chalcone derivatives**

| Solvents<br>/Solvent<br>mixture | Compounds                                   |   |   |    |   |    |    |    |    |    |    |    |    |    |    |    |    |    |   |   |   |   |   |   |   |   |
|---------------------------------|---------------------------------------------|---|---|----|---|----|----|----|----|----|----|----|----|----|----|----|----|----|---|---|---|---|---|---|---|---|
|                                 | 5                                           | 6 | 7 | 8  | 9 | 10 | 11 | 12 | 13 | 14 | 15 | 16 | 17 | 18 | 19 | 20 | 21 | 22 | 1 | 2 | 3 | 4 | 5 | 6 | 7 | 8 |
|                                 | (Compounds in section 2.s to 2.z<br>in ESI) |   |   |    |   |    |    |    |    |    |    |    |    |    |    |    |    |    |   |   |   |   |   |   |   |   |
| Hexane                          | I                                           | I | I | I  | I | I  | I  | I  | I  | I  | I  | I  | I  | I  | I  | I  | I  | I  | I | I | I | I | I | I | I | I |
| EtOAc                           | P                                           | P | I | PG | P | P  | P  | P  | P  | P  | I  | P  | P  | S  | S  | S  | S  | S  | S | S | S | S | S | S | S | I |
| CHCl <sub>3</sub>               | P                                           | P | I | G  | S | P  | P  | P  | P  | P  | I  | P  | P  | S  | S  | S  | S  | S  | S | S | S | S | S | S | S | I |
| CHCl <sub>2</sub>               | P                                           | P | I | S  | S | P  | P  | P  | P  | P  | I  | P  | P  | S  | S  | S  | S  | S  | S | S | S | S | S | S | S | I |
| MeOH                            | P                                           | P | I | S  | S | P  | P  | P  | P  | P  | I  | S  | S  | P  | S  | S  | S  | S  | S | S | S | S | S | S | S | S |
| EtOH                            | P                                           | P | I | S  | S | P  | P  | P  | P  | P  | I  | S  | S  | P  | S  | S  | S  | S  | S | S | S | S | S | S | S | I |
| CH <sub>3</sub> CN              | P                                           | P | S | S  | S | P  | P  | P  | S  | P  | I  | S  | S  | P  | S  | S  | S  | S  | S | S | S | P | P | P | P | I |
| DMSO                            | S                                           | S | S | S  | S | S  | S  | S  | S  | S  | S  | S  | S  | S  | S  | S  | S  | S  | S | S | S | S | S | S | S | S |
| H <sub>2</sub> O                | I                                           | I | I | I  | I | I  | I  | I  | I  | I  | I  | I  | I  | I  | I  | I  | I  | I  | I | I | I | I | I | I | I | I |
| DMSO+<br>H <sub>2</sub> O       | P                                           | P | G | P  | P | P  | P  | S  | S  | P  | P  | P  | P  | P  | P  | P  | PG | P  | P | P | G | P | P | P | I |   |
| CHCl <sub>3</sub> +<br>MeOH     | S                                           | S | S | G  | G | S  | S  | P  | P  | P  | I  | S  | S  | S  | S  | S  | S  | S  | S | S | S | S | S | S | I |   |
| Hex+eth<br>ylacetate            | S                                           | S | P | P  | P | S  | S  | P  | P  | P  | I  | S  | S  | S  | S  | S  | P  | S  | S | S | P | S | S | S | I |   |
| Hex+chl<br>oroform              | S                                           | S | P | P  | P | S  | S  | P  | P  | P  | I  | S  | S  | S  | S  | S  | P  | S  | S | S | P | S | S | S | I |   |

**Note:** G = Gel; PG = Partial gel; S = Soluble; P = Precipitation; I = Insoluble.



|                         |   |   |   |   |   |   |   |   |   |   |   |   |   |   |
|-------------------------|---|---|---|---|---|---|---|---|---|---|---|---|---|---|
| DMSO+H <sub>2</sub> O   | S | S | P | P | P | P | P | P | P | P | P | P | P | P |
| CHCl <sub>3</sub> +MeOH | S | S | S | S | S | S | S | S | S | S | S | S | S | S |
| Hex+EtOAc               | S | S | S | S | S | S | S | S | P | S | S | S | S | S |
| Hex+CHCl <sub>3</sub>   | S | S | S | S | S | S | S | S | P | S | S | S | S | S |

---

**Note:** G = Gel; PG = Partial gel; S = Soluble; P = Precipitation; I = Insoluble.
